# Supplementary material for: Independent Evolution of Sex Chromosomes in Eublepharid Geckos, a Lineage with Environmental and Genotypic Sex Determination
Source: Preprints.org preprint supplement (doi:10.20944/preprints202011.0213.v1), 2020-11-05
Supplement: Supplementary file 1 [file supplementary]

## Sheet: Table S1
Table S1 List of geckos, per species and sex, used in the current study.
Species	Family	Sex
		♂	♀
Aeluroscalabotes felinus	Eublepharidae	1	1
Coleonyx brevis		1	1
Coleonyx elegans		1	1
Coleonyx mitratus		1	1
Coleonyx variegatus		1	1
Eublepharis hardwickii		1	1
Eublepharis macularius		1	1
Goniurosaurus luii		1	1
Goniurosaurus splendens		1	1
Goniurosaurus hainanensis		1	1
Hemitheconyx caudicinctus		1	1
Holodactylus africanus		1	1
Ptyodactylus togoensis	Phyllodactylidae	1	1
Tarentola mauritanica		1	1
Sphaerodactylus elegans	Sphaerodactylidae	1	1

## Sheet: Table S2
Table S2: Read coverage analysis in Coleonyx elegans: the average coverage per gene in male and female, as well as the normalized male to female coverage ratio are presented. In addition, the homology of examined genes to the genes of Anolis carolinensis, Podarcis muralis and Gallus gallus is presented.
	Anolis carolinensis			Podarcis muralis				Gallus gallus
Gene code	chr	start	end	scaffold	chr	start	end	scaffold	chr	start	end	male coverage	female coverage	m/f ratio	log2 m/f ratio
rnf212b	NW_003339323.1	14508	42154	NC_041324.1	13	49344219	49355290	NC_006088.5	1	90542	104290	32.5	34.34	0.92	-0.11
nme6	NW_003339312.1	45719	56510	NC_041321.1	10	73800949	73814772	NC_006088.5	1	384262	387642	30.49	22.86	1.3	0.38
acr								NC_006088.5	1	392565	395064	48.81	52.67	0.91	-0.14
arsa	NW_003341253.1	282	16483	NC_041321.1	10	73021907	73039047	NC_006088.5	1	395826	401444	24.01	24.41	0.96	-0.06
shank3	NW_003339384.1	73057	166147					NC_006088.5	1	429321	703272	31.65	30.88	1	0
opn1sw	NW_003339375.1	107040	120255	NC_041321.1	10	70969605	70977089	NC_006088.5	1	752193	752615	31.48	30.32	1.01	0.02
flnc	NW_003339831.1	13445	57708	NC_041321.1	10	71056899	71175546	NC_006088.5	1	754160	764124	34.9	32.16	1.06	0.08
dpf2	NW_003340646.1	502	7429	NC_041327.1	16	15470987	15497949	NC_006088.5	1	938571	939817	32.69	30.85	1.04	0.05
pax4				NC_041321.1	10	74379791	74388938	NC_006088.5	1	1082829	1083927	28.87	28.89	0.98	-0.03
gcc1	NW_003339616.1	18936	26984	NC_041321.1	10	74346182	74352273	NC_006088.5	1	1103223	1108108	23.9	28.15	0.83	-0.27
dennd6b	NW_003339616.1	8488	17516	NC_041321.1	10	75251213	75272240	NC_006088.5	1	1109042	1128307	28.42	30.24	0.92	-0.12
sbf1	NW_003339402.1	138443	160045	NC_041321.1	10	75162506	75204113	NC_006088.5	1	1215112	1274500	29.28	28.19	1.01	0.02
miox	NW_003339957.1	90	11813	NC_041321.1	10	74047943	74066666	NC_006088.5	1	1280983	1284304	30.54	28.53	1.05	0.06
lmf2	NW_003339957.1	15836	37879	NC_041321.1	10	74067856	74097600	NC_006088.5	1	1284433	1291151	30.99	28.59	1.06	0.08
ncaph2	NW_003340371.1	942	20447	NC_041321.1	10	74097744	74131029	NC_006088.5	1	1291066	1300798	29.9	27.7	1.05	0.08
irf5				NC_041321.1	10	70849995	70895988	NC_006088.5	1	1303539	1314015	25.53	33.54	0.74	-0.43
tnpo3	NW_003339541.1	18916	78653	NC_041321.1	10	70799956	70843845	NC_006088.5	1	1314153	1333164	30.8	30.57	0.98	-0.02
smo	NW_003339200.1	21894	52862	NC_041321.1	10	70707281	70741177	NC_006088.5	1	1339489	1348014	30.18	29.06	1.01	0.02
ahcyl2	NW_003339200.1	159608	193896	NC_041321.1	10	70599406	70698107	NC_006088.5	1	1348918	1393269	31.47	31.53	0.97	-0.04
strip2	NW_003339200.1	213882	253408	NC_041321.1	10	70527604	70593052	NC_006088.5	1	1393854	1409355	33.93	34.75	0.95	-0.07
nrf1	NW_003339200.1	297396	354914					NC_006088.5	1	1428121	1476140	30.24	28.24	1.05	0.06
ube2h	NW_003339255.1	9933	48309	NC_041321.1	10	70223186	70290611	NC_006088.5	1	1491818	1533752	48.91	39.53	1.21	0.27
zc3hc1	NW_003339255.1	158443	194998	NC_041321.1	10	70172848	70193205	NC_006088.5	1	1535010	1543994	31.17	28.43	1.07	0.1
klhdc10	NW_003339255.1	195302	222251	NC_041321.1	10	70145835	70168867	NC_006088.5	1	1544347	1559738	31.86	30.5	1.02	0.03
tmem209	NW_003339366.1	135664	169131	NC_041321.1	10	70064155	70082951	NC_006088.5	1	1569534	1580871	32.24	31.93	0.99	-0.02
cep41	NW_003339366.1	22812	46226	NC_041321.1	10	69986504	70010158	NC_006088.5	1	1606086	1614429	32.78	31.9	1	0.01
mest	NW_003339366.1	4673	18681	NC_041321.1	10	69966476	69984735	NC_006088.5	1	1614538	1619688	28.38	30.65	0.9	-0.14
copg2				NC_041321.1	10	69923827	69961241	NC_006088.5	1	1619584	1638596	31.96	33.24	0.94	-0.09
fbxo18	5	3833924	3866697					NC_006088.5	1	1655499	1679712	34.16	29.32	1.14	0.19
ankrd16	5	3869479	3894186	NC_041321.1	10	69519257	69545757	NC_006088.5	1	1679824	1696355	40.62	32.08	1.24	0.31
gdi2	5	3898239	3935584	NC_041321.1	10	69554543	69583234	NC_006088.5	1	1697438	1712227	35.97	33.5	1.05	0.07
fam208b	5	3946906	3976591					NC_006088.5	1	1698333	1745983	30.98	28.57	1.06	0.08
asb13				NC_041321.1	10	69653811	69669237	NC_006088.5	1	1751591	1763241	31.66	25.63	1.21	0.27
net1	NW_003339275.1	89153	176253	NC_041321.1	10	69822113	69890349	NC_006088.5	1	1772738	1824677	30.35	30.56	0.97	-0.04
ucn3	5	3754575	3755397	NC_041321.1	10	69388275	69398298	NC_006088.5	1	1845681	1852908	35.85	31.04	1.13	0.17
slc35b4	5	3464917	3482106	NC_041321.1	10	69089059	69111653	NC_006088.5	1	1976831	1991466	25.54	26.88	0.93	-0.11
lrguk	5	3361365	3460097	NC_041321.1	10	69025802	69082290	NC_006088.5	1	1997916	2048119	29.47	31.31	0.92	-0.12
exoc4	5	2904260	3351021	NC_041321.1	10	68643028	69012149	NC_006088.5	1	2056289	2511948	32.37	27.26	1.16	0.21
chchd3	5	2600617	2828860	NC_041321.1	10	68394639	68603575	NC_006088.5	1	2596187	2783097	34.7	31.95	1.06	0.09
podxl	5	1322474	1328723	NC_041321.1	10	67250141	67324126	NC_006088.5	1	3688000	3728758	29.66	26.58	1.09	0.12
mkln1	5	1208750	1316408	NC_041321.1	10	67139267	67239253	NC_006088.5	1	3729871	3836082	35.61	28.85	1.21	0.27
rbm17	5	652919	665834	NC_041321.1	10	66715502	66741272	NC_006088.5	1	4088040	4125993	27.68	29.86	0.91	-0.14
pfkfb3	5	565813	648575	NC_041321.1	10	66634607	66710261	NC_006088.5	1	4125378	4178122	27.71	35.92	0.75	-0.41
sfmbt2	5	363826	440103	NC_041321.1	10	66337038	66400129	NC_006088.5	1	4516708	4633498	33.19	33.77	0.96	-0.06
itih5	5	243307	288607	NC_041321.1	10	66208590	66262389	NC_006088.5	1	4720808	4767090	31.73	28.81	1.08	0.11
itih2	5	203861	234407	NC_041321.1	10	66159734	66201311	NC_006088.5	1	4774156	4799272	30.08	31.02	0.95	-0.08
atp5c1	5	184192	192188					NC_006088.5	1	4815817	4822605	33.92	30.92	1.07	0.1
taf3	5	36768	176129	NC_041321.1	10	65941307	66122387	NC_006088.5	1	4825154	4938986	29.67	27.26	1.06	0.09
gata3	NW_003339692.1	3941	49052	NC_041321.1	10	65821513	65883793	NC_006088.5	1	4960731	4988464	29.79	32.82	0.89	-0.17
celf2	5	5156396	5757218	NC_041321.1	10	64197200	64570182	NC_006088.5	1	6314414	6510224	33.17	33.21	0.98	-0.04
usp6nl	5	5814655	5984794	NC_041321.1	10	64009277	64143002	NC_006088.5	1	6569103	6679516	31.1	31.77	0.96	-0.06
echdc3	5	5988492	5997665	NC_041321.1	10	63981058	63988965	NC_006088.5	1	6699316	6704061	29.38	33.13	0.87	-0.21
proser2	5	6024069	6078629	NC_041321.1	10	63930659	63955923	NC_006088.5	1	6721752	6746565	33.33	27.53	1.18	0.24
upf2	NW_003338896.1	620661	670150	NC_041321.1	10	979281	1040248	NC_006088.5	1	6752363	6807897	32.83	33.04	0.97	-0.04
dhtkd1	NW_003338896.1	581789	612323	NC_041321.1	10	1042921	1067445	NC_006088.5	1	6811010	6828049	31.96	30.96	1.01	0.01
nudt5	NW_003338896.1	555302	576947	NC_041321.1	10	1090759	1117012	NC_006088.5	1	6850849	6862491	31.89	32.26	0.97	-0.05
cdc123	NW_003338896.1	523520	555053	NC_041321.1	10	1120598	1160877	NC_006088.5	1	6862512	6900078	31.23	31.08	0.98	-0.03
camk1d	NW_003338896.1	199861	446868	NC_041321.1	10	1192636	1439898	NC_006088.5	1	6924139	7144552	27.68	31.01	0.87	-0.2
ccdc3	NW_003338896.1	81982	161506	NC_041321.1	10	1489713	1564179	NC_006088.5	1	7159393	7201403	47.11	36.23	1.27	0.35
optn	5	89883176	89908607	NC_041321.1	10	1665499	1684024	NC_006088.5	1	7227292	7245393	34.92	29.58	1.15	0.21
mcm10	5	89912053	89944819	NC_041321.1	10	1684548	1710095	NC_006088.5	1	7248717	7265010	31.04	32.15	0.94	-0.08
phyh	5	90004212	90029591					NC_006088.5	1	7268261	7279991	30.63	29.1	1.03	0.04
sephs1	5	90036473	90056213	NC_041321.1	10	1785956	1818050	NC_006088.5	1	7287501	7311282	31.45	30.59	1	0.01
bend7	5	90073822	90138338	NC_041321.1	10	1836757	1900774	NC_006088.5	1	7324436	7372660	34.85	35.19	0.97	-0.05
prpf18	5	90152461	90171915	NC_041321.1	10	1912491	1929389	NC_006088.5	1	7384162	7401358	35.13	29.57	1.16	0.21
frmd4a	5	90185367	90658244	NC_041321.1	10	1937445	2417371	NC_006088.5	1	7403200	7760094	30.32	30.55	0.97	-0.04
fam107b	NW_003339106.1	40491	199284					NC_006088.5	1	7825013	7949297	36.11	24.91	1.42	0.5
hspa14	NW_003339106.1	231428	246872	NC_041321.1	10	2538351	2552238	NC_006088.5	1	7970741	7981599	30.44	32.22	0.92	-0.12
dclre1c	NW_003339106.1	270713	293209	NC_041321.1	10	2553256	2568423	NC_006088.5	1	7993092	8003663	33.92	27.9	1.19	0.25
meig1	NW_003339106.1	293195	304656	NC_041321.1	10	2567705	2577688	NC_006088.5	1	8003764	8019427	33.82	30.3	1.09	0.12
tmem243	NW_003339106.1	328651	367024	NC_041321.1	10	2587378	2608099	NC_006088.5	1	8021261	8028174	32.23	36.48	0.86	-0.21
dmtf1	NW_003339106.1	366728	407291	NC_041321.1	10	2607798	2638477	NC_006088.5	1	8028172	8056726	31.62	31.52	0.98	-0.03
kiaa1324l	5	89742035	89863517	NC_041321.1	10	2666920	2763208	NC_006088.5	1	8090516	8183607	31.72	31.58	0.98	-0.03
grm3	5	89447029	89735249	NC_041321.1	10	2765086	2867481	NC_006088.5	1	8188208	8296971	29.08	34.59	0.82	-0.28
sema3d	5	88670187	89235030	NC_041316.1	5	6070307	6240140	NC_006088.5	1	8841266	8983941	30.43	30.06	0.99	-0.02
sema3a	5	87898258	88133421	NC_041316.1	5	5301398	5491330	NC_006088.5	1	9228504	9514365	32.48	31.86	1	-0.01
sema3e	5	87502784	87817730	NC_041316.1	5	4961346	5125305	NC_006088.5	1	9659759	9790408	32.44	28.68	1.1	0.14
pclo	5	87049729	87377353	NC_041316.1	5	4659530	4882579	NC_006088.5	1	9888098	10217660	30.14	30.04	0.98	-0.03
cacna2d1	5	91802487	92340153	NC_041321.1	10	3539870	3993789	NC_006088.5	1	10375977	10734887	30.35	32.44	0.91	-0.13
hgf	5	92481294	92546255	NC_041321.1	10	4048860	4104373	NC_006088.5	1	10800574	10863536	31.1	30.45	1	0
cd36	5	93086141	93209208	NC_041321.1	10	4555268	4615616	NC_006088.5	1	11331789	11391266	31.42	30.16	1.02	0.03
gnat3				NC_041321.1	10	4667419	4683558	NC_006088.5	1	11413084	11443325	34.07	35.17	0.95	-0.08
gnai1				NC_041321.1	10	4736056	4759251	NC_006088.5	1	11519970	11555155	36.8	32.93	1.09	0.13
magi2	5	93761407	94694350	NC_041321.1	10	5064774	5676474	NC_006088.5	1	11833613	12559079	31.03	31.18	0.97	-0.04
phtf2	5	94735598	94814233	NC_041321.1	10	5688991	5754410	NC_006088.5	1	12579701	12642458	32.32	28.66	1.1	0.14
tmem60	5	94831627	94842632	NC_041321.1	10	5754721	5759445	NC_006088.5	1	12642799	12647025	38.03	36.55	1.02	0.02
rsbn1l	5	94848045	94880839	NC_041321.1	10	5761587	5802721	NC_006088.5	1	12649967	12698303	29.38	28.24	1.02	0.02
ptpn12	5	94888258	94967840	NC_041321.1	10	5817425	5843700	NC_006088.5	1	12710101	12785173	33.64	33.62	0.98	-0.03
gsap	5	95018798	95087196	NC_041321.1	10	5908318	5961404	NC_006088.5	1	12815007	12862688	32.92	33.82	0.95	-0.07
ccdc146	5	95088846	95161736	NC_041321.1	10	5963567	6031904	NC_006088.5	1	12862618	12935416	34.25	35.91	0.93	-0.1
fgl2	5	95122412	95131573	NC_041321.1	10	5999432	6006219	NC_006088.5	1	12915303	12921313	32.77	31.45	1.02	0.03
fam185a	5	95161841	95204854	NC_041321.1	10	6031902	6071852	NC_006088.5	1	12935324	12974762	33.52	36.49	0.9	-0.16
fbxl13	5	95205390	95293984	NC_041321.1	10	6072648	6148802	NC_006088.5	1	12976263	13055113	33.32	30.29	1.07	0.1
lrrc17	5	95253940	95272272	NC_041321.1	10	6103483	6122529	NC_006088.5	1	13006977	13025640	29	35.42	0.8	-0.32
armc10	5	95282604	95316852	NC_041321.1	10	6164375	6177052	NC_006088.5	1	13055396	13063035	31.23	33.08	0.92	-0.12
napepld	5	95314111	95353329	NC_041321.1	10	6177812	6198847	NC_006088.5	1	13065343	13085319	30.71	32.47	0.92	-0.11
pmpcb	5	95364470	95380833	NC_041321.1	10	6210298	6221485	NC_006088.5	1	13106460	13115402	30.74	32.47	0.92	-0.11
dnajc2	5	95380823	95399542	NC_041321.1	10	6221481	6236493	NC_006088.5	1	13115336	13135310	32.26	32.04	0.98	-0.02
psmc2	5	95407567	95419913	NC_041321.1	10	6237337	6247119	NC_006088.5	1	13132822	13139845	35.39	30.61	1.13	0.18
slc26a5	5	95424765	95468878	NC_041321.1	10	6247658	6281173	NC_006088.5	1	13143551	13176906	30.72	29.56	1.02	0.02
reln	5	95485191	95877524	NC_041321.1	10	6284936	6608823	NC_006088.5	1	13184634	13457315	33.72	30.72	1.07	0.1
orc5	5	95895558	95992912	NC_041321.1	10	6635474	6707800	NC_006088.5	1	13485999	13554943	32.01	34.5	0.91	-0.14
kmt2e	5	96405221	96482630	NC_041321.1	10	7106253	7165422	NC_006088.5	1	13903030	13955806	31.49	33.34	0.92	-0.12
srpk2	5	96485838	96615526	NC_041321.1	10	7171581	7261167	NC_006088.5	1	13957491	14095954	34.78	33.5	1.01	0.02
pus7	5	96645788	96673113	NC_041321.1	10	7277833	7308027	NC_006088.5	1	14116120	14138108	33.78	30.87	1.07	0.1
rint1	5	96677169	96702457	NC_041321.1	10	7316195	7334779	NC_006088.5	1	14138455	14150312	32.29	32.18	0.98	-0.03
atxn7l1	5	96712099	96800446	NC_041321.1	10	7334991	7411380	NC_006088.5	1	14156906	14267126	28.54	28.94	0.96	-0.05
cdhr3	5	96824109	96869689	NC_041321.1	10	7412774	7460226	NC_006088.5	1	14267067	14367681	35.39	30.48	1.13	0.18
sypl1	5	96878758	96886977	NC_041321.1	10	7460863	7469712	NC_006088.5	1	14331316	14337535	29.21	31.77	0.9	-0.15
nampt	5	96942222	96975564	NC_041321.1	10	7489661	7520147	NC_006088.5	1	14363077	14392439	35.76	33.18	1.05	0.07
ccdc71l	5	97068476	97069973	NC_041321.1	10	7586307	7588321	NC_006088.5	1	14503365	14511573	17.06	17.17	0.97	-0.04
pik3cg	5	97105695	97147774	NC_041321.1	10	7616498	7646887	NC_006088.5	1	14534126	14571191	31.11	33.44	0.91	-0.14
prkar2b	5	97160549	97256286	NC_041321.1	10	7649349	7711371	NC_006088.5	1	14593210	14681921	30.57	32.62	0.92	-0.13
hbp1	5	97261741	97288474	NC_041321.1	10	7713691	7736105	NC_006088.5	1	14682645	14697937	25.18	31.23	0.79	-0.34
cog5	5	97288606	97516448	NC_041321.1	10	7736485	7903837	NC_006088.5	1	14697142	14881099	33.03	34.77	0.93	-0.11
gpr22	5	97461810	97469579	NC_041321.1	10	7864477	7870079	NC_006088.5	1	14842612	14848613	33.14	35.08	0.92	-0.12
dus4l	5	97612268	97626774	NC_041321.1	10	7969731	7985553	NC_006088.5	1	14881064	14892691	28.98	32.69	0.87	-0.21
bcap29	5	97573563	97601533	NC_041321.1	10	7946005	7968281	NC_006088.5	1	14895752	14919196	35.06	32.58	1.05	0.07
slc26a4	5	97522323	97558575	NC_041321.1	10	7913134	7940807	NC_006088.5	1	14925045	14947031	33.94	32.18	1.03	0.04
cbll1	5	97627564	97645723	NC_041321.1	10	7984602	7999440	NC_006088.5	1	14949349	14955889	30.54	34.32	0.87	-0.2
slc26a3	5	97655541	97684502	NC_041321.1	10	8005834	8040917	NC_006088.5	1	14957159	14974129	33.76	32.66	1.01	0.01
dld	5	97771553	97795289	NC_041321.1	10	8075449	8093135	NC_006088.5	1	14993975	15007778	32.03	32.31	0.97	-0.05
lamb1	5	97795238	97897126	NC_041321.1	10	8093591	8155174	NC_006088.5	1	15009166	15050971	33.03	32.39	1	-0.01
ergic2	5	98003014	98041028	NC_041321.1	10	8272431	8307095	NC_006088.5	1	15105451	15128477	33.9	33.85	0.98	-0.03
lrrk2	5	98165858	98290790	NC_041321.1	10	8338789	8417137	NC_006088.5	1	15133563	15199297	32.43	32.83	0.96	-0.05
kif21a	5	98694675	98828334	NC_041321.1	10	8729942	8828462	NC_006088.5	1	15477720	15562176	30.57	34.11	0.88	-0.19
cpne8	5	99025271	99104222	NC_041321.1	10	8966001	9028390	NC_006088.5	1	15633800	15729900	33.72	33.82	0.97	-0.04
tprkb	5	99339390	99346803	NC_041321.1	10	9145466	9163311	NC_006088.5	1	15825338	15829359	43.62	35.8	1.19	0.25
gtse1	5	99383927	99394599	NC_041321.1	10	9173522	9187427	NC_006088.5	1	15836990	15848000	32.97	32.34	1	-0.01
trmu	5	99396539	99414547	NC_041321.1	10	9190708	9206054	NC_006088.5	1	15848577	15860201	33.55	29.12	1.13	0.17
celsr1	5	99427183	99632789	NC_041321.1	10	9218156	9369556	NC_006088.5	1	15865481	16041559	34.63	32.46	1.04	0.06
gramd4	5	72815507	72932329	NC_041321.1	10	9417061	9519967	NC_006088.5	1	16063693	16139376	33.63	31.61	1.04	0.06
cerk	5	72547851	72595842	NC_041321.1	10	9676232	9718266	NC_006088.5	1	16257552	16300910	32.03	32.43	0.96	-0.05
tbc1d22a	5	72350031	72506797	NC_041321.1	10	9768640	9863247	NC_006088.5	1	16325240	16480220	32.91	30.16	1.07	0.09
brd1	NW_003338824.1	126579	179151	NC_041321.1	10	12928023	12969703	NC_006088.5	1	18925596	18989763	33.92	31.71	1.04	0.06
zbed4	NW_003338824.1	187349	205894	NC_041321.1	10	12975483	12991215	NC_006088.5	1	18995439	19019861	18.36	19.58	0.92	-0.13
alg12	NW_003338824.1	211808	232561	NC_041321.1	10	12996591	13019317	NC_006088.5	1	19029127	19044919	33.3	33.25	0.98	-0.03
creld2	NW_003338824.1	235236	255266	NC_041321.1	10	13020155	13038471	NC_006088.5	1	19045073	19056005	35.13	33.98	1.01	0.01
pim3	NW_003338824.1	620982	627298	NC_041321.1	10	13950363	13956812	NC_006088.5	1	19333597	19338292	28.1	27.97	0.98	-0.03
il17rel	NW_003338824.1	1758427	1827384					NC_006088.5	1	20198058	20241024	32.09	32.13	0.98	-0.04
mlc1	5	63807006	63829717	NC_041321.1	10	15202429	15224906	NC_006088.5	1	20258069	20275058	31.77	33.46	0.93	-0.11
panx2	5	63901668	63936989	NC_041321.1	10	15106194	15152311	NC_006088.5	1	20328207	20349394	29.96	26.89	1.09	0.12
trabd	5	63968779	64001276	NC_041321.1	10	15031868	15068668	NC_006088.5	1	20383107	20415387	31.63	33.38	0.93	-0.11
tubgcp6	5	64040572	64079658	NC_041321.1	10	14967790	15002194	NC_006088.5	1	20464476	20487466	31.21	31.44	0.97	-0.04
hdac10	5	64084009	64123029	NC_041321.1	10	14931235	14955238	NC_006088.5	1	20487632	20503540	31.58	30.06	1.03	0.04
mapk12	5	64200483	64250989	NC_041321.1	10	14781942	14835453	NC_006088.5	1	20524505	20555654	34.49	37.38	0.9	-0.15
mapk11	5	64267950	64320316	NC_041321.1	10	14727745	14776648	NC_006088.5	1	20564339	20594716	29.31	31.92	0.9	-0.16
plxnb2	5	64420398	64860190	NC_041321.1	10	14500101	14614684	NC_006088.5	1	20647433	20898267	32.74	32.91	0.97	-0.04
znf800	5	65054520	65075185	NC_041321.1	10	15374305	15398096	NC_006088.5	1	20959037	21036750	40.75	33.04	1.2	0.27
grm8	5	65080574	65859146	NC_041321.1	10	15428390	16032149	NC_006088.5	1	21072255	21396652	38.19	30.52	1.22	0.29
pot1	5	66751865	66834755	NC_041321.1	10	16747181	16821355	NC_006088.5	1	21884111	21949081	27.93	28.92	0.94	-0.08
gpr37	5	66910390	66927530	NC_041321.1	10	16866943	16885945	NC_006088.5	1	21985328	21997138	22.11	18.85	1.15	0.2
lmod2	5	67443582	67459798	NC_041321.1	10	17307896	17322912	NC_006088.5	1	22419625	22425777	34	27.31	1.22	0.28
asb15	5	67476430	67499936	NC_041321.1	10	17333204	17349965	NC_006088.5	1	22434435	22445893	33.79	32.81	1.01	0.01
ndufa5	5	67499999	67504287	NC_041321.1	10	17411411	17415899	NC_006088.5	1	22449623	22454673	37.45	31.58	1.16	0.21
iqub	5	67509008	67555341	NC_041321.1	10	17418330	17457939	NC_006088.5	1	22454199	22477194	28.58	30.92	0.9	-0.15
atp6ap1	2	89829602	89842791	NC_041328.1	17	38973303	38986633	NC_006088.5	1	22485251	22539257	36.22	35.7	0.99	-0.01
slc13a1	5	67704015	67765881	NC_041321.1	10	17517012	17603241	NC_006088.5	1	22565946	22594889	34.52	31.73	1.06	0.09
fezf1	5	68320035	68333912	NC_041321.1	10	18135681	18141130	NC_006088.5	1	22978974	22982160	26.02	22.86	1.11	0.15
aass	5	68396825	68443534	NC_041321.1	10	18172573	18215668	NC_006088.5	1	23007392	23039846	31.96	33.54	0.93	-0.1
ptprz1	5	68455424	68576591	NC_041321.1	10	18220301	18329167	NC_006088.5	1	23043203	23177070	33.08	32.72	0.99	-0.02
fam3c	5	68760501	68813504	NC_041321.1	10	18455751	18467619	NC_006088.5	1	23351573	23381021	34.15	34.8	0.96	-0.06
wnt16	5	68819968	68824697	NC_041321.1	10	18470927	18482050	NC_006088.5	1	23385216	23397661	30.94	34.17	0.88	-0.18
cped1	5	63597730	63747373					NC_006088.5	1	23413120	23554790	34.61	32.28	1.05	0.07
ing3	5	63574705	63591921	NC_041321.1	10	18600322	18615380	NC_006088.5	1	23568698	23587079	35.36	31.62	1.09	0.13
tspan12	5	63345018	63444236	NC_041321.1	10	18644104	18745193	NC_006088.5	1	23608924	23654511	33.58	32.9	1	0
kcnd2	5	62958892	63332122	NC_041321.1	10	18751983	19032876	NC_006088.5	1	23659773	23928416	29.19	31.44	0.91	-0.14
lsm8	5	61933607	61995359	NC_041327.1	16	25297654	25300828	NC_006088.5	1	24489380	24495990	30.05	27.54	1.07	0.09
cftr	5	61523822	61638408	NC_041321.1	10	20060309	20149150	NC_006088.5	1	24696007	24780327	31.85	31.77	0.98	-0.03
asz1	5	61447848	61488129	NC_041321.1	10	20165160	20210059	NC_006088.5	1	24799480	24836289	38.41	35.22	1.07	0.09
st7	5	61311381	61442968	NC_041321.1	10	20216104	20315968	NC_006088.5	1	24857853	24995222	29.21	31.03	0.92	-0.12
capza2	5	61269520	61303959	NC_041321.1	10	20322164	20343108	NC_006088.5	1	25007203	25036930	34.18	33.44	1	0
met	5	61092367	61236188	NC_041321.1	10	20355755	20455767	NC_006088.5	1	25059900	25148633	34.94	33.43	1.02	0.03
cav1	5	60983400	61021428	NC_041321.1	10	20550698	20580293	NC_006088.5	1	25201919	25216271	20.72	18.77	1.08	0.11
cav2	5	60951564	60965779	NC_041321.1	10	20584272	20593205	NC_006088.5	1	25223560	25231414	26.84	25.13	1.04	0.06
tes	5	60741403	60790794	NC_041321.1	10	20683572	20713253	NC_006088.5	1	25316653	25342777	34.9	30.47	1.12	0.16
tfec	5	60455190	60561561	NC_041321.1	10	20791689	20865244	NC_006088.5	1	25430536	25492527	31.82	33.06	0.94	-0.09
mdfic	5	59669791	59720104	NC_041321.1	10	21366464	21404244	NC_006088.5	1	25905660	25954293	25.45	29.98	0.83	-0.27
foxp2	5	59060502	59502367	NC_041321.1	10	21519531	21880704	NC_006088.5	1	26047195	26460767	34.09	35.41	0.94	-0.09
ppp1r3a	5	58973620	59011756	NC_041321.1	10	21932739	21963199	NC_006088.5	1	26502841	26529712	33.74	32.55	1.01	0.02
gpr85	5	58698372	58703865	NC_041321.1	10	22141294	22146255	NC_006088.5	1	26817301	26823188	35.8	30.82	1.13	0.18
tmem168	5	58582570	58595431	NC_041321.1	10	22218964	22232619	NC_006088.5	1	26942362	26972265	36.23	33.73	1.05	0.07
lsmem1	5	58506829	58523531	NC_041321.1	10	22275724	22288031	NC_006088.5	1	27049097	27056263	34.93	27.37	1.25	0.32
ifrd1	5	58489632	58503648	NC_041321.1	10	22293080	22304755	NC_006088.5	1	27057991	27068584	34.91	40.62	0.84	-0.25
znf277	5	58379090	58426335	NC_041321.1	10	22342789	22383931	NC_006088.5	1	27109323	27163047	32.23	34.19	0.92	-0.12
dock4	5	58051107	58378981	NC_041321.1	10	22384093	22632230	NC_006088.5	1	27163248	27409762	31.6	31.85	0.97	-0.05
lrrn3	5	57717269	57770551	NC_041321.1	10	22802761	22850452	NC_006088.5	1	27615890	27653289	34.29	28.43	1.18	0.24
dnajb9	1	133488167	133499681	NC_041314.1	3	14230331	14239724	NC_006088.5	1	28562682	28571177	27.26	28.07	0.95	-0.08
thap5	1	133482914	133488039	NC_041314.1	3	14239835	14244828	NC_006088.5	1	28571393	28577816	29.8	36.62	0.79	-0.33
avpr2	2	88181923	88196672	NC_041328.1	17	40042011	40045886	NC_006088.5	1	28625801	28633253	30.56	33.38	0.89	-0.16
pnpla8	5	56401870	56439299	NC_041321.1	10	23636102	23667358	NC_006088.5	1	28650992	28687291	32.15	32.78	0.96	-0.06
nrcam	5	56209068	56390188	NC_041321.1	10	23676319	23811104	NC_006088.5	1	28703928	28846685	33.78	34.2	0.96	-0.05
cntn1	5	55976814	56163595	NC_041321.1	10	23847266	23998658	NC_006088.5	1	29035554	29120868	30.75	34.79	0.86	-0.21
gxylt1	5	55363250	55390356	NC_041321.1	10	24482295	24519166	NC_006088.5	1	29589322	29620400	29.64	30.62	0.95	-0.08
yaf2	5	55315461	55355400	NC_041321.1	10	24523912	24548696	NC_006088.5	1	29633507	29660476	36.61	29.11	1.23	0.3
zcrb1	5	55278916	55284175	NC_041321.1	10	24576434	24582833	NC_006088.5	1	29690803	29702642	29.84	33.13	0.88	-0.18
pphln1	5	55240708	55342133	NC_041321.1	10	24582973	24612170	NC_006088.5	1	29702686	29770996	30.31	31.87	0.93	-0.11
prickle1	5	55158489	55240605	NC_041321.1	10	24612941	24683927	NC_006088.5	1	29773408	29833531	32.39	31.63	1	0
adamts20	5	54722969	54794430	NC_041321.1	10	25025630	25106721	NC_006088.5	1	30042934	30129390	34.16	33.37	1	0
pus7l	5	54628045	54650385	NC_041321.1	10	25157089	25176524	NC_006088.5	1	30178852	30191169	28.94	31.62	0.89	-0.16
irak4	5	54611154	54625804	NC_041321.1	10	25176451	25190648	NC_006088.5	1	30191162	30204925	34.8	40.64	0.84	-0.26
twf1	5	54595231	54607204	NC_041321.1	10	25190911	25203917	NC_006088.5	1	30203889	30222348	28.3	29.12	0.95	-0.07
tmem117	5	54223780	54541110	NC_041321.1	10	25216804	25426475	NC_006088.5	1	30223377	30431485	28.83	34.9	0.81	-0.31
arrdc5	NW_003339208.1	260033	261469	NC_041329.1	18	2336228	2340640	NC_006088.5	1	30437661	30447582	34.82	32.68	1.04	0.06
nell2	5	54011549	54180040	NC_041321.1	10	25454887	25567736	NC_006088.5	1	30463157	30606604	36.46	34.41	1.04	0.05
dbx2	5	53927739	53957193	NC_041321.1	10	25598026	25610150	NC_006088.5	1	30657836	30682019	32.49	32	0.99	-0.01
ano6	5	53824535	53904160	NC_041321.1	10	25632753	25700016	NC_006088.5	1	30720814	30791204	34.44	31.78	1.06	0.08
arid2	5	53629612	53727478	NC_041321.1	10	25747656	25845607	NC_006088.5	1	30872230	30978877	32.56	33.61	0.95	-0.08
scaf11	5	53575586	53611497	NC_041321.1	10	25854605	25882893	NC_006088.5	1	30985382	31026937	31.53	31.91	0.97	-0.05
slc38a1	5	53479583	53541856	NC_041321.1	10	25900225	25938389	NC_006088.5	1	31051966	31090655	31.29	33.7	0.91	-0.14
slc38a2	5	53428199	53450572	NC_041321.1	10	25959700	25976378	NC_006088.5	1	31106674	31121733	34.07	30.72	1.08	0.12
slc38a4	5	53291877	53334774	NC_041321.1	10	26062501	26097252	NC_006088.5	1	31221754	31253966	34.87	34.56	0.99	-0.02
amigo2	5	53160681	53193462	NC_041321.1	10	26174482	26196482	NC_006088.5	1	31370359	31379889	27.15	31.24	0.85	-0.24
rpap3	5	52936558	52963357	NC_041321.1	10	26352012	26366044	NC_006088.5	1	31548261	31563213	27.91	29.85	0.91	-0.13
lrig3	5	52537129	52618153	NC_041321.1	10	26623381	26684704	NC_006088.5	1	31839397	31886512	33.06	35.86	0.9	-0.15
fam19a2	5	51263128	51452779					NC_006088.5	1	32825201	33005487	35.98	37.99	0.93	-0.11
usp15	5	51169118	51233212					NC_006088.5	1	33026379	33090152	32.85	31.92	1.01	0.01
mon2	5	51080986	51163033	NC_041321.1	10	27932089	27994337	NC_006088.5	1	33104506	33176133	33.01	32.94	0.98	-0.03
ppm1h	5	51014266	51059817	NC_041321.1	10	28011616	28097401	NC_006088.5	1	33207641	33342147	34.24	31.68	1.06	0.08
avpr1a	5	50861538	50877718	NC_041321.1	10	28156673	28166801	NC_006088.5	1	33419044	33421641	27.94	25.71	1.06	0.09
tmem5	5	50745899	50747418					NC_006088.5	1	33515763	33527383	33.28	27.63	1.18	0.23
srgap1	5	50572518	50710975	NC_041321.1	10	28299041	28409706	NC_006088.5	1	33560317	33701007	35.67	33.03	1.05	0.08
rpl18a	5	50519681	50525835	NC_041321.1	10	28435442	28441208	NC_006088.5	1	33723878	33726658	49.91	50.23	0.97	-0.04
xpot	5	50488469	50519162	NC_041321.1	10	28443193	28468460	NC_006088.5	1	33726821	33752538	35.41	36.57	0.95	-0.08
tbk1	5	50455142	50485107	NC_041321.1	10	28470896	28502282	NC_006088.5	1	33752711	33785156	34.17	32.32	1.03	0.05
rassf3	5	50371161	50377625	NC_041321.1	10	28504761	28561500	NC_006088.5	1	33784124	33887319	35.81	26.38	1.33	0.41
gns	5	50340492	50368751	NC_041321.1	10	28563455	28588364	NC_006088.5	1	33892987	33913536	51.53	49.6	1.01	0.02
tbc1d30	5	50266994	50300333	NC_041321.1	10	28592982	28635958	NC_006088.5	1	33914382	33964318	33.89	33.29	0.99	-0.01
wif1	5	50156764	50210444	NC_041321.1	10	28675884	28739646	NC_006088.5	1	34002232	34044011	32.12	28.95	1.08	0.12
lemd3	5	50105269	50132652	NC_041321.1	10	28759120	28780880	NC_006088.5	1	34057864	34106949	30.8	33.5	0.9	-0.16
msrb3	5	50022218	50097340	NC_041321.1	10	28782812	28844055	NC_006088.5	1	34107157	34191038	29.81	34.95	0.83	-0.26
hmga2	NW_003338803.1	99088	233537	NC_041321.1	10	28936340	29065952	NC_006088.5	1	34323957	34428910	25.4	29.08	0.85	-0.23
llph	NW_003338803.1	302325	305538	NC_041321.1	10	29117000	29123387	NC_006088.5	1	34487015	34489687	35.44	30.48	1.14	0.18
tmbim4	NW_003338803.1	309371	317327	NC_041321.1	10	29125338	29134845	NC_006088.5	1	34489858	34497727	33.48	31.5	1.04	0.05
helb	NW_003338803.1	338279	374621	NC_041321.1	10	29146164	29167984	NC_006088.5	1	34535761	34551314	31.85	29.09	1.07	0.1
grip1	NW_003338803.1	375656	664611	NC_041321.1	10	29169032	29505387	NC_006088.5	1	34551483	34857151	33.1	33.25	0.97	-0.04
cand1	NW_003338803.1	877271	910373	NC_041321.1	10	29587657	29611214	NC_006088.5	1	34900578	34929812	35.19	35.61	0.97	-0.05
dyrk2	NW_003338803.1	986388	1021742	NC_041321.1	10	29668547	29690101	NC_006088.5	1	35018899	35033353	30.87	26.12	1.15	0.21
mdm1	NW_003338803.1	1235565	1260160					NC_006088.5	1	35233247	35257618	31.81	36.85	0.84	-0.25
rap1b	NW_003338803.1	1334325	1375341	NC_041321.1	10	29915817	29944050	NC_006088.5	1	35332501	35366129	43.06	40.91	1.03	0.04
nup107	NW_003338803.1	1379507	1410655	NC_041321.1	10	29944807	29968772	NC_006088.5	1	35362957	35393184	32.6	33.51	0.95	-0.07
slc35e3	NW_003338803.1	1414402	1430279	NC_041321.1	10	29971639	29982532	NC_006088.5	1	35393882	35399422	31.14	31.21	0.97	-0.04
mdm2	NW_003338803.1	1440291	1454930	NC_041321.1	10	29986096	29999289	NC_006088.5	1	35415391	35431597	34.9	33.96	1	0.01
cpm	NW_003338803.1	1460388	1522555	NC_041321.1	10	30000097	30039006	NC_006088.5	1	35432767	35464324	34.38	30.97	1.08	0.12
cpsf6	NW_003338803.1	1527134	1549686	NC_041321.1	10	30054167	30080882	NC_006088.5	1	35503167	35532485	36.72	31.61	1.13	0.18
yeats4	NW_003338803.1	1569767	1574271	NC_041321.1	10	30087370	30093107	NC_006088.5	1	35546792	35549562	31.88	32.52	0.96	-0.06
frs2	NW_003338803.1	1582222	1635310	NC_041321.1	10	30103040	30134834	NC_006088.5	1	35563610	35617989	29.93	33.18	0.88	-0.18
cct2	NW_003338803.1	1643840	1654092	NC_041321.1	10	30143028	30153531	NC_006088.5	1	35620962	35632922	30.27	36.51	0.81	-0.3
lrrc10	NW_003338803.1	1649651	1658562	NC_041321.1	10	30154023	30155982	NC_006088.5	1	35634112	35636010	28.37	31.53	0.88	-0.19
best3	NW_003338803.1	1678078	1705674	NC_041321.1	10	30178358	30195666	NC_006088.5	1	35651352	35672051	32.84	36.43	0.88	-0.18
rab3ip	NW_003338803.1	1716616	1749070	NC_041321.1	10	30200819	30225466	NC_006088.5	1	35682030	35711342	34.09	31	1.07	0.1
myrfl	NW_003338803.1	1754592	1818618	NC_041321.1	10	30227612	30264658	NC_006088.5	1	35713725	35758730	35.09	35.41	0.97	-0.05
cnot2	NW_003338803.1	1870368	1936632	NC_041321.1	10	30300143	30356061	NC_006088.5	1	35841859	35931516	30.43	33.11	0.9	-0.16
kcnmb4	NW_003338803.1	1943354	2005931	NC_041321.1	10	30367061	30393995	NC_006088.5	1	35937978	35948946	29.97	26.71	1.1	0.13
ptprb	5	37885704	37979452	NC_041321.1	10	30421396	30492927	NC_006088.5	1	35958474	36039585	34.6	32.85	1.03	0.04
ptprr	5	37982884	38114654	NC_041321.1	10	30495110	30605829	NC_006088.5	1	36025148	36168886	33.12	30.53	1.06	0.08
tspan8	5	38175283	38197411	NC_041321.1	10	30657219	30679338	NC_006088.5	1	36249788	36266910	30.37	28.02	1.06	0.08
lgr5	5	38288953	38375499	NC_041321.1	10	30692538	30760369	NC_006088.5	1	36352053	36439081	30.92	30.9	0.98	-0.03
zfc3h1	5	38388271	38426644	NC_041321.1	10	30770209	30804545	NC_006088.5	1	36454504	36492362	33.75	32.89	1	0
tmem19	5	38447173	38474710	NC_041321.1	10	30822580	30833494	NC_006088.5	1	36511783	36525754	31.99	41.89	0.75	-0.42
rab21	5	38495619	38510611	NC_041321.1	10	30844076	30857008	NC_006088.5	1	36551646	36570900	33.8	27.69	1.19	0.25
tbc1d15	5	38519227	38546630	NC_041321.1	10	30860030	30884127	NC_006088.5	1	36575117	36602178	31.73	32.12	0.96	-0.05
tph2	5	38550479	38658896	NC_041321.1	10	30886923	30946616	NC_006088.5	1	36613330	36727660	33.39	34.89	0.93	-0.1
trhde	5	38762433	39134717	NC_041321.1	10	31037826	31233225	NC_006088.5	1	36731205	36958919	31.71	30.96	1	0
kcnc2	5	40072355	40180664	NC_041321.1	10	32090727	32186406	NC_006088.5	1	37711495	37808713	27.95	27.68	0.99	-0.02
caps2	5	40250881	40284732	NC_041321.1	10	32195276	32228791	NC_006088.5	1	37818227	37854189	34.27	35.55	0.94	-0.09
ccdc107	5	40286121	40293813	NC_041321.1	10	32229991	32237109	NC_006088.5	1	37854558	37861875	37.86	33.73	1.1	0.13
krr1	5	40379890	40389951	NC_041321.1	10	32297446	32305446	NC_006088.5	1	37893891	37899370	30.47	32.34	0.92	-0.12
phlda1	5	40551659	40552420	NC_041321.1	10	32437390	32440456	NC_006088.5	1	38017047	38021395	25.84	15.81	1.6	0.67
nap1l1	5	40559286	40576888	NC_041321.1	10	32447616	32472223	NC_006088.5	1	38027571	38055883	38.78	35.76	1.06	0.08
bbs10	4	5811547	5817918					NC_006088.5	1	38115003	38117194	34.72	26.56	1.28	0.35
osbpl8	5	40655266	40748374	NC_041321.1	10	32527665	32595569	NC_006088.5	1	38117295	38200139	32.62	31.81	1	0
zdhhc17	5	40797050	40850907	NC_041321.1	10	32620193	32669215	NC_006088.5	1	38250594	38316501	31.23	30.43	1	0
csrp2	5	40853512	40875010	NC_041321.1	10	32670127	32685952	NC_006088.5	1	38319984	38327780	57.47	67.89	0.83	-0.27
e2f7	5	40974987	41008777	NC_041321.1	10	32735964	32758299	NC_006088.5	1	38372676	38391456	33.25	32.9	0.99	-0.02
nav3	5	41142772	41742520	NC_041321.1	10	32863583	33331359	NC_006088.5	1	38477996	39006643	35.62	30.56	1.14	0.19
syt1	5	37671810	37799105	NC_041321.1	10	33534281	33879693	NC_006088.5	1	39190931	39536618	36.76	35.3	1.02	0.02
pawr	5	37520525	37617609	NC_041321.1	10	33894752	33957872	NC_006088.5	1	39558808	39631936	32.1	36.5	0.86	-0.22
ppp1r12a	5	37377425	37500424	NC_041321.1	10	33973132	34045082	NC_006088.5	1	39643443	39771697	35.58	32.79	1.06	0.08
rps16	5	37293992	37297922	NC_041321.1	10	34099580	34103855	NC_006088.5	1	39832993	39835918	34.82	29.8	1.14	0.19
otogl	5	37193102	37289371					NC_006088.5	1	39843114	39936453	33.74	32.45	1.02	0.02
ptprq	5	37064917	37176633	NC_041321.1	10	34193642	34299918	NC_006088.5	1	39960864	40064069	33.34	34.76	0.94	-0.09
myf6	5	37008951	37046293	NC_041321.1	10	34315129	34318552	NC_006088.5	1	40079800	40081925	17.08	21.67	0.77	-0.38
myf5	5	37006766	37018249	NC_041321.1	10	34329492	34340801	NC_006088.5	1	40085112	40086326	25.86	29.41	0.86	-0.22
acss3	5	36835797	36902471	NC_041321.1	10	34424416	34496215	NC_006088.5	1	40199384	40277516	33.75	33.41	0.99	-0.02
ppfia2	5	36500786	36844925	NC_041321.1	10	34487839	34766289	NC_006088.5	1	40279159	40580717	34.31	33.8	0.99	-0.01
ccdc59	5	36351439	36453349	NC_041321.1	10	34872564	34884608	NC_006088.5	1	40766555	40773010	32.06	34.1	0.92	-0.12
mettl25	5	36306155	36500678	NC_041321.1	10	34884829	34930285	NC_006088.5	1	40772913	40828784	28.99	27.82	1.02	0.03
tmtc2	5	35994444	36226434	NC_041321.1	10	34998025	35183945	NC_006088.5	1	40892777	41134585	33.72	31.97	1.03	0.04
slc6a15	5	35045787	35097133	NC_041321.1	10	35815529	35857094	NC_006088.5	1	41674174	41710399	31.22	27.36	1.11	0.16
lrriq1	5	34857166	34976340	NC_041321.1	10	35917159	36027241	NC_006088.5	1	41785730	41885679	30.53	30.92	0.96	-0.05
alx1	5	34785203	34835960	NC_041321.1	10	36048764	36080061	NC_006088.5	1	41898277	41919630	27.85	22.93	1.19	0.25
rassf9	5	34470154	34508934	NC_041321.1	10	36318002	36360476	NC_006088.5	1	42160404	42190042	33.64	32.12	1.02	0.03
nts	5	34420765	34441211	NC_041321.1	10	36378112	36392182	NC_006088.5	1	42207151	42223589	31.85	37.01	0.84	-0.25
mgat4c	5	33981941	34400679	NC_041321.1	10	36411192	36740474	NC_006088.5	1	42250725	42261771	29.78	32.14	0.91	-0.14
cep290	5	33470909	33531241	NC_041321.1	10	37052219	37099526	NC_006088.5	1	42836696	42887580	34.79	34.04	1	0
tmtc3	5	33424991	33470728	NC_041321.1	10	37100207	37142579	NC_006088.5	1	42898823	42946402	32.33	32.52	0.97	-0.04
kitlg	5	33232428	33342038	NC_041321.1	10	37202910	37306122	NC_006088.5	1	43015486	43066975	33.57	30.88	1.06	0.09
poc1b	5	32876752	32909948	NC_041321.1	10	37534066	37565516	NC_006088.5	1	43360801	43404429	32.69	34.44	0.93	-0.11
atp2b1	5	32760538	32854322	NC_041321.1	10	37577854	37644796	NC_006088.5	1	43425751	43483118	33.89	33.91	0.98	-0.03
epyc	5	32387315	32418658	NC_041321.1	10	37927773	37952085	NC_006088.5	1	43956043	43978617	36.21	33.94	1.04	0.06
kera	5	32369381	32376050	NC_041321.1	10	37958973	37964396	NC_006088.5	1	43997022	44011257	31.27	37.55	0.81	-0.3
lum	5	32341936	32353268	NC_041321.1	10	37973249	37984682	NC_006088.5	1	44018283	44030483	34.45	32.52	1.03	0.05
dcn	5	32290489	32331849	NC_041321.1	10	37993002	38022444	NC_006088.5	1	44051182	44089820	31.17	35.76	0.85	-0.23
btg1	5	31906152	31911831	NC_041321.1	10	38296228	38300747	NC_006088.5	1	44429366	44431896	34.23	31.34	1.07	0.09
plekhg7	5	31679781	31710803	NC_041321.1	10	38475627	38495214	NC_006088.5	1	44628739	44650844	33.07	31.81	1.02	0.02
eea1	5	31609726	31679265	NC_041321.1	10	38502250	38543401	NC_006088.5	1	44649240	44725767	33.57	33.3	0.98	-0.02
nudt4	5	31476142	31494120	NC_041321.1	10	38624356	38639961	NC_006088.5	1	44847297	44871215	31.99	28.93	1.08	0.11
ube2n	5	31453193	31471424	NC_041321.1	10	38642386	38658000	NC_006088.5	1	44872361	44891392	28.42	30.55	0.91	-0.14
mrpl42	5	31437436	31446295	NC_041321.1	10	38662073	38671549	NC_006088.5	1	44901296	44908503	36.19	31.05	1.14	0.19
socs2	5	31406188	31412376	NC_041321.1	10	38695098	38700254	NC_006088.5	1	44923675	44925349	39.53	26.67	1.45	0.53
cradd	5	31328902	31398521	NC_041321.1	10	38706650	38741328	NC_006088.5	1	44934651	45010549	30.79	38.49	0.78	-0.36
plxnc1	5	31206197	31272432	NC_041321.1	10	38786304	38843523	NC_006088.5	1	45094846	45164370	33.7	31.69	1.04	0.05
cep83	5	31172149	31205756	NC_041321.1	10	38814200	38868709	NC_006088.5	1	45164324	45188580	34.78	35.17	0.97	-0.05
tmcc3	5	31032937	31158943	NC_041321.1	10	38871785	38980976	NC_006088.5	1	45191562	45318003	35.04	28.59	1.2	0.26
snapc3	2	34996656	35026403	NC_041328.1	17	26045904	26075245	NC_006088.5	1	45273005	45274441	35.16	29.75	1.15	0.21
ndufa12	5	30996820	31006356	NC_041321.1	10	38997806	39005634	NC_006088.5	1	45339456	45346978	37.17	30.05	1.21	0.27
nr2c1	5	30972947	30994369	NC_041321.1	10	39008364	39030757	NC_006088.5	1	45354985	45399425	34.12	33.62	0.99	-0.01
fgd6	5	30896029	30964325	NC_041321.1	10	39034086	39090117	NC_006088.5	1	45402083	45470024	33.59	32.37	1.01	0.02
vezt	5	30862972	30895805	NC_041321.1	10	39090197	39121751	NC_006088.5	1	45470185	45562431	32.94	34.2	0.94	-0.09
metap2	5	30788785	30805577	NC_041321.1	10	39154497	39170086	NC_006088.5	1	45566403	45581188	33.94	35.61	0.93	-0.1
usp44	5	30763751	30785711	NC_041321.1	10	39173396	39185789	NC_006088.5	1	45583800	45601142	31.6	37.45	0.82	-0.28
ntn4	5	30687403	30745179	NC_041321.1	10	39219426	39266180	NC_006088.5	1	45628677	45665279	35.39	36.06	0.96	-0.06
snrpf	5	30641291	30645885	NC_041321.1	10	39296322	39302588	NC_006088.5	1	45696332	45697655	47.48	46.08	1.01	0.01
amdhd1	5	30588687	30611771	NC_041321.1	10	39319183	39330233	NC_006088.5	1	45700153	45708439	35.71	34.24	1.02	0.03
hal	5	30572150	30593176	NC_041321.1	10	39331139	39345382	NC_006088.5	1	45708699	45722994	33.45	29.06	1.12	0.17
lta4h	5	30548386	30570027	NC_041321.1	10	39347794	39364367	NC_006088.5	1	45725938	45740581	33.38	27.46	1.19	0.25
elk3	5	30458374	30518407	NC_041321.1	10	39411584	39453585	NC_006088.5	1	45781411	45815589	40.26	31.45	1.25	0.32
cdk17	5	30362729	30456409	NC_041321.1	10	39459195	39529340	NC_006088.5	1	45818676	45909523	29.45	32.45	0.89	-0.17
cfap54	5	30178696	30329798					NC_006088.5	1	45929170	46037247	35.12	36.13	0.95	-0.07
nedd1	5	30142422	30170280	NC_041321.1	10	39683657	39717590	NC_006088.5	1	46042534	46066139	32.08	32.9	0.95	-0.07
tmpo	5	29346269	29364068	NC_041321.1	10	40319708	40337457	NC_006088.5	1	46668937	46691164	33.31	32.13	1.01	0.02
ikbip	5	29307618	29320630	NC_041321.1	10	40351985	40358838	NC_006088.5	1	46708172	46717161	32.14	28	1.12	0.17
apaf1	5	29245419	29303344	NC_041321.1	10	40359051	40400101	NC_006088.5	1	46717305	46744994	31.89	34.54	0.9	-0.15
uhrf1bp1l	5	28735599	28795413	NC_041321.1	10	40736063	40768999	NC_006088.5	1	47184016	47238308	32.89	31.36	1.02	0.03
actr6	5	28714201	28728371	NC_041321.1	10	40770350	40778749	NC_006088.5	1	47242488	47251479	36.14	35.2	1	0
scyl2	5	28675432	28710916	NC_041321.1	10	40780825	40808010	NC_006088.5	1	47252652	47287637	33.39	33.71	0.97	-0.05
slc17a8	5	28646006	28671803	NC_041321.1	10	40812078	40834325	NC_006088.5	1	47292762	47320594	33.26	33.53	0.97	-0.05
nr1h4	5	28595389	28632377	NC_041321.1	10	40843929	40876597	NC_006088.5	1	47342861	47375651	35.3	35.32	0.98	-0.03
gas2l3	5	28566556	28590202	NC_041321.1	10	40879759	40902635	NC_006088.5	1	47376059	47394614	38.94	33.21	1.15	0.2
ano4	5	28385449	28492517	NC_041321.1	10	40934137	41058745	NC_006088.5	1	47433228	47611336	33.17	33.22	0.98	-0.04
utp20	5	28222849	28302660	NC_041321.1	10	41146659	41207980	NC_006088.5	1	47648304	47708169	34.87	34.26	0.99	-0.01
arl1	5	28216840	28222365	NC_041321.1	10	41209026	41214931	NC_006088.5	1	47708240	47713703	34.56	30.08	1.12	0.17
nup205	5	28171563	28213979	NC_041321.1	10	41216376	41235490	NC_006088.5	1	47715105	47760658	35.16	33.11	1.04	0.05
cnot4	5	28085679	28160402	NC_041321.1	10	41262482	41316011	NC_006088.5	1	47775897	47861441	33.09	33.06	0.98	-0.03
stra8	5	27969410	27998492	NC_041321.1	10	41383453	41400368	NC_006088.5	1	47889127	47902219	34.85	32.71	1.04	0.06
wdr91	5	27940692	27964516	NC_041321.1	10	41400455	41417337	NC_006088.5	1	47904971	47919973	32.66	33.73	0.95	-0.08
tmem140				NC_041321.1	10	41423108	41431120	NC_006088.5	1	47922676	47927316	30.51	34.48	0.86	-0.21
agbl3	5	27857133	27914822	NC_041321.1	10	41433619	41467269	NC_006088.5	1	47929926	47947169	32.9	32.23	1	0
pde6h	5	27839326	27848756	NC_041321.1	10	41472584	41486592	NC_006088.5	1	47967698	47976083	33.12	29.72	1.09	0.12
arhgdib	5	27793927	27818913	NC_041321.1	10	41500847	41517372	NC_006088.5	1	47986222	47995411	33.48	31.18	1.05	0.07
mgp				NC_041321.1	10	41580727	41591838	NC_006088.5	1	48028796	48034029	34.96	28.72	1.19	0.25
smco3	5	27679026	27682045	NC_041321.1	10	41610680	41614232	NC_006088.5	1	48051075	48054373	35.74	38.62	0.9	-0.15
wbp11	5	27657837	27675516	NC_041321.1	10	41624196	41635972	NC_006088.5	1	48056248	48065830	31.84	27.37	1.14	0.18
ddx47	5	27574746	27588749	NC_041321.1	10	41738515	41750797	NC_006088.5	1	48200510	48209395	30.9	30.9	0.98	-0.03
gprc5a	5	27526802	27555317	NC_041321.1	10	41781086	41790188	NC_006088.5	1	48223902	48230214	38.84	32.79	1.16	0.21
hebp1	5	27471667	27480613	NC_041321.1	10	41822400	41830533	NC_006088.5	1	48243499	48259557	34.3	30.68	1.09	0.13
fam234b	NW_003338944.1	865700	901610	NC_041321.1	10	41870262	41899849	NC_006088.5	1	48265085	48286902	33.33	33	0.99	-0.02
gsg1	NW_003338944.1	842979	862177	NC_041321.1	10	41900618	41917075	NC_006088.5	1	48286837	48299555	37.3	31.5	1.16	0.21
emp1	NW_003338944.1	761099	794229	NC_041321.1	10	41953137	41982583	NC_006088.5	1	48327380	48341583	30.95	31.18	0.97	-0.04
grin2b	NW_003338944.1	188429	507718	NC_041321.1	10	42176806	42451799	NC_006088.5	1	48457440	48673018	37.1	37.22	0.97	-0.04
atf7ip	NW_003339261.1	116143	214059	NC_041321.1	10	42610786	42697031	NC_006088.5	1	48792292	48903334	28.37	32.02	0.87	-0.21
plbd1	NW_003339261.1	76166	104143	NC_041321.1	10	42703032	42732663	NC_006088.5	1	48904685	48942465	39.03	32.56	1.17	0.23
gucy2c	NW_003339261.1	335	56631	NC_041321.1	10	42733640	42788115	NC_006088.5	1	48944948	48990651	34.88	31.08	1.1	0.13
ttc26	NW_003339161.1	321188	351354	NC_041321.1	10	42790874	42814345	NC_006088.5	1	49002307	49048653	35	32.64	1.05	0.07
ubn2	NW_003339161.1	267575	319247	NC_041321.1	10	42815997	42861092	NC_006088.5	1	49060342	49117023	32.21	30.63	1.03	0.04
poldip3	NW_003339161.1	203006	219961	NC_041321.1	10	42903138	42915116	NC_006088.5	1	49183466	49197408	34.27	33.3	1.01	0.01
rrp7a	NW_003339161.1	190892	201112	NC_041321.1	10	42917017	42930648	NC_006088.5	1	49200811	49204428	32.93	32.63	0.99	-0.02
serhl2				NC_041321.1	10	42926418	42950036	NC_006088.5	1	49205225	49213440	35.23	34.15	1.01	0.01
nfam1	NW_003339161.1	88846	123220	NC_041321.1	10	42961493	42977759	NC_006088.5	1	49248294	49268747	34.42	40.63	0.83	-0.27
tcf20	5	27269549	27414095	NC_041321.1	10	42984815	43187910	NC_006088.5	1	49276282	49391792	35.15	30.19	1.14	0.19
ndufa6	5	27098336	27101656	NC_041321.1	10	43256511	43259529	NC_006088.5	1	49418394	49419964	45.35	33.34	1.33	0.41
smdt1	5	27093246	27097140	NC_041321.1	10	43263417	43266515	NC_006088.5	1	49420740	49422778	54.86	41.96	1.28	0.35
fam109b	5	27082795	27086784					NC_006088.5	1	49422881	49428092	34.04	37.85	0.88	-0.19
naga	5	27064670	27079269	NC_041321.1	10	43275860	43294321	NC_006088.5	1	49428093	49432399	35.43	29.05	1.19	0.25
wbp2nl	5	27045253	27060287	NC_041321.1	10	43295962	43308082	NC_006088.5	1	49432935	49440752	32.61	27.66	1.15	0.2
cenpm	5	26972002	26979779	NC_041321.1	10	43387183	43394142	NC_006088.5	1	49461989	49468898	36.48	34.43	1.04	0.05
shisa8	5	26793046	26856758	NC_041321.1	10	43482535	43515884	NC_006088.5	1	49487083	49494074	32.74	28.18	1.13	0.18
srebf2	5	26749101	26785298	NC_041321.1	10	43522657	43557914	NC_006088.5	1	49493089	49511605	31.48	31.74	0.97	-0.05
ccdc134	5	26710272	26740271	NC_041321.1	10	43562026	43586775	NC_006088.5	1	49511855	49516275	34.36	30.4	1.1	0.14
mei1	5	26643982	26707709	NC_041321.1	10	43590149	43627334	NC_006088.5	1	49519910	49553734	36	35.45	0.99	-0.01
snu13	5	26639295	26642039	NC_041321.1	10	43627367	43631244	NC_006088.5	1	49554205	49555495	41.17	35.37	1.14	0.19
xrcc6	5	26617532	26637341	NC_041321.1	10	43631785	43646648	NC_006088.5	1	49558421	49571511	33.78	32.38	1.02	0.03
desi1	5	26603918	26617450	NC_041321.1	10	43647852	43659562	NC_006088.5	1	49571843	49585200	30.91	32.3	0.93	-0.1
pmm1	5	26565905	26588703	NC_041321.1	10	43667289	43684086	NC_006088.5	1	49586497	49592152	32.52	34.44	0.92	-0.12
csdc2	5	26534898	26559599	NC_041321.1	10	43692169	43705340	NC_006088.5	1	49592787	49597289	36.82	29.99	1.2	0.26
polr3h	5	28163654	28171331	NC_041321.1	10	41240918	41249594	NC_006088.5	1	49601069	49607431	37.99	33.65	1.1	0.14
aco2	5	26496984	26521999	NC_041321.1	10	43718146	43741691	NC_006088.5	1	49608449	49628876	35.45	32.83	1.05	0.08
phf5a	5	26478549	26496864	NC_041321.1	10	43742115	43750763	NC_006088.5	1	49629138	49635168	41.23	37.81	1.07	0.09
tob2	5	26450274	26465211	NC_041321.1	10	43760811	43772454	NC_006088.5	1	49639915	49646718	31.95	28.87	1.08	0.11
tef	5	26373861	26403195	NC_041321.1	10	43794973	43825749	NC_006088.5	1	49664271	49678819	33.3	34.77	0.94	-0.1
zc3h7b	5	26304921	26356108	NC_041321.1	10	43833023	43883135	NC_006088.5	1	49686053	49731499	35.14	34.79	0.99	-0.02
rangap1	5	26275972	26299885	NC_041321.1	10	43883391	43906487	NC_006088.5	1	49734272	49753468	33.98	33.02	1.01	0.01
chadl	5	26241138	26250854	NC_041321.1	10	43929071	43937934	NC_006088.5	1	49752871	49758232	32.1	40.35	0.78	-0.36
l3mbtl2	5	26199848	26238936	NC_041321.1	10	43939570	43965419	NC_006088.5	1	49759019	49773636	32.23	29.78	1.06	0.08
ep300	5	26108885	26192195	NC_041321.1	10	43973792	44053371	NC_006088.5	1	49778616	49836401	38.25	36.57	1.02	0.03
rbx1	5	26051840	26056647	NC_041321.1	10	44083214	44089739	NC_006088.5	1	49860867	49871899	35.59	37.87	0.92	-0.12
xpnpep3	5	26014530	26046142	NC_041321.1	10	44092547	44119916	NC_006088.5	1	49892527	49906193	38.77	33.56	1.13	0.17
st13	5	25990346	26014210	NC_041321.1	10	44120414	44141514	NC_006088.5	1	49906150	49926208	34.99	31.75	1.08	0.11
slc25a17	5	25954087	25971244	NC_041321.1	10	44143048	44154924	NC_006088.5	1	49931478	49945613	39.42	40.74	0.95	-0.08
mkl1	5	25827597	25882796					NC_006088.5	1	49964174	50062126	32.64	33.03	0.97	-0.05
sgsm3	5	25787934	25827158	NC_041321.1	10	44244705	44274880	NC_006088.5	1	50062790	50089285	34.73	31.71	1.07	0.1
adsl	5	25754968	25780090	NC_041321.1	10	44283860	44304478	NC_006088.5	1	50091086	50106678	31.14	35.31	0.86	-0.22
tnrc6b	5	25626612	25748092	NC_041321.1	10	44307554	44409688	NC_006088.5	1	50107385	50247891	32.86	31.76	1.01	0.02
fam83f	5	25561416	25596036	NC_041321.1	10	44421269	44447436	NC_006088.5	1	50258017	50279008	33.67	31.81	1.03	0.05
grap2	5	25471303	25538839	NC_041321.1	10	44487716	44526633	NC_006088.5	1	50299443	50339298	30.66	34.85	0.86	-0.22
cacna1i	5	25032262	25380663	NC_041321.1	10	44607216	44896577	NC_006088.5	1	50410283	50568477	34.5	32.62	1.03	0.05
rps19bp1	5	24914083	24918284	NC_041321.1	10	44970678	44975321	NC_006088.5	1	50591189	50593314	34.57	29.97	1.13	0.17
atf4	5	24909523	24913204	NC_041321.1	10	44976695	44979760	NC_006088.5	1	50599342	50602277	34.96	34.47	0.99	-0.01
mief1	5	24890555	24897466	NC_041321.1	10	44989634	44997223	NC_006088.5	1	50610937	50621079	35.28	37.27	0.92	-0.11
mgat3	5	24817113	24866207	NC_041321.1	10	45009887	45079887	NC_006088.5	1	50628568	50653184	37.13	31.26	1.16	0.21
tab1	5	24706861	24725636	NC_041321.1	10	45128160	45140566	NC_006088.5	1	50660192	50668667	33.81	32.97	1	0
syngr1	5	24659688	24699755	NC_041321.1	10	45148296	45176397	NC_006088.5	1	50674047	50687764	39.67	27.65	1.4	0.49
rpl3	5	24634920	24644638	NC_041321.1	10	45183397	45190986	NC_006088.5	1	50691590	50697390	33.28	38.02	0.86	-0.23
pdgfb	5	24499105	24555928	NC_041321.1	10	45229618	45289678	NC_006088.5	1	50720076	50737739	37.44	24.65	1.48	0.57
cbx7	5	24407068	24429136	NC_041321.1	10	45336823	45362022	NC_006088.5	1	50752432	50768652	29.66	29.35	0.99	-0.02
cbx6	5	24374676	24386303	NC_041321.1	10	45370304	45389653	NC_006088.5	1	50770122	50781202	28.15	30.47	0.9	-0.15
nptxr	5	24306549	24345084	NC_041321.1	10	45400243	45427198	NC_006088.5	1	50780559	50791926	30.49	27.75	1.07	0.1
dnal4	5	24277436	24291803	NC_041321.1	10	45435935	45443496	NC_006088.5	1	50795057	50799333	33.23	31.51	1.03	0.04
sun2	5	24201319	24240944	NC_041321.1	10	45471851	45504742	NC_006088.5	1	50808312	50816242	34.3	33.24	1.01	0.01
gtpbp1	5	24171353	24195016	NC_041321.1	10	45505267	45525786	NC_006088.5	1	50816873	50834079	34.45	37.06	0.91	-0.14
josd1	5	24155960	24166202	NC_041321.1	10	45530333	45537877	NC_006088.5	1	50834570	50844965	35.79	34.46	1.01	0.02
cby1	5	24135376	24142080	NC_041321.1	10	45544255	45550491	NC_006088.5	1	50847151	50849565	31.67	31.21	0.99	-0.01
dmc1	5	24081159	24100776	NC_041321.1	10	45575618	45596836	NC_006088.5	1	50860962	50876561	34.9	32.29	1.06	0.08
ddx17	NW_003339007.1	630889	647809	NC_041321.1	10	45598545	45616121	NC_006088.5	1	50877342	50897171	36.72	31.15	1.15	0.2
kdelr3	NW_003339007.1	615469	624098	NC_041321.1	10	45617567	45626697	NC_006088.5	1	50897173	50902281	29.69	36.45	0.8	-0.33
kcnj4	NW_003339007.1	565395	601055	NC_041321.1	10	45642032	45669405	NC_006088.5	1	50904783	50917222	33.78	34.57	0.95	-0.07
csnk1e	NW_003339007.1	472878	561527	NC_041321.1	10	45697202	45740328	NC_006088.5	1	50927995	50948452	35.28	37.29	0.92	-0.11
tmem184b	NW_003339007.1	391865	449107	NC_041321.1	10	45754493	45789917	NC_006088.5	1	50950290	50975893	32.89	33.84	0.95	-0.07
maff	NW_003339007.1	354470	386380	NC_041321.1	10	45801204	45823236	NC_006088.5	1	50976154	50979173	34.29	35.2	0.95	-0.07
pla2g6	NW_003339007.1	329139	345833	NC_041321.1	10	45828206	45856021	NC_006088.5	1	50979505	50998680	36.43	34.82	1.02	0.03
baiap2l2	NW_003339007.1	300429	326685	NC_041321.1	10	45857954	45881500	NC_006088.5	1	50999536	51007565	35.08	31.3	1.09	0.13
slc16a8	NW_003339007.1	271070	279493	NC_041321.1	10	45887504	45899729	NC_006088.5	1	51008968	51016634	30.77	28.59	1.05	0.07
pick1	NW_003339007.1	234583	254227	NC_041321.1	10	45904893	45916962	NC_006088.5	1	51019124	51030492	32.1	29.64	1.06	0.08
sox10	NW_003339007.1	123353	153282	NC_041321.1	10	45973383	45999677	NC_006088.5	1	51055238	51064412	33.12	37.84	0.86	-0.23
polr2f	NW_003339007.1	107606	115361	NC_041321.1	10	46006808	46013089	NC_006088.5	1	51067329	51070898	35.29	33.09	1.04	0.06
micall1	NW_003339007.1	59062	98770	NC_041321.1	10	46037384	46069193	NC_006088.5	1	51075313	51093487	30.84	29.42	1.02	0.03
eif3l	NW_003339007.1	28639	38520	NC_041321.1	10	46077669	46092639	NC_006088.5	1	51097089	51106702	32.62	31.52	1.01	0.02
ankrd54	NW_003339007.1	14720	26018	NC_041321.1	10	46096037	46105808	NC_006088.5	1	51106966	51112471	33.24	29.43	1.1	0.14
galr3	5	24039485	24050649	NC_041321.1	10	46138271	46148068	NC_006088.5	1	51117014	51118848	35.86	29.03	1.21	0.27
gcat	5	24004709	24019295	NC_041321.1	10	46162961	46175628	NC_006088.5	1	51123897	51128173	31.96	32.25	0.97	-0.05
triobp	5	23891115	23978257	NC_041321.1	10	46189770	46251516	NC_006088.5	1	51133275	51146210	30.11	30.36	0.97	-0.05
nol12	5	23870134	23882460	NC_041321.1	10	46260855	46270002	NC_006088.5	1	51151529	51155415	30.16	30.79	0.96	-0.06
lgals1	5	23830133	23839765	NC_041321.1	10	46294717	46301876	NC_006088.5	1	51166506	51169638	35.73	34.24	1.02	0.03
pdxp	5	23802486	23807157					NC_006088.5	1	51181685	51185095	31.33	25.2	1.21	0.28
sh3bp1	5	23763651	23796937	NC_041321.1	10	46318471	46358297	NC_006088.5	1	51185448	51194194	32.24	30.44	1.03	0.05
gga1	5	23732517	23753602	NC_041321.1	10	46365459	46384187	NC_006088.5	1	51195008	51205252	30.45	30.8	0.97	-0.05
cdc42ep1	5	23620627	23652214	NC_041321.1	10	46435232	46452544	NC_006088.5	1	51220212	51228860	25.95	29.9	0.85	-0.24
card10	5	23489523	23564727	NC_041321.1	10	46511062	46561603	NC_006088.5	1	51230018	51252530	32.74	31.35	1.02	0.03
mfng	5	23434992	23469511	NC_041321.1	10	46574377	46601231	NC_006088.5	1	51255626	51271322	32.52	34.61	0.92	-0.12
elfn2	5	23137145	23337301	NC_041321.1	10	46664252	46807081	NC_006088.5	1	51286507	51341743	28.87	32.02	0.88	-0.18
rac2	5	22870444	22888550	NC_041321.1	10	46982698	46999849	NC_006088.5	1	51413925	51423026	36.01	32.61	1.08	0.11
sstr3	5	22843798	22862114	NC_041321.1	10	47009357	47019123	NC_006088.5	1	51425934	51432847	31.45	28.96	1.06	0.09
c1qtnf6	5	22811822	22820331	NC_041321.1	10	47048446	47057045	NC_006088.5	1	51437318	51445554	38.68	24.1	1.57	0.65
il2rb	5	22755792	22783338	NC_041321.1	10	47079465	47118570	NC_006088.5	1	51457537	51470898	37.65	33.36	1.1	0.14
tmprss6	5	22714647	22752455	NC_041321.1	10	47127495	47157181	NC_006088.5	1	51471209	51492639	30.45	29.23	1.02	0.03
kctd17	5	22693482	22712636	NC_041321.1	10	47145688	47179052	NC_006088.5	1	51493520	51501758	33.4	24.61	1.33	0.41
mpst	5	22676536	22688136	NC_041321.1	10	47183814	47191577	NC_006088.5	1	51508592	51511467	27.03	28.85	0.92	-0.13
tst	5	22665428	22676389	NC_041321.1	10	47191676	47199005	NC_006088.5	1	51511600	51518776	30.4	36.06	0.82	-0.28
tex33	5	22654726	22663553	NC_041321.1	10	47199198	47210665	NC_006088.5	1	51518927	51524410	34.27	25.55	1.31	0.39
csf2rb	5	22619421	22651692	NC_041321.1	10	47218248	47242391	NC_006088.5	1	51541951	51552677	31.44	28.16	1.09	0.13
ncf4	5	22599938	22615832	NC_041321.1	10	47245403	47259508	NC_006088.5	1	51574099	51608248	31.24	32.9	0.93	-0.11
pvalb	5	22524883	22558447	NC_041321.1	10	47297573	47317098	NC_006088.5	1	51605697	51618689	35.33	29.74	1.16	0.21
ift27	5	22486917	22498759	NC_041321.1	10	47345636	47354407	NC_006088.5	1	51627044	51649670	29.46	31.45	0.92	-0.13
cacng2	5	22281282	22446303	NC_041321.1	10	47395964	47518832	NC_006088.5	1	51651263	51698917	31.63	31.21	0.99	-0.01
eif3d	5	22228345	22243269	NC_041321.1	10	47540734	47552707	NC_006088.5	1	51709015	51716388	31.7	34.77	0.89	-0.17
foxred2	5	22200297	22225031	NC_041321.1	10	47555212	47567659	NC_006088.5	1	51716509	51726944	30.75	32.94	0.91	-0.13
txn2	5	22178755	22196849	NC_041321.1	10	47569218	47581493	NC_006088.5	1	51725085	51734739	40.21	32.69	1.2	0.26
myh9	5	22050233	22136760	NC_041321.1	10	47605603	47686731	NC_006088.5	1	51734199	51820934	35.92	33.9	1.04	0.05
rbfox2	5	21802182	22040502	NC_041321.1	10	47703684	47878105	NC_006088.5	1	51831360	51994882	28.43	29.48	0.94	-0.09
mb	5	21735324	21747314	NC_041321.1	10	47941536	47947403	NC_006088.5	1	52004052	52007757	29.09	34.4	0.83	-0.28
rasd2	5	21665917	21682332	NC_041321.1	10	47986187	47997448	NC_006088.5	1	52034433	52042836	36.15	36.84	0.96	-0.06
mcm5	5	21499540	21521848	NC_041321.1	10	48084047	48114254	NC_006088.5	1	52093780	52102037	32.79	32.94	0.97	-0.04
hmox1	5	21483435	21496261	NC_041321.1	10	48118666	48127935	NC_006088.5	1	52103885	52109345	35.03	30.37	1.13	0.17
tom1	5	21440492	21466894	NC_041321.1	10	48141790	48173549	NC_006088.5	1	52116686	52137393	31.48	28.6	1.08	0.1
hmgxb4	5	21405691	21424523	NC_041321.1	10	48175411	48195948	NC_006088.5	1	52137539	52151831	34.55	33.81	1	0
syn3	5	19954015	20198340	NC_041321.1	10	49201860	49389668	NC_006088.5	1	53021674	53226639	31.57	34.02	0.91	-0.14
timp3	5	20090572	20129020	NC_041321.1	10	49259663	49305890	NC_006088.5	1	53095025	53127489	33.29	30.72	1.06	0.08
fbxo7	5	19933309	19950325	NC_041321.1	10	49389811	49403074	NC_006088.5	1	53227761	53241371	30	28.72	1.02	0.03
rtcb	5	19883301	19895612	NC_041321.1	10	49427399	49446577	NC_006088.5	1	53286595	53300334	32.74	30.24	1.06	0.08
ascl4	5	19864309	19866636	NC_041321.1	10	49463890	49465127	NC_006088.5	1	53317314	53320493	32.79	20.96	1.53	0.61
prdm4	5	19839754	19859268	NC_041321.1	10	49471085	49489452	NC_006088.5	1	53325222	53342887	35.9	32.74	1.07	0.1
pwp1	5	19815611	19839518	NC_041321.1	10	49488806	49505503	NC_006088.5	1	53343402	53357765	31.64	29.62	1.04	0.06
btbd11				NC_041321.1	10	49509934	49729533	NC_006088.5	1	53370683	53545366	30	31.28	0.94	-0.09
cry1	5	19435727	19474281	NC_041321.1	10	49769445	49800743	NC_006088.5	1	53592038	53626354	35.05	32.85	1.04	0.06
mterf2	5	19415168	19431162	NC_041321.1	10	49806063	49810063	NC_006088.5	1	53628295	53634019	37.02	30.84	1.17	0.23
tmem263	5	19402045	19414172	NC_041321.1	10	49810571	49823912	NC_006088.5	1	53635741	53648634	30.59	31.4	0.95	-0.07
ric8b	5	19341617	19377083	NC_041321.1	10	49840727	49873265	NC_006088.5	1	53674213	53707542	34.77	34.94	0.97	-0.04
rfx4	5	19273152	19333422	NC_041321.1	10	49880554	49943557	NC_006088.5	1	53711870	53803086	34.16	33.67	0.99	-0.01
polr3b	5	19168103	19229872	NC_041321.1	10	49953076	50014724	NC_006088.5	1	53811388	53878924	33.6	32.46	1.01	0.02
tcp11l2	5	19138005	19162337	NC_041321.1	10	50016424	50038160	NC_006088.5	1	53881510	53898081	31.33	33.33	0.92	-0.12
ckap4	5	19117430	19125572	NC_041321.1	10	50040873	50049126	NC_006088.5	1	53900487	53910370	35.85	29.56	1.18	0.24
nuak1	5	19035639	19095050	NC_041321.1	10	50091866	50140468	NC_006088.5	1	53933009	53980840	32.62	30.77	1.04	0.05
appl2	5	18797461	18831632	NC_041321.1	10	50339256	50368615	NC_006088.5	1	54211697	54244859	32.33	30.72	1.03	0.04
aldh1l2	5	18709257	18740824	NC_041321.1	10	50421327	50453166	NC_006088.5	1	54291208	54320813	37.57	30.83	1.19	0.25
slc41a2	5	18632702	18684901	NC_041321.1	10	50471339	50512000	NC_006088.5	1	54325219	54374350	30.33	32.55	0.91	-0.14
chst11	5	18382301	18612559	NC_041321.1	10	50517181	50679921	NC_006088.5	1	54383572	54542973	31.23	28.13	1.08	0.12
nfyb	5	18257773	18273445	NC_041321.1	10	50772309	50784832	NC_006088.5	1	54636779	54660850	32.1	33.91	0.92	-0.11
hcfc2	5	18230286	18255801	NC_041321.1	10	50786982	50814081	NC_006088.5	1	54653294	54674193	30.11	31.37	0.94	-0.09
glt8d2	5	18208997	18222037	NC_041321.1	10	50819524	50833099	NC_006088.5	1	54677179	54693103	36.53	33.47	1.07	0.09
tdg	5	18190554	18206562	NC_041321.1	10	50835064	50846181	NC_006088.5	1	54693127	54703634	28.71	31.34	0.89	-0.16
hsp90b1	5	18171728	18182185	NC_041321.1	10	50850786	50864858	NC_006088.5	1	54709107	54718953	32.77	33.69	0.95	-0.07
nt5dc3	5	18122123	18154085	NC_041321.1	10	50866519	50912631	NC_006088.5	1	54748397	54770546	35.1	36	0.95	-0.07
stab2	5	18037859	18122192	NC_041321.1	10	50913296	50998347	NC_006088.5	1	54769157	54844868	32.71	31.54	1.01	0.02
ascl1	5	17840587	17846829	NC_041321.1	10	51172439	51176601	NC_006088.5	1	55066360	55068371	16.52	21.9	0.74	-0.44
pah				NC_041321.1	10	51188285	51227201	NC_006088.5	1	55078825	55114899	30.62	31.72	0.94	-0.08
igf1	5	17591811	17674158	NC_041321.1	10	51316868	51381226	NC_006088.5	1	55281097	55329525	32.89	36.39	0.88	-0.18
parpbp	5	17535789	17558341	NC_041321.1	10	51406644	51433110	NC_006088.5	1	55369758	55417957	32.39	31.13	1.02	0.02
pmch	5	17558393	17560413	NC_041321.1	10	51401106	51406612	NC_006088.5	1	55372262	55373651	30.9	26.17	1.15	0.21
nup37	5	17511678	17535773	NC_041321.1	10	51433125	51454531	NC_006088.5	1	55417988	55442133	30.46	30.77	0.97	-0.05
dram1	5	17451635	17473623	NC_041321.1	10	51494959	51509429	NC_006088.5	1	55492480	55507806	33.42	29.01	1.13	0.17
sycp3	5	17374298	17383833	NC_041321.1	10	51557650	51571246	NC_006088.5	1	55559464	55572402	38.63	45.17	0.84	-0.26
chpt1	5	17345544	17375245	NC_041321.1	10	51570474	51590670	NC_006088.5	1	55570859	55591296	36.54	33.66	1.06	0.08
mybpc1	5	17238983	17338942	NC_041321.1	10	51596324	51670209	NC_006088.5	1	55597282	55669221	35.23	32.2	1.07	0.1
spic	5	17187844	17197154	NC_041321.1	10	51712213	51717428	NC_006088.5	1	55701730	55729543	28.69	29.57	0.95	-0.08
parp12								NC_006088.5	1	55732612	55749486	29.33	28.98	0.99	-0.02
hipk2	5	16674536	16846303	NC_041321.1	10	52008137	52167880	NC_006088.5	1	56021388	56145342	32.3	33.3	0.95	-0.08
kiaa1549	5	16489845	16638650	NC_041321.1	10	52195339	52298785	NC_006088.5	1	56152240	56310825	33.99	32.46	1.02	0.03
tmem213	5	16470330	16476360	NC_041321.1	10	52308452	52311940	NC_006088.5	1	56319742	56323845	41.11	33.34	1.2	0.27
atp6v0a4	5	16454102	16460833	NC_041321.1	10	52323585	52358703	NC_006088.5	1	56329183	56352045	36.05	33.7	1.04	0.06
svopl	5	14919261	14949760	NC_041321.1	10	52366582	52392306	NC_006088.5	1	56352657	56378866	33.19	32.93	0.98	-0.02
trim24	5	14950644	14996463	NC_041321.1	10	52394117	52443282	NC_006088.5	1	56378302	56436684	45.63	47.98	0.93	-0.11
akr1d1	5	15099583	15151755	NC_041321.1	10	52528186	52563676	NC_006088.5	1	56550520	56584579	32.84	35.13	0.91	-0.13
kdm7a	5	15247603	15309494	NC_041321.1	10	52641733	52689833	NC_006088.5	1	56672083	56731401	34.06	33.46	0.99	-0.01
slc37a3	5	15362404	15391908	NC_041321.1	10	52735502	52765947	NC_006088.5	1	56750045	56771553	29.18	30.24	0.94	-0.09
rab19	5	15395153	15409197	NC_041321.1	10	52765990	52774909	NC_006088.5	1	56771265	56775419	38.53	29.2	1.29	0.37
mkrn1	5	15411458	15441486	NC_041321.1	10	52777431	52800723	NC_006088.5	1	56777619	56801776	31.96	27.64	1.13	0.18
dennd2a	5	15485325	15558221					NC_006088.5	1	56832204	56889618	36.32	35.14	1.01	0.01
adck2	5	15566831	15576076	NC_041321.1	10	52869349	52877757	NC_006088.5	1	56891252	56902268	30.84	28.39	1.06	0.09
ndufb2	5	15585719	15587955	NC_041321.1	10	52887308	52897046	NC_006088.5	1	56918193	56928941	34.6	42.39	0.8	-0.33
braf	5	15582325	15652916	NC_041321.1	10	52907380	52955541	NC_006088.5	1	56919612	57002459	29.6	29.97	0.96	-0.05
mrps33	5	15664466	15671171	NC_041321.1	10	52967577	52973675	NC_006088.5	1	57013380	57019547	24.95	37.33	0.65	-0.62
tmem178b	5	15699618	16027322	NC_041321.1	10	52996692	53293350	NC_006088.5	1	57035276	57246177	31.89	25.75	1.21	0.27
agk	5	16085637	16127000	NC_041321.1	10	53329221	53369833	NC_006088.5	1	57275983	57307322	32.57	35.85	0.89	-0.17
kiaa1147	5	16132939	16167037	NC_041321.1	10	53382173	53408201	NC_006088.5	1	57310469	57339122	28.63	25.05	1.12	0.16
wee2	5	16166241	16184843	NC_041321.1	10	53408247	53427327	NC_006088.5	1	57325927	57338608	31.35	31.19	0.98	-0.03
ssbp1	5	16186878	16196474	NC_041321.1	10	53428708	53438706	NC_006088.5	1	57338774	57344343	35.42	31.17	1.11	0.15
creb3l2	5	16228324	16309051	NC_041321.1	10	53451190	53521766	NC_006088.5	1	57351716	57430650	27.38	29.11	0.92	-0.12
dgki				NC_041321.1	10	53532160	53791224	NC_006088.5	1	57435570	57652011	30.57	28.89	1.03	0.05
chrm2	NW_003338966.1	345817	541428	NC_041321.1	10	53949030	54125398	NC_006088.5	1	57798522	57897279	34.79	37.99	0.89	-0.16
fam180a	NW_003339149.1	299296	314541	NC_041321.1	10	54547632	54564151	NC_006088.5	1	58331877	58360613	26.5	31.26	0.83	-0.27
slc13a4	NW_003339149.1	323491	363635	NC_041321.1	10	54573495	54615299	NC_006088.5	1	58363484	58399367	30.33	28.02	1.06	0.08
syt10	NW_003339225.1	170789	220254	NC_041321.1	10	54805040	54845015	NC_006088.5	1	58641078	58673767	30.85	33.28	0.91	-0.14
pkp2	5	10084768	10127197	NC_041321.1	10	54950674	54997608	NC_006088.5	1	58821992	58864818	28.21	26.17	1.05	0.07
yars2	5	10145781	10151630	NC_041321.1	10	55014026	55025083	NC_006088.5	1	58904077	58909437	30.45	29.54	1.01	0.01
dnm1l	5	10151814	10190669	NC_041321.1	10	55026864	55059145	NC_006088.5	1	58913494	58950398	31.41	33.55	0.91	-0.13
fgd4	5	10244257	10296523	NC_041321.1	10	55079589	55187533	NC_006088.5	1	58960365	59072225	31.53	33.82	0.91	-0.13
bicd1	5	10383162	10516179	NC_041321.1	10	55190830	55340162	NC_006088.5	1	59082223	59268088	32.93	30.39	1.06	0.08
kiaa1551	5	10543112	10574604					NC_006088.5	1	59307833	59357780	24.89	20	1.22	0.28
amn1	5	10629192	10648890	NC_041321.1	10	55404539	55424211	NC_006088.5	1	59377216	59405582	30.51	31.81	0.94	-0.09
etfbkmt	5	10657068	10668131	NC_041321.1	10	55427952	55444949	NC_006088.5	1	59404624	59411012	35.86	32.76	1.07	0.1
dennd5b	5	10738946	10796375	NC_041321.1	10	55453812	55551639	NC_006088.5	1	59422523	59532407	33.28	32.97	0.99	-0.02
caprin2	5	10826302	10864146	NC_041321.1	10	55585354	55613935	NC_006088.5	1	59578997	59611006	32.98	33.9	0.95	-0.07
ipo8	5	10869054	10917121	NC_041321.1	10	55618627	55658864	NC_006088.5	1	59614496	59656537	33.22	31.79	1.02	0.03
tmtc1	5	10967705	11162458	NC_041321.1	10	55672828	55858565	NC_006088.5	1	59699643	59845409	32.76	34.77	0.92	-0.12
ddx11	5	11288925	11323078	NC_041321.1	10	55898318	55927930	NC_006088.5	1	59917465	59938028	31.5	31.13	0.99	-0.02
iqsec3	5	11427471	11622536	NC_041321.1	10	56022779	56170965	NC_006088.5	1	59997795	60104999	32.97	33.14	0.97	-0.04
kdm5a	5	11881515	11932481	NC_041321.1	10	56374843	56419421	NC_006088.5	1	60226174	60275165	33.28	33.2	0.98	-0.03
ccdc77	5	11936767	11951683					NC_006088.5	1	60275456	60290277	31.63	27.35	1.13	0.18
ninj2	5	12081720	12143498	NC_041321.1	10	56547325	56633591	NC_006088.5	1	60359916	60403894	35.65	31.03	1.12	0.17
wnk1	5	12207672	12335988	NC_041321.1	10	56633708	56736450	NC_006088.5	1	60432078	60531808	34.55	32.9	1.03	0.04
rad52	5	12344668	12366999	NC_041321.1	10	56737149	56754955	NC_006088.5	1	60530583	60545886	34.6	30.59	1.1	0.14
erc1	5	12367104	12592841	NC_041321.1	10	56754996	56889294	NC_006088.5	1	60545920	60839286	32.83	33.41	0.96	-0.06
wnt5b	5	12649803	12776913	NC_041321.1	10	56966407	57103572	NC_006088.5	1	60852694	60918508	36.27	34.69	1.02	0.03
fbxl14	5	12711085	12712532	NC_041321.1	10	57049525	57053785	NC_006088.5	1	60881396	60885783	28.48	22.28	1.25	0.32
adipor2	5	12787571	12821289	NC_041321.1	10	57111159	57150416	NC_006088.5	1	60925606	60968029	35.13	31.97	1.07	0.1
cacna2d4	5	12822466	13040728	NC_041321.1	10	57150838	57291888	NC_006088.5	1	60966651	61086780	32.71	30.97	1.03	0.05
lrtm2	5	12887133	12929709	NC_041321.1	10	57197507	57231370	NC_006088.5	1	60983371	61016010	31.25	37.69	0.81	-0.3
dcp1b	5	756955	770617	NC_041321.1	10	57330367	57366622	NC_006088.5	1	61103333	61144864	32.65	30.27	1.05	0.08
cacna1c	5	13084981	13706633					NC_006088.5	1	61132602	61604932	35.86	33.12	1.06	0.08
il17ra	5	13740923	13765081	NC_041321.1	10	57888439	57909329	NC_006088.5	1	61606963	61629841	34.87	28.81	1.18	0.24
cecr6								NC_006088.5	1	61630949	61635487	12.84	14.26	0.88	-0.19
cecr5	5	13782167	13797614					NC_006088.5	1	61641192	61650820	32.38	28.67	1.1	0.14
cecr1	5	13813111	13845829					NC_006088.5	1	61653446	61672321	31	28.14	1.08	0.11
cecr2								NC_006088.5	1	61683108	61775144	33.68	31.56	1.04	0.06
atp6v1e1	5	14009131	14021450	NC_041321.1	10	58133049	58144987	NC_006088.5	1	61782702	61797925	34.89	30.74	1.11	0.15
bcl2l13	5	14021441	14057384	NC_041321.1	10	58148321	58177605	NC_006088.5	1	61798542	61841448	30.89	34.35	0.88	-0.19
bid	5	14062911	14081470	NC_041321.1	10	58183228	58199574	NC_006088.5	1	61841784	61860381	59.77	40.37	1.45	0.53
pex26	5	14316390	14327179	NC_041321.1	10	58426645	58431712	NC_006088.5	1	62042533	62048263	30.38	30.64	0.97	-0.05
usp18	5	14357624	14375661	NC_041321.1	10	58465312	58477044	NC_006088.5	1	62069631	62083650	27.37	35.56	0.75	-0.41
bpgm	5	14469688	14489072	NC_041321.1	10	58634023	58649805	NC_006088.5	1	62166914	62186554	28.1	32.16	0.85	-0.23
cald1	5	14534506	14706860	NC_041321.1	10	58717251	58898271	NC_006088.5	1	62269277	62457112	32.08	32.41	0.97	-0.05
rerg	5	14781776	14877307	NC_041321.1	10	58986612	59070010	NC_006088.5	1	62628181	62735291	31.33	34.78	0.88	-0.18
ptpro	NW_003338883.1	1050933	1183001	NC_041321.1	10	59089033	59229391	NC_006088.5	1	62781686	62930932	31.53	32.09	0.96	-0.06
eps8	NW_003338883.1	892015	1048497	NC_041321.1	10	59232247	59374826	NC_006088.5	1	62933952	63065195	30.61	32.43	0.92	-0.12
strap	NW_003338883.1	851979	866905	NC_041321.1	10	59411579	59421698	NC_006088.5	1	63098568	63107700	33.03	32.78	0.98	-0.02
dera	NW_003338883.1	806723	848852	NC_041321.1	10	59424910	59470861	NC_006088.5	1	63109353	63163157	29.34	31.73	0.9	-0.15
slc15a5	NW_003338883.1	695770	756222	NC_041321.1	10	59524624	59572644	NC_006088.5	1	63214795	63243782	29.16	27.24	1.05	0.06
lmo3	NW_003338883.1	494532	585231	NC_041321.1	10	59679905	59775939	NC_006088.5	1	63348908	63411010	47.25	37.46	1.23	0.3
rergl	5	9911647	9920344	NC_041321.1	10	60227847	60238626	NC_006088.5	1	63888788	63899627	30.27	32.28	0.92	-0.13
plcz1								NC_006088.5	1	64181927	64224901	33.76	33.47	0.99	-0.02
plekha5	5	9017692	9221002	NC_041321.1	10	60857288	61061403	NC_006088.5	1	64349668	64520561	32.39	30.24	1.05	0.07
aebp2	5	8968286	8988491	NC_041321.1	10	61078714	61111738	NC_006088.5	1	64536108	64585964	33.55	34.23	0.96	-0.06
pde3a	5	8489674	8762025	NC_041321.1	10	61318771	61589319	NC_006088.5	1	64883003	65126745	31.73	33.83	0.92	-0.13
slco1c1								NC_006088.5	1	65137008	65158246	34.57	33.08	1.02	0.03
pyroxd1	5	8256889	8273173	NC_041321.1	10	61836563	61853038	NC_006088.5	1	65298275	65313390	31.57	28.2	1.09	0.13
recql	5	8251377	8257294	NC_041321.1	10	61854174	61872116	NC_006088.5	1	65306866	65337113	30.17	33.25	0.89	-0.17
golt1b	5	8215898	8225717	NC_041321.1	10	61872373	61888030	NC_006088.5	1	65337341	65349863	35.75	32.13	1.09	0.12
sox5	5	7178274	7602240	NC_041321.1	10	62045309	62809806	NC_006088.5	1	65531053	66179027	33.24	29.73	1.09	0.13
etnk1	5	6864620	6899985	NC_041321.1	10	63058461	63094108	NC_006088.5	1	66447473	66480764	34.55	35.98	0.94	-0.09
c2cd5	5	6770573	6846144	NC_041321.1	10	63110712	63202017	NC_006088.5	1	66497050	66570765	29.99	31.91	0.92	-0.12
st8sia1	5	6630003	6770236	NC_041321.1	10	63213121	63303185	NC_006088.5	1	66588236	66704165	40.86	27.25	1.46	0.55
cmas	5	6549853	6564557	NC_041321.1	10	63366184	63385892	NC_006088.5	1	66843089	66853791	28.15	36.76	0.75	-0.42
kcnj8	5	6456212	6462602	NC_041321.1	10	63490196	63496948	NC_006088.5	1	66955394	66963463	38.01	30.05	1.24	0.31
lrmp								NC_006088.5	1	67126380	67162844	32.96	27.5	1.17	0.23
casc1	5	6200957	6226040	NC_041321.1	10	63733862	63782135	NC_006088.5	1	67162845	67179192	34.84	33.02	1.03	0.04
kras	NW_003339711.1	47222	86348	NC_041321.1	10	63799037	63848850	NC_006088.5	1	67185059	67210084	31.68	24.71	1.25	0.32
rassf8	NW_003338896.1	1012413	1123315	NC_041321.1	10	575083	691293	NC_006088.5	1	67493888	67574359	28.55	30.5	0.91	-0.13
bhlhe41	NW_003338896.1	1157259	1165714	NC_041321.1	10	555435	561188	NC_006088.5	1	67586363	67590684	14.83	22.43	0.65	-0.63
sspn	5	90723882	90736603	NC_041321.1	10	118355	127014	NC_006088.5	1	67612074	67632419	28.02	25.2	1.09	0.12
itpr2	5	90762277	91032615	NC_041321.1	10	174151	408303	NC_006088.5	1	67656124	67921681	31.7	33.04	0.94	-0.09
fgfr1op2	5	91085619	91101305	NC_041321.1	10	3091951	3104336	NC_006088.5	1	67983452	67994763	31.36	35.16	0.87	-0.2
tm7sf3	5	91103419	91139524	NC_041321.1	10	3104643	3133071	NC_006088.5	1	67998130	68016687	32.16	29.91	1.05	0.07
med21	5	91143350	91150761	NC_041321.1	10	3134874	3140499	NC_006088.5	1	68016635	68023808	29.01	35.95	0.79	-0.34
stk38l	5	91261961	91316967	NC_041321.1	10	3151448	3198211	NC_006088.5	1	68074879	68121699	34.64	34.35	0.99	-0.02
ppfibp1	5	91391195	91540930	NC_041321.1	10	3319286	3387887	NC_006088.5	1	68191541	68291096	32.6	30.63	1.04	0.06
a4galt	5	87012679	87014079	NC_041316.1	5	4544769	4619635	NC_006088.5	1	68335219	68348032	25.86	33.74	0.75	-0.42
arfgap3	5	86931802	86978508	NC_041316.1	5	4484346	4519121	NC_006088.5	1	68365224	68398974	29.74	28.67	1.01	0.02
pacsin2	5	86908719	86927341	NC_041316.1	5	4429618	4480515	NC_006088.5	1	68405051	68468435	27.82	29.2	0.93	-0.1
ttll1	5	86822390	86857441	NC_041316.1	5	4401877	4422310	NC_006088.5	1	68470588	68498563	32.67	31.19	1.02	0.03
mcat	5	86777424	86785814	NC_041316.1	5	4361782	4369121	NC_006088.5	1	68515713	68520474	34.06	24.23	1.37	0.46
ttll12	5	86722341	86754186	NC_041316.1	5	4330384	4350550	NC_006088.5	1	68532349	68552525	33.02	31.68	1.02	0.03
mpped1	5	86242033	86368673	NC_041316.1	5	3985369	4076182	NC_006088.5	1	68818077	68881195	28.43	29.75	0.93	-0.1
efcab6	5	86007938	86214626	NC_041316.1	5	3850186	3960689	NC_006088.5	1	68893973	68912601	32.02	32.19	0.97	-0.04
sult4a1	5	85959220	85987457	NC_041316.1	5	3801921	3836184	NC_006088.5	1	69011400	69044884	44.81	44.7	0.98	-0.03
samm50	5	85853820	85880132	NC_041316.1	5	3736315	3755794	NC_006088.5	1	69091104	69109302	29.86	34.4	0.85	-0.24
kiaa1644	5	85317384	85648671					NC_006088.5	1	69272798	69355042	29.19	28.62	1	-0.01
prr5				NC_041316.1	5	3154669	3227640	NC_006088.5	1	69701159	69786722	28.54	30.26	0.92	-0.12
phf21b	5	84864903	84924683	NC_041316.1	5	2882763	3073330	NC_006088.5	1	69916224	70078338	33.14	31.72	1.02	0.03
nup50	5	84522684	84548141	NC_041316.1	5	2705610	2724177	NC_006088.5	1	70202950	70218997	33.3	33.22	0.98	-0.03
kiaa0930	5	84459333	84514417	NC_041316.1	5	2640492	2696401	NC_006088.5	1	70222656	70290698	28.05	33.81	0.81	-0.3
smc1b	5	84257726	84315630	NC_041316.1	5	2525276	2562435	NC_006088.5	1	70357832	70399034	32.57	31.2	1.02	0.03
ribc2	5	84246797	84257598	NC_041316.1	5	2510264	2525189	NC_006088.5	1	70398591	70412842	29.32	33.85	0.85	-0.24
fbln1	5	84102369	84209644	NC_041316.1	5	2438930	2494238	NC_006088.5	1	70452502	70534920	35.94	28.96	1.21	0.28
atxn10	5	83759431	83822571	NC_041316.1	5	2352050	2422931	NC_006088.5	1	70567544	70663659	30.25	33.29	0.89	-0.17
wnt7b	5	83932746	84072128	NC_041316.1	5	2267496	2278382	NC_006088.5	1	70751533	70843213	30.03	33.38	0.88	-0.19
ppara	5	83451413	83487186	NC_041316.1	5	1910977	1918743	NC_006088.5	1	71237314	71277816	33.96	35.24	0.94	-0.09
cdpf1	5	83430938	83460878	NC_041316.1	5	1888205	1896919	NC_006088.5	1	71279698	71299679	21.55	30.19	0.7	-0.52
pkdrej								NC_006088.5	1	71300574	71308828	15.83	28.86	0.54	-0.9
ttc38	5	83401607	83429815	NC_041316.1	5	1820313	1847480	NC_006088.5	1	71340632	71360016	16.59	33.65	0.48	-1.05
etv6	5	83149296	83302821	NC_041316.1	5	1601554	1749519	NC_006088.5	1	71449075	71582048	34.08	33.6	0.99	-0.01
bcl2l14				NC_041316.1	5	1572221	1585108	NC_006088.5	1	71628812	71641296	12.34	27.5	0.44	-1.19
lrp6	5	83060541	83142827	NC_041316.1	5	1451519	1557767	NC_006088.5	1	71652621	71788148	32.69	29.87	1.07	0.1
borcs5	5	83015978	83031425	NC_041316.1	5	1355577	1410495	NC_006088.5	1	71806720	71868151	13.91	30.13	0.45	-1.15
dusp16	5	82959004	83009156	NC_041316.1	5	1295296	1352848	NC_006088.5	1	71869905	71940798	14.77	27.89	0.52	-0.95
crebl2	NW_003339126.1	452674	461635	NC_041316.1	5	1274772	1280562	NC_006088.5	1	71960864	71970744	15.79	28.3	0.55	-0.88
gpr19	NW_003339126.1	441718	443883	NC_041316.1	5	1270863	1273504	NC_006088.5	1	71970914	71989049	17.26	27.74	0.61	-0.72
cdkn1b	NW_003339126.1	384952	392678	NC_041316.1	5	1183212	1188499	NC_006088.5	1	72096483	72105404	22.54	36.35	0.61	-0.72
mrps35	5	82933929	82939675	NC_041316.1	5	680695	710015	NC_006088.5	1	72622760	72644857	17.24	32.14	0.52	-0.93
mansc4	5	82925921	82932102	NC_041316.1	5	662049	676990	NC_006088.5	1	72648944	72664039	18.34	33.27	0.54	-0.89
klhl42	5	82891435	82903259					NC_006088.5	1	72671547	72684433	15.95	22.68	0.69	-0.54
pthlh	5	82748867	82764670	NC_041316.1	5	491586	506388	NC_006088.5	1	72752027	72765114	27.89	25.97	1.05	0.07
ccdc91	5	82528630	82611570	NC_041316.1	5	270456	401992	NC_006088.5	1	72867659	73076704	15.47	23.26	0.65	-0.62
rad51ap1				NC_041316.1	5	7722030	7737792	NC_006088.5	1	73320437	73358099	16.38	32.44	0.49	-1.02
fgf6	5	80995632	81006152	NC_041316.1	5	7774697	7788559	NC_006088.5	1	73397575	73408391	13.46	27.81	0.47	-1.08
fgf23	5	81042689	81053600	NC_041316.1	5	7801536	7808523	NC_006088.5	1	73425055	73429052	17.07	26.93	0.62	-0.69
tigar	5	81056916	81072662	NC_041316.1	5	7814061	7827108	NC_006088.5	1	73443326	73466924	17.81	30.71	0.57	-0.82
ccnd2								NC_006088.5	1	73472300	73515288	14.1	28.36	0.49	-1.04
ndufa9	5	80850304	80879482	NC_041316.1	5	7564997	7587177	NC_006088.5	1	73689606	73709244	23.96	47.04	0.5	-1.01
ntf3	5	81502693	81567585	NC_041316.1	5	7154466	7217707	NC_006088.5	1	74215247	74285493	26.77	29.21	0.9	-0.16
vwf	5	81821311	82024856	NC_041316.1	5	6724921	6931030	NC_006088.5	1	74544347	74683073	18.24	31.96	0.56	-0.84
cd9	5	82044380	82062130					NC_006088.5	1	74715961	74739606	16.15	31.61	0.5	-1
tspan9	5	81168047	81344503	NC_041320.1	9	5263882	5395308	NC_006088.5	1	75058415	75199528	31.33	32.67	0.94	-0.09
tulp3	5	80676768	80704566	NC_041320.1	9	5397022	5420522	NC_006088.5	1	75291772	75327340	32.12	32.17	0.98	-0.04
foxm1	5	80644582	80672560	NC_041320.1	9	5437162	5460954	NC_006088.5	1	75327522	75363582	31.99	24.7	1.27	0.34
itfg2	5	80606604	80626654	NC_041320.1	9	5472163	5485489	NC_006088.5	1	75376950	75394748	32.64	31.8	1	0
fkbp4	5	80561597	80599765	NC_041320.1	9	5486587	5506719	NC_006088.5	1	75399374	75413494	34.37	30.9	1.09	0.12
necap1	NW_003338783.1	1161281	1186522	NC_041320.1	9	2489509	2507435	NC_006088.5	1	75447601	75455201	33.94	31.94	1.04	0.05
aicda	2	81517926	81533176	NC_041328.1	17	31263360	31266803	NC_006088.5	1	75633850	75637829	36.8	35.53	1.01	0.02
mfap5	2	81435966	81460852	NC_041328.1	17	31279475	31317718	NC_006088.5	1	75647635	75669272	34.49	28.43	1.19	0.24
rimklb	2	81327228	81370785	NC_041328.1	17	31333427	31380094	NC_006088.5	1	75669893	75740264	32.43	29.6	1.07	0.1
phc1	2	81549188	81591459	NC_041328.1	17	31230514	31259619	NC_006088.5	1	75865514	75884655	30	30.6	0.96	-0.06
m6pr	2	81593384	81603552	NC_041328.1	17	31217901	31228929	NC_006088.5	1	75884880	75891473	32.82	32.43	0.99	-0.02
man1a2	NW_003338765.1	330690	369412	NC_041328.1	17	2885771	2926585	NC_006088.5	1	77143358	77281948	29.7	30.42	0.95	-0.07
casr	NW_003338765.1	264063	329020	NC_041328.1	17	2940272	2993619	NC_006088.5	1	77353339	77430788	35.16	30.58	1.12	0.17
ccdc58	NW_003339020.1	116320	138860	NC_041328.1	17	1071770	1080586	NC_006088.5	1	77454326	77463617	26.33	36.27	0.71	-0.5
fam162a	NW_003339020.1	99780	113551	NC_041328.1	17	1085062	1095660	NC_006088.5	1	77463138	77472450	27.77	35.08	0.77	-0.37
kpna1	NW_003339020.1	32857	94794	NC_041328.1	17	1099937	1129005	NC_006088.5	1	77475063	77526314	30.35	30.03	0.99	-0.02
fbxo40	NW_003339020.1	5067	21723					NC_006088.5	1	77526475	77532954	27.8	31.58	0.86	-0.22
scnn1a	NW_003338928.1	503154	540563	NC_041328.1	17	4150446	4184028	NC_006088.5	1	77568659	77576825	28.94	27.4	1.03	0.05
mrpl51	NW_003338928.1	564531	567328					NC_006088.5	1	77585838	77587391	33.18	34.65	0.94	-0.1
ncapd2	NW_003338928.1	569388	614224	NC_041328.1	17	4115867	4144526	NC_006088.5	1	77587492	77611310	33.62	30.92	1.06	0.09
gapdh	NW_003338928.1	639730	654374	NC_041328.1	17	4096946	4104558	NC_006088.5	1	77619440	77623355	32.79	27.58	1.16	0.22
iffo1	NW_003338928.1	664877	700902	NC_041328.1	17	4060030	4085061	NC_006088.5	1	77626220	77643627	41.1	35.42	1.13	0.18
nop2	NW_003338928.1	711270	731838	NC_041328.1	17	4034317	4056891	NC_006088.5	1	77649723	77656335	29.62	27.64	1.05	0.07
chd4	NW_003338928.1	734768	784773	NC_041328.1	17	4002837	4030061	NC_006088.5	1	77655420	77676696	32.74	32.87	0.97	-0.04
lpar5	NW_003338928.1	799566	820273	NC_041328.1	17	3956800	3976784	NC_006088.5	1	77694431	77706116	30.07	30.95	0.95	-0.08
ing4	NW_003338928.1	851662	859574	NC_041328.1	17	3906830	3916558	NC_006088.5	1	77735015	77749824	30.47	34.54	0.86	-0.21
pianp	NW_003338928.1	991595	1038292	NC_041328.1	17	3782910	3816732	NC_006088.5	1	77799606	77817252	35.15	28.47	1.21	0.27
cops7a	NW_003339000.1	47631	52855	NC_041328.1	17	3741314	3752982	NC_006088.5	1	77817352	77820482	30.45	34.35	0.87	-0.21
mlf2	NW_003339000.1	105694	119832	NC_041328.1	17	3705606	3718835	NC_006088.5	1	77831588	77838988	29.83	28.79	1.01	0.02
ptms	NW_003339000.1	162491	167444	NC_041328.1	17	3641645	3652910	NC_006088.5	1	77844918	77848410	32.11	39.97	0.78	-0.35
lag3	NW_003339000.1	199063	211780	NC_041328.1	17	3618043	3627154	NC_006088.5	1	77861527	77868721	31.05	24.51	1.24	0.31
gpr162	NW_003339000.1	297554	318641	NC_041328.1	17	3524489	3547618	NC_006088.5	1	77893003	77899117	23.94	28.31	0.83	-0.28
p3h3	NW_003339000.1	326197	360010	NC_041328.1	17	3491588	3516193	NC_006088.5	1	77899809	77922111	28.99	28.79	0.98	-0.02
cdca3	NW_003339000.1	407202	422404	NC_041328.1	17	3426365	3433268	NC_006088.5	1	77922769	77924912	41.48	27.07	1.5	0.58
usp5	NW_003339000.1	422637	449354	NC_041328.1	17	3396893	3425957	NC_006088.5	1	77925265	77940459	33.24	29.36	1.11	0.15
tpi1	NW_003339000.1	452447	466613	NC_041328.1	17	3379536	3391544	NC_006088.5	1	77940690	77943689	28.62	27.52	1.02	0.02
lrrc23	NW_003339000.1	475616	498838	NC_041328.1	17	3363555	3373403	NC_006088.5	1	77944957	77953331	29.21	35.14	0.81	-0.3
eno2	NW_003339000.1	499028	521188	NC_041328.1	17	3336249	3363322	NC_006088.5	1	77953530	77962833	30.98	28.02	1.08	0.11
atn1	NW_003339000.1	561226	595499	NC_041328.1	17	3270045	3303174	NC_006088.5	1	77968332	77991620	29.08	28.14	1.01	0.01
ptpn6				NC_041328.1	17	3208528	3248746	NC_006088.5	1	77994350	78014701	30.17	33.96	0.87	-0.2
phb2	NW_003339000.1	666658	675326	NC_041328.1	17	3195955	3205181	NC_006088.5	1	78014804	78020503	32.16	25.53	1.23	0.3
emg1				NC_041328.1	17	3191778	3195788	NC_006088.5	1	78020619	78022849	27.88	31.04	0.88	-0.19
lpcat3	NW_003338765.1	44038	66064	NC_041328.1	17	3170732	3191138	NC_006088.5	1	78023020	78038723	32.6	31.38	1.01	0.02
c1r	NW_003338765.1	93664	117152	NC_041328.1	17	3106830	3124837	NC_006088.5	1	78058001	78065406	32.93	29.41	1.09	0.13
rbp5	NW_003338765.1	125320	142137	NC_041328.1	17	3086132	3096568	NC_006088.5	1	78070071	78071702	34.65	27.84	1.22	0.28
clstn3	NW_003338765.1	154314	201046	NC_041328.1	17	3039720	3075816	NC_006088.5	1	78071708	78087299	30.99	33.9	0.89	-0.16
pex5	NW_003338765.1	233070	256658	NC_041328.1	17	2998458	3019011	NC_006088.5	1	78099886	78110916	31.39	32.54	0.94	-0.09
epha1	NW_003338938.1	490737	631524	NC_041328.1	17	9903869	9978325	NC_006088.5	1	78162527	78195974	31.95	32.26	0.97	-0.05
zyx	NW_003338938.1	635298	673013	NC_041328.1	17	9983430	10014605	NC_006088.5	1	78201043	78231480	30.19	30.63	0.96	-0.05
fam131b	NW_003338938.1	698420	775982	NC_041328.1	17	10035605	10086120	NC_006088.5	1	78212568	78261294	32.91	29.49	1.09	0.12
clcn1	NW_003338938.1	799616	874002	NC_041328.1	17	10098510	10245796	NC_006088.5	1	78261760	78334112	32.88	31.54	1.02	0.03
casp2	NW_003338938.1	928045	958601	NC_041328.1	17	10246242	10266585	NC_006088.5	1	78336971	78363000	28.85	32.09	0.88	-0.19
tmem139	NW_003338928.1	12410	29165	NC_041328.1	17	10289694	10299690	NC_006088.5	1	78364710	78369487	31.88	33.35	0.93	-0.1
gstk1	NW_003338928.1	164182	178122					NC_006088.5	1	78425551	78436579	38.95	32.79	1.16	0.21
styk1								NC_006088.5	1	79108090	79132572	34.04	28.92	1.15	0.2
gabarapl1	2	81870835	81894968					NC_006088.5	1	79147776	79157668	31.65	26.29	1.18	0.23
tmem52b	2	81811798	81848946	NC_041328.1	17	30959284	30972396	NC_006088.5	1	79164462	79169338	33.83	35.18	0.94	-0.09
hao2	NW_003338765.1	428102	444232	NC_041328.1	17	2828193	2849320	NC_006088.5	1	79327600	79341242	36.65	31.88	1.12	0.17
tbx15	NW_003338765.1	598015	671542					NC_006088.5	1	79496526	79586758	32.09	31.18	1.01	0.01
spag17	NW_003338765.1	768259	890042	NC_041328.1	17	2302836	2377958	NC_006088.5	1	79791818	79885285	30.78	31.45	0.96	-0.06
wdr3	NW_003338765.1	878787	912087	NC_041328.1	17	2271899	2302057	NC_006088.5	1	79885165	79906621	31.43	31.57	0.97	-0.04
gdap2	NW_003338765.1	912167	933938	NC_041328.1	17	2250385	2271386	NC_006088.5	1	79906635	79928456	29.94	32.98	0.89	-0.17
fam46c								NC_006088.5	1	79952693	79957248	30.03	31.82	0.92	-0.12
dusp12	NW_003338765.1	938722	947173	NC_041328.1	17	2206844	2221687	NC_006088.5	1	79964646	79968560	30.74	29.67	1.01	0.02
atp6v1a	NW_003339020.1	405355	454454	NC_041328.1	17	880592	905101	NC_006088.5	1	79969015	79997370	34.63	36.49	0.93	-0.11
naa50	NW_003339020.1	379510	398876	NC_041328.1	17	907055	924299	NC_006088.5	1	79997432	80018156	33.7	32.01	1.03	0.04
usf3	NW_003339020.1	330454	371958	NC_041328.1	17	928875	952477	NC_006088.5	1	80019464	80043397	29.24	27.06	1.06	0.08
sidt1	NW_003339020.1	206593	309707	NC_041328.1	17	955032	998855	NC_006088.5	1	80052656	80093243	34.77	28.7	1.18	0.24
spice1	NW_003339020.1	154254	193378	NC_041328.1	17	1005795	1025199	NC_006088.5	1	80098288	80131901	32.27	32.26	0.98	-0.03
mettl16	6	66088965	66114977	NC_041324.1	13	15794946	15808676	NC_006088.5	1	80198340	80209250	29.45	29.18	0.99	-0.02
polq	NW_003338873.1	72657	131561	NC_041328.1	17	770552	814728	NC_006088.5	1	80209333	80266153	34.23	31.4	1.06	0.09
stxbp5l	NW_003338873.1	7548	71906	NC_041328.1	17	700332	768397	NC_006088.5	1	80273743	80460540	32.3	29.64	1.06	0.09
gtf2e1	NW_003339020.1	682690	693438	NC_041328.1	17	679956	690281	NC_006088.5	1	80503126	80553744	34.9	28.91	1.18	0.24
rabl3	NW_003339020.1	659949	677462	NC_041328.1	17	669544	679778	NC_006088.5	1	80556293	80569250	33.15	29.28	1.11	0.15
hgd	NW_003339020.1	635193	657296	NC_041328.1	17	645031	667107	NC_006088.5	1	80581527	80599821	31.95	31.85	0.98	-0.03
fstl1	NW_003338873.1	140305	189946	NC_041328.1	17	584550	606210	NC_006088.5	1	80650682	80694243	31.22	28.43	1.07	0.1
gsk3b	NW_003338961.1	297271	424867	NC_041328.1	17	468625	528091	NC_006088.5	1	80749608	80891086	33.32	33.36	0.98	-0.04
maats1	NW_003338961.1	211692	290474	NC_041328.1	17	439786	465387	NC_006088.5	1	80895270	80927971	31.92	32.25	0.97	-0.05
popdc2	NW_003338961.1	170550	201449	NC_041328.1	17	405806	429147	NC_006088.5	1	80940645	80954049	22.64	33.47	0.66	-0.6
pla1a	NW_003338961.1	133366	167141	NC_041328.1	17	380538	402706	NC_006088.5	1	80955478	80972890	27.81	30.86	0.88	-0.18
atp1a1				NC_041328.1	17	312430	342987	NC_006088.5	1	81030193	81054213	40.5	36.15	1.09	0.13
mab21l3	2	83128136	83157167	NC_041328.1	17	236710	252509	NC_006088.5	1	81097708	81119666	33.42	32.84	0.99	-0.01
slc22a15	2	83059784	83085865	NC_041328.1	17	206030	231891	NC_006088.5	1	81117021	81161175	29.74	28	1.04	0.05
casq2								NC_006088.5	1	81232635	81263367	34.18	33.48	1	0
vangl1	2	82761515	82823392	NC_041328.1	17	51772	106535	NC_006088.5	1	81270996	81312361	25.55	28.07	0.89	-0.17
tmem39a	2	82577428	82615513	NC_041328.1	17	30480560	30509413	NC_006088.5	1	81358224	81366818	33.07	31.89	1.01	0.02
b4galt4	3	181297031	181334613	NC_041315.1	4	30429195	30448382	NC_006088.5	1	81383059	81407644	32.91	30.48	1.05	0.08
b4galt3	NW_003339328.1	79427	99272	NC_041327.1	16	11565247	11576947	NC_006088.5	1	81408654	81422638	29.8	23.15	1.26	0.33
upk1b	3	180856854	180899934	NC_041315.1	4	30755206	30778930	NC_006088.5	1	81562061	81573690	32.19	35.33	0.89	-0.17
igsf11	3	180485722	180750976	NC_041315.1	4	30863505	31041477	NC_006088.5	1	81625126	81713000	32.01	27.39	1.14	0.19
gap43	3	177523429	177605750	NC_041315.1	4	32957226	33013482	NC_006088.5	1	83026666	83079911	36.5	26.67	1.34	0.42
zbtb20	3	176639540	176748918	NC_041315.1	4	33148683	33622188	NC_006088.5	1	83246152	83723406	29.76	32.81	0.89	-0.17
drd3	3	176551535	176592197	NC_041315.1	4	33662150	33682842	NC_006088.5	1	83742971	83756067	33.15	31.65	1.02	0.03
ccdc191	3	176495311	176517383	NC_041315.1	4	33718740	33741280	NC_006088.5	1	83782672	83806703	31.58	33.99	0.91	-0.14
zdhhc23	3	176478346	176491999	NC_041315.1	4	33741326	33751394	NC_006088.5	1	83783706	83813811	30.13	30.62	0.96	-0.06
gramd1c	3	176384132	176467258	NC_041315.1	4	33755452	33833798	NC_006088.5	1	83813960	83877478	35.41	30.78	1.12	0.17
g6pd	2	89700419	89736384	NC_041328.1	17	41006905	41030195	NC_006088.5	1	84097496	84102135	34.54	32.69	1.03	0.05
cldnd1	3	176324451	176329608					NC_006088.5	1	84300600	84309886	28.52	26.58	1.05	0.07
gpr15	3	176313893	176316145	NC_041315.1	4	33881782	33883192	NC_006088.5	1	84316430	84318333	35.75	31.05	1.12	0.17
ildr1	3	176277915	176290844	NC_041315.1	4	33901031	33916194	NC_006088.5	1	84335063	84352827	33.22	32.55	1	0
cfap44	3	176185007	176273385	NC_041315.1	4	33917095	33976593	NC_006088.5	1	84352916	84398904	36.84	31.59	1.14	0.19
boc	3	176111854	176184730	NC_041315.1	4	33976937	34049462	NC_006088.5	1	84397709	84443638	30.67	31.84	0.94	-0.09
taf13	3	175965473	175970498	NC_041315.1	4	34139180	34149524	NC_006088.5	1	84524501	84526816	36.19	22.5	1.57	0.65
gtpbp8	3	175942905	175962638	NC_041315.1	4	34151530	34161157	NC_006088.5	1	84527724	84532402	34.63	33.42	1.01	0.02
cd200r1	3	175924754	175944929	NC_041315.1	4	34166965	34184364	NC_006088.5	1	84563219	84585091	29.8	32.65	0.89	-0.17
ccdc80	3	175805293	175833338	NC_041315.1	4	34248201	34269560	NC_006088.5	1	84661658	84685247	30.87	30.16	1	0
slc35a5	3	175786627	175798993	NC_041315.1	4	34272889	34285561	NC_006088.5	1	84686168	84701091	33.09	32.39	1	0
atg3	3	175766423	175786213	NC_041315.1	4	34286070	34306688	NC_006088.5	1	84701318	84724935	32.57	35.76	0.89	-0.17
f5	3	175704017	175744262	NC_041315.1	4	34310431	34351214	NC_006088.5	1	84730524	84767885	34.28	33.36	1	0.01
slc19a2	3	175681587	175699617	NC_041315.1	4	34356300	34388301	NC_006088.5	1	84778616	84791233	37.43	28.69	1.27	0.35
ccdc181	3	175662224	175678621	NC_041315.1	4	34390173	34399454	NC_006088.5	1	84789000	84803685	33.28	31.73	1.02	0.04
blzf1	3	175649280	175661447	NC_041315.1	4	34400009	34410284	NC_006088.5	1	84803470	84810182	28.85	31.65	0.89	-0.17
nme7	3	175532137	175648537	NC_041315.1	4	34411019	34480603	NC_006088.5	1	84810191	84899921	30.48	35.72	0.83	-0.26
atp1b1	3	175501208	175532323	NC_041315.1	4	34480415	34513265	NC_006088.5	1	84899778	84913478	31.5	31.76	0.97	-0.05
dpt	3	175336732	175355102	NC_041315.1	4	34619798	34637459	NC_006088.5	1	85034495	85064056	28.8	31.31	0.9	-0.15
tbx19	3	175139807	175159750	NC_041315.1	4	34749627	34764880	NC_006088.5	1	85209234	85223485	29.42	30.42	0.94	-0.08
sft2d2	3	175104637	175127996	NC_041315.1	4	34769505	34783955	NC_006088.5	1	85229374	85239197	33	30.65	1.05	0.07
tiprl	3	175089082	175098255	NC_041315.1	4	34785371	34793482	NC_006088.5	1	85239455	85248961	34.35	32.02	1.05	0.07
gpr161	3	175060882	175069593	NC_041315.1	4	34795017	34809983	NC_006088.5	1	85248995	85261304	40.82	31.94	1.25	0.32
ttf2	3	175030180	175056301	NC_041315.1	4	34811904	34835020	NC_006088.5	1	85259720	85281507	30.51	30.35	0.98	-0.03
cpox	3	175006082	175015580	NC_041315.1	4	34841695	34853659	NC_006088.5	1	85287224	85295791	31.5	30.73	1	0
st3gal6	3	174915100	174961990	NC_041315.1	4	34875634	34924502	NC_006088.5	1	85326697	85378993	38.25	35.06	1.07	0.09
col8a1	3	174771306	174893523	NC_041315.1	4	34925254	35024751	NC_006088.5	1	85381328	85470456	35.98	34.14	1.03	0.04
dcbld2	3	174562588	174606456	NC_041315.1	4	35129576	35162573	NC_006088.5	1	85657204	85699919	32.23	33.88	0.93	-0.11
cmss1	3	174266796	174546887	NC_041315.1	4	35181884	35366561	NC_006088.5	1	85719687	85783023	31.95	31.88	0.98	-0.03
filip1l	3	174271920	174516548	NC_041315.1	4	35202355	35361834	NC_006088.5	1	85747773	85944599	35.16	29.21	1.18	0.23
tbc1d23	3	174224569	174263227	NC_041315.1	4	35367411	35399404	NC_006088.5	1	85945795	85977169	32.69	35.57	0.9	-0.16
nit2	3	174203755	174221523	NC_041315.1	4	35401356	35413727	NC_006088.5	1	85975710	85989195	29.7	28.42	1.02	0.03
lnp1	3	174147706	174161258	NC_041315.1	4	35440768	35449416	NC_006088.5	1	86009787	86023742	32.95	31.07	1.04	0.05
tmem45a	3	174113122	174129977	NC_041315.1	4	35458456	35478909	NC_006088.5	1	86036845	86057751	35.03	39.15	0.87	-0.19
adgrg7								NC_006088.5	1	86061697	86086124	30.74	30.24	0.99	-0.01
tfg	3	174077876	174100219	NC_041315.1	4	35536137	35554951	NC_006088.5	1	86088881	86107421	35.92	34.85	1.01	0.01
abi3bp	3	173903182	174074865	NC_041315.1	4	35556964	35661667	NC_006088.5	1	86110406	86243541	32.37	32.14	0.98	-0.02
impg2	3	173699585	173780672	NC_041315.1	4	35781251	35837167	NC_006088.5	1	86330989	86385006	35.56	31.51	1.1	0.14
senp7	3	173647764	173691926	NC_041315.1	4	35839657	35885173	NC_006088.5	1	86385135	86425479	32.27	32.92	0.96	-0.06
txnl4b	NW_003341384.1	8502	9498	NC_041315.1	4	35889371	35893291	NC_006088.5	1	86430528	86436587	25.01	29.29	0.83	-0.26
trmt10c	3	173622586	173627154	NC_041315.1	4	35893421	35898150	NC_006088.5	1	86432566	86435576	32.36	25.48	1.24	0.31
pcnp	3	173608657	173617821	NC_041315.1	4	35900009	35908410	NC_006088.5	1	86433447	86447140	32.87	32.95	0.97	-0.04
rpl24	3	173578956	173584954	NC_041315.1	4	35933353	35939415	NC_006088.5	1	86469530	86473667	44.28	34.3	1.26	0.33
cep97	3	173550890	173578923	NC_041315.1	4	35939422	35950941	NC_006088.5	1	86473735	86490892	31.89	32	0.97	-0.04
nxpe3	3	173518903	173546940	NC_041315.1	4	35955155	35970124	NC_006088.5	1	86495531	86514755	30.59	33.66	0.89	-0.17
nfkbiz	3	173467821	173478410	NC_041315.1	4	35991052	36026381	NC_006088.5	1	86512299	86537925	32.57	31.63	1.01	0.01
zpld1	3	173220179	173305551	NC_041315.1	4	36169901	36200984	NC_006088.5	1	86589047	86712834	31.51	32.34	0.95	-0.07
alcam	3	170816859	171026470	NC_041315.1	4	37458407	37577205	NC_006088.5	1	87615066	87731031	33.79	34.76	0.95	-0.07
cblb	3	170645769	170774571	NC_041315.1	4	37596554	37657812	NC_006088.5	1	87755406	87881292	33.42	32.07	1.02	0.03
bbx	3	169764003	169922097	NC_041315.1	4	38091577	38209395	NC_006088.5	1	88323582	88464943	32.65	33.58	0.95	-0.07
cd47	3	169556022	169637831	NC_041315.1	4	38292759	38340021	NC_006088.5	1	88694157	88714915	36.55	37.73	0.95	-0.08
ift57	3	169409083	169434971	NC_041315.1	4	38408799	38430127	NC_006088.5	1	88731803	88748864	29.77	31.98	0.91	-0.14
kiaa1524	3	169146025	169176912					NC_006088.5	1	88827764	88854919	34.64	31.37	1.08	0.11
hjurp	3	169026586	169054763	NC_041315.1	4	38658995	38679175	NC_006088.5	1	88927958	88942320	33.15	32.01	1.01	0.02
guca1c	3	168976353	169016027	NC_041315.1	4	38685199	38712328	NC_006088.5	1	88957447	89017339	31.5	31.73	0.97	-0.04
plcxd2	3	167913920	167949607	NC_041315.1	4	39414973	39439105	NC_006088.5	1	89665058	89688969	30.83	34.2	0.88	-0.18
phldb2	3	167739036	167831578	NC_041315.1	4	39487217	39562934	NC_006088.5	1	89716470	89807634	33.11	35.39	0.91	-0.13
abhd10	3	167719181	167726597					NC_006088.5	1	89812141	89820285	32.04	31.14	1.01	0.01
tagln3	3	167695266	167709725					NC_006088.5	1	89826351	89837364	34.46	37.1	0.91	-0.14
tmprss7	3	167653606	167676255	NC_041315.1	4	39641694	39693945	NC_006088.5	1	89854422	89885055	29.02	31.18	0.91	-0.14
btla	3	167507928	167523857					NC_006088.5	1	90009250	90021577	31.26	37.34	0.82	-0.29
cggbp1	5	882424	888513	NC_041315.1	4	39781774	39795043	NC_006088.5	1	90028151	90034835	37.91	29.62	1.25	0.32
epha3	3	166699785	166961418	NC_041315.1	4	40127880	40344111	NC_006088.5	1	90417946	90639025	36.15	33.11	1.07	0.09
mgat1	2	192771473	192815634	NC_041329.1	18	345027	396878	NC_006088.5	1	90736218	90737406	27.62	28.01	0.96	-0.05
pros1	3	166348280	166396167	NC_041315.1	4	40530475	40563798	NC_006088.5	1	91097947	91130588	31.68	31.88	0.97	-0.04
arl13b	3	166292144	166344092	NC_041315.1	4	40564113	40607575	NC_006088.5	1	91130729	91180317	34.05	32.09	1.04	0.05
stx19	3	166309090	166318072	NC_041315.1	4	40582109	40591489	NC_006088.5	1	91144417	91160988	34.86	32.94	1.03	0.05
nsun3	3	166267196	166288780	NC_041315.1	4	40608290	40626079	NC_006088.5	1	91182332	91202046	31.45	32.34	0.95	-0.07
epha6	3	164179195	164606389					NC_006088.5	1	92140821	92634619	36.3	33.36	1.06	0.09
arl6	3	164154745	164172879	NC_041315.1	4	41809877	41821682	NC_006088.5	1	92636453	92655193	29.97	31.36	0.93	-0.1
crybg3	3	164069966	164146117	NC_041315.1	4	41827933	41884398	NC_006088.5	1	92707032	92757881	36.55	37.78	0.95	-0.08
mina	3	164055165	164067596					NC_006088.5	1	92756498	92770778	36.14	33.35	1.06	0.08
gabrr3	3	164012016	164042523	NC_041315.1	4	41903359	41940073	NC_006088.5	1	92773508	92808075	28.72	34.63	0.81	-0.3
dcaf6	3	163953531	164003507	NC_041315.1	4	41943626	41989077	NC_006088.5	1	92832757	92913144	32.54	32.68	0.97	-0.04
mpc2	3	163937427	163953103	NC_041315.1	4	41989538	42000920	NC_006088.5	1	92913598	92920427	55.18	59.91	0.9	-0.15
mpzl1								NC_006088.5	1	92921547	92959386	31.19	31.54	0.97	-0.05
rcsd1	3	163800469	163832498	NC_041315.1	4	42094873	42123665	NC_006088.5	1	92961975	92997132	33.89	29.16	1.14	0.18
creg1	3	163780988	163784385					NC_006088.5	1	93005542	93010415	26.07	28.96	0.88	-0.19
cd247	3	163682010	163729693	NC_041315.1	4	42138510	42203110	NC_006088.5	1	93018995	93065629	33.09	32.07	1.01	0.01
pou2f1	3	163499032	163669710	NC_041315.1	4	42203725	42303917	NC_006088.5	1	93066028	93187535	35.31	35.18	0.98	-0.03
dusp27	3	163432884	163457670	NC_041315.1	4	42334012	42353807	NC_006088.5	1	93194966	93220520	30.64	32.66	0.92	-0.13
gpa33	3	163400670	163433326	NC_041315.1	4	42356091	42378442	NC_006088.5	1	93224988	93234660	28.26	35.21	0.78	-0.35
mael	3	163365266	163388850	NC_041315.1	4	42384226	42400627	NC_006088.5	1	93236819	93259616	32.43	34.91	0.91	-0.14
ildr2	3	163279686	163365202	NC_041315.1	4	42410266	42448295	NC_006088.5	1	93256674	93290358	30.09	31.51	0.93	-0.1
ptgfrn	3	162966009	163141546	NC_041315.1	4	42568592	42651236	NC_006088.5	1	93408341	93473957	32.08	32.21	0.97	-0.04
igsf3	3	162472678	162606981	NC_041315.1	4	42994756	43041555	NC_006088.5	1	93574289	93651445	32.27	30.06	1.05	0.07
adprh	3	162454373	162471102	NC_041315.1	4	43044502	43054994	NC_006088.5	1	93651767	93662293	29.62	26.54	1.09	0.12
timmdc1	3	162394738	162406152	NC_041315.1	4	43097379	43105604	NC_006088.5	1	93698488	93704946	28.56	32.22	0.87	-0.21
poglut1	3	162354645	162379664	NC_041315.1	4	43109153	43123663	NC_006088.5	1	93705768	93721328	35.28	28.46	1.21	0.28
bcl9	3	162121016	162202077	NC_041315.1	4	43227160	43262531	NC_006088.5	1	93749573	93804478	32.91	29.54	1.09	0.12
acp6	3	162104646	162120823	NC_041315.1	4	43262847	43278191	NC_006088.5	1	93810692	93823316	31.71	29.46	1.05	0.07
gja5	3	162046779	162066674	NC_041315.1	4	43291534	43309682	NC_006088.5	1	93831629	93852699	35.82	31.55	1.11	0.15
gja8	3	161994041	161997026	NC_041315.1	4	43335334	43341414	NC_006088.5	1	93850707	93899333	31.35	26.4	1.16	0.21
pdzk1	3	161929820	161955411	NC_041315.1	4	43362515	43377293	NC_006088.5	1	93920637	93930018	31.54	32.73	0.94	-0.09
htr1f	3	161706013	161886160	NC_041315.1	4	43402834	43499450	NC_006088.5	1	93976211	94095818	34.29	22.85	1.47	0.55
pou1f1	3	161399660	161417846	NC_041315.1	4	43680434	43690816	NC_006088.5	1	94255838	94273551	37.14	26.15	1.39	0.47
chmp2b	3	161362687	161393915	NC_041315.1	4	43694941	43714664	NC_006088.5	1	94275896	94287427	34.98	33.66	1.02	0.02
vgll3	3	161248744	161285728	NC_041315.1	4	43755189	43781510	NC_006088.5	1	94356143	94382261	27.13	32.7	0.81	-0.3
cadm2	3	159964115	160591349	NC_041315.1	4	44092634	44494400	NC_006088.5	1	94725594	95380888	32.32	34.83	0.91	-0.14
gbe1	3	156969035	157221217	NC_041315.1	4	45540432	45693259	NC_006088.5	1	96500919	96683533	33.27	37.25	0.87	-0.2
robo1	3	155004592	155900463	NC_041315.1	4	46278439	46869208	NC_006088.5	1	97290537	97997572	31.41	34.07	0.9	-0.15
robo2	NW_003338777.1	149701	1255944	NC_041315.1	4	47157879	48109382	NC_006088.5	1	98282002	99187728	31.58	33.28	0.93	-0.11
lipi	NW_003338777.1	1571442	1606671					NC_006088.5	1	99391567	99412133	31.17	31.72	0.96	-0.06
rbm11	NW_003338777.1	1606764	1616836	NC_041315.1	4	48191986	48201503	NC_006088.5	1	99412210	99420044	38.79	30.93	1.23	0.29
hspa13	NW_003338777.1	1668120	1673074	NC_041315.1	4	48234224	48242927	NC_006088.5	1	99458895	99466501	38.73	32.42	1.17	0.22
samsn1	NW_003338777.1	1723108	1817130	NC_041315.1	4	48265382	48320716	NC_006088.5	1	99493732	99528370	26.46	29.87	0.87	-0.21
nrip1	NW_003338777.1	2046092	2153366	NC_041315.1	4	48449601	48527719	NC_006088.5	1	99694070	99767454	36.01	33.45	1.05	0.07
usp25	3	154399855	154477300	NC_041315.1	4	48724880	48780213	NC_006088.5	1	99983649	100073991	32.67	33.74	0.95	-0.08
cxadr	3	153714441	153757612					NC_006088.5	1	100685486	100716756	34.1	29.41	1.13	0.18
chodl	3	153446873	153608811	NC_041315.1	4	49421164	49446901	NC_006088.5	1	100912354	100941554	31.41	32.56	0.94	-0.09
tmprss15	3	153363378	153446769	NC_041315.1	4	49448153	49503735	NC_006088.5	1	100944277	101000706	33.21	34.92	0.93	-0.11
ncam2	3	150905782	151389778	NC_041315.1	4	50405645	50615436	NC_006088.5	1	102077230	102334412	29.69	31.15	0.93	-0.1
mrpl39	3	148331684	148352305	NC_041315.1	4	51703592	51718750	NC_006088.5	1	103804344	103813502	22.68	30.11	0.74	-0.44
jam2	3	148282742	148311926	NC_041315.1	4	51727151	51765183	NC_006088.5	1	103822635	103856297	35.15	32.07	1.07	0.1
atp5j	3	148278541	148282425					NC_006088.5	1	103856696	103860634	57.07	73	0.76	-0.39
gabpa	3	148257292	148278868	NC_041315.1	4	51774554	51790182	NC_006088.5	1	103860498	103890492	29.48	34	0.85	-0.24
app	3	148016938	148244086	NC_041315.1	4	51793014	51936321	NC_006088.5	1	103922156	104122174	31.97	34.14	0.91	-0.13
adamts1	3	147713721	147731347	NC_041315.1	4	52085423	52101890	NC_006088.5	1	104338321	104345974	33.62	33.62	0.98	-0.03
adamts5	3	147609006	147685120	NC_041315.1	4	52115256	52168224	NC_006088.5	1	104373266	104419335	31.84	33.59	0.93	-0.11
n6amt1	3	146649698	146656492	NC_041315.1	4	52752719	52762161	NC_006088.5	1	105292628	105295722	33.28	32.74	0.99	-0.01
ltn1	3	146617623	146649066	NC_041315.1	4	52761814	52789796	NC_006088.5	1	105298701	105326293	33.76	34.2	0.96	-0.05
rwdd2b	3	146600392	146609380	NC_041315.1	4	52791745	52797259	NC_006088.5	1	105326590	105330036	35.33	34.17	1.01	0.01
usp16	3	146579333	146600460	NC_041315.1	4	52796993	52814686	NC_006088.5	1	105330025	105350926	32.2	31.92	0.99	-0.02
cct8	3	146563535	146577523	NC_041315.1	4	52815797	52829241	NC_006088.5	1	105352203	105363123	32.27	30.7	1.03	0.04
map3k7cl	3	146490488	146529398	NC_041315.1	4	52830427	52868608	NC_006088.5	1	105373399	105407483	34.98	39.65	0.86	-0.21
bach1	3	146452514	146478896	NC_041315.1	4	52881048	52903991	NC_006088.5	1	105432043	105460627	27.57	34.98	0.77	-0.38
grik1	3	146163250	146416336	NC_041315.1	4	52935642	53093980	NC_006088.5	1	105502997	105663630	35.92	37.13	0.95	-0.08
tiam1	3	145722425	145992210	NC_041315.1	4	53201585	53391958	NC_006088.5	1	105803785	105948044	31.64	31.94	0.97	-0.05
sod1	3	145661897	145687541	NC_041315.1	4	53412922	53420416	NC_006088.5	1	105995337	105999776	35.98	34.86	1.01	0.01
scaf4	3	145594233	145660485	NC_041315.1	4	53421599	53451719	NC_006088.5	1	106003107	106047331	33.21	32.04	1.01	0.02
hunk	3	145489787	145564459	NC_041315.1	4	53517630	53590796	NC_006088.5	1	106067983	106131335	27.41	29.5	0.91	-0.14
mis18a	3	145377274	145387532	NC_041315.1	4	53652539	53659615	NC_006088.5	1	106218569	106223716	33.7	40.52	0.81	-0.3
mrap				NC_041315.1	4	53659714	53670013	NC_006088.5	1	106225011	106243435	27.7	30.29	0.89	-0.16
urb1	3	145292513	145365762	NC_041315.1	4	53662598	53711852	NC_006088.5	1	106242602	106287416	35.06	34.73	0.99	-0.02
eva1c	3	145216636	145278446	NC_041315.1	4	53717545	53765916	NC_006088.5	1	106296233	106332941	30.27	33.59	0.88	-0.18
synj1	3	145132123	145191905	NC_041315.1	4	53784125	53833081	NC_006088.5	1	106350128	106412028	31.95	32.43	0.96	-0.06
paxbp1	3	145091162	145127700	NC_041315.1	4	53834572	53859631	NC_006088.5	1	106415249	106452091	33.77	31.5	1.05	0.07
olig2	NW_003339175.1	87805	95500	NC_041315.1	4	53959888	53964292	NC_006088.5	1	106522741	106524545	34.28	28.61	1.17	0.23
ifnar2	NW_003339175.1	231731	252685					NC_006088.5	1	106580181	106591467	30.18	28.99	1.02	0.02
il10rb								NC_006088.5	1	106593977	106604819	30.21	34.96	0.84	-0.24
ifngr2				NC_041315.1	4	54127438	54149998	NC_006088.5	1	106645075	106653537	26.24	33.06	0.78	-0.37
tmem50b	3	143147374	143164448	NC_041315.1	4	54152181	54168227	NC_006088.5	1	106654656	106665904	29.83	27.08	1.08	0.11
dnajc28	3	143132628	143138593	NC_041315.1	4	54164419	54168236	NC_006088.5	1	106666788	106669691	34.35	33.52	1	0
son	3	142956012	143004456	NC_041315.1	4	54227893	54266624	NC_006088.5	1	106735603	106774569	31.08	28.47	1.07	0.09
donson	3	142938404	142955195	NC_041315.1	4	54266753	54278871	NC_006088.5	1	106775923	106782567	35.83	31.54	1.11	0.15
cryzl1	3	142891943	142933407	NC_041315.1	4	54280619	54314639	NC_006088.5	1	106782689	106803446	34.97	32.45	1.05	0.07
itsn1	3	142785206	142891598	NC_041315.1	4	54314738	54410374	NC_006088.5	1	106803697	106923015	32.17	34.04	0.92	-0.12
atp5o	3	142771731	142781426					NC_006088.5	1	106924124	106927541	30.83	33.88	0.89	-0.17
mrps6	3	142660370	142694807	NC_041315.1	4	54461391	54493377	NC_006088.5	1	106990173	107038098	30.68	34.97	0.86	-0.22
slc5a3	3	142680775	142694791	NC_041315.1	4	54461384	54475089	NC_006088.5	1	107004389	107012916	32.56	33.87	0.94	-0.09
kcne2	3	142528510	142530860	NC_041315.1	4	54557144	54561242	NC_006088.5	1	107152927	107179897	33.87	28.81	1.15	0.2
kcne1	3	142454566	142461915	NC_041315.1	4	54606220	54616244	NC_006088.5	1	107221184	107232751	24.67	32.43	0.74	-0.43
rcan1	3	142359636	142404192	NC_041315.1	4	54644999	54675004	NC_006088.5	1	107251544	107292351	31.59	35.73	0.86	-0.21
setd4	NW_003339663.1	23032	43496	NC_041315.1	4	55178855	55192561	NC_006088.5	1	107902289	107912700	29.86	33.3	0.88	-0.19
morc3	3	141445770	141483050	NC_041315.1	4	55294776	55323322	NC_006088.5	1	107973798	108001590	34.97	29.89	1.14	0.19
chaf1b	3	141421720	141435526	NC_041315.1	4	55326724	55343234	NC_006088.5	1	107999438	108023162	34.65	31.67	1.07	0.1
cldn14	3	141402250	141404295	NC_041315.1	4	55352744	55356075	NC_006088.5	1	108041892	108045193	35.44	38.14	0.91	-0.14
sim2	3	141143768	141206821	NC_041315.1	4	55443127	55493482	NC_006088.5	1	108141888	108202405	38.98	34.32	1.11	0.15
hlcs	3	141007723	141132436	NC_041315.1	4	55498302	55587918	NC_006088.5	1	108198675	108318051	32.94	29.81	1.08	0.11
pigp	3	140994318	141005226	NC_041315.1	4	55593263	55599875	NC_006088.5	1	108338599	108342549	55.6	51.35	1.06	0.08
ttc3				NC_041315.1	4	55600246	55662433	NC_006088.5	1	108342648	108402688	32.84	31.63	1.01	0.02
dscr3	3	140891781	140900854					NC_006088.5	1	108403292	108421285	28.67	29.72	0.94	-0.09
dyrk1a	3	140715956	140856840	NC_041315.1	4	55698837	55800099	NC_006088.5	1	108502527	108523250	28.75	32.54	0.86	-0.21
kcnj6	3	140505650	140681435	NC_041315.1	4	55818909	55925310	NC_006088.5	1	108549358	108714776	38.11	35.47	1.05	0.07
kcnj15	3	140300394	140336028	NC_041315.1	4	56028214	56056090	NC_006088.5	1	108846018	108871405	38.88	36.85	1.03	0.04
erg	3	140121501	140263334	NC_041315.1	4	56084340	56196137	NC_006088.5	1	108903306	109056759	31.25	33.46	0.91	-0.13
ets2	3	140002041	140023537	NC_041315.1	4	56263248	56278405	NC_006088.5	1	109131453	109144592	32.58	33.41	0.95	-0.07
psmg1	1	68530619	68540378	NC_041312.1	1	75131037	75140690	NC_006088.5	1	109260957	109269886	32.42	31	1.02	0.03
hmgn1	3	139707597	139719979	NC_041315.1	4	56487719	56492062	NC_006088.5	1	109326580	109333048	25.49	40.07	0.62	-0.69
wrb	3	139691296	139704701	NC_041315.1	4	56492270	56500056	NC_006088.5	1	109333210	109339709	38.04	34.81	1.07	0.09
lca5l	3	139659531	139691868	NC_041315.1	4	56501284	56520937	NC_006088.5	1	109339658	109356328	36.72	26.77	1.34	0.42
sh3bgr	3	139609077	139659584	NC_041315.1	4	56537494	56568589	NC_006088.5	1	109356837	109382729	21.76	25	0.85	-0.23
igsf5	3	139452993	139500382	NC_041315.1	4	56609755	56640520	NC_006088.5	1	109423649	109457608	33.63	36.65	0.9	-0.16
pcp4	3	139290363	139403147	NC_041315.1	4	56659417	56706508	NC_006088.5	1	109472666	109525376	33.45	40.74	0.8	-0.32
dscam	3	138792507	139226916	NC_041315.1	4	56754045	57099473	NC_006088.5	1	109564889	110018560	33.97	31.4	1.06	0.08
bace2	3	138533651	138591151	NC_041315.1	4	57187690	57229124	NC_006088.5	1	110162841	110220009	33.58	30.18	1.09	0.12
fam3b	3	138500088	138519499	NC_041315.1	4	57234649	57257838	NC_006088.5	1	110226202	110237561	30.04	34.8	0.84	-0.25
mx1	3	138430718	138456509					NC_006088.5	1	110239751	110260516	33.41	31.29	1.04	0.06
tmprss2	3	138389158	138429050	NC_041315.1	4	57302818	57325376	NC_006088.5	1	110261647	110282528	31.33	32.51	0.94	-0.09
ripk4	3	138237894	138270798	NC_041315.1	4	57399372	57426571	NC_006088.5	1	110341113	110362079	35.73	30.35	1.15	0.2
prdm15	3	138138702	138190198	NC_041315.1	4	57475225	57517100	NC_006088.5	1	110388916	110422103	34.81	32.73	1.04	0.06
c2cd2	3	138088863	138132957	NC_041315.1	4	57519782	57545287	NC_006088.5	1	110422260	110460425	35.13	32.33	1.06	0.09
zbtb21	3	138059951	138076513	NC_041315.1	4	57550550	57563848	NC_006088.5	1	110468227	110487639	34.92	37.45	0.91	-0.13
umodl1	3	138002800	138049705	NC_041315.1	4	57571646	57612503	NC_006088.5	1	110511721	110556685	35.33	31.28	1.1	0.14
tmprss3	3	137729194	137750732	NC_041315.1	4	57774888	57789453	NC_006088.5	1	110710898	110727284	32.69	30.76	1.04	0.05
ubash3a	3	137703579	137726902	NC_041315.1	4	57793322	57814095	NC_006088.5	1	110728977	110753448	34.19	29.92	1.12	0.16
rsph1	3	137675894	137699272	NC_041315.1	4	57817323	57830845	NC_006088.5	1	110757296	110765563	31.4	33.05	0.93	-0.11
slc37a1	3	137613653	137661400	NC_041315.1	4	57830971	57865940	NC_006088.5	1	110767884	110814157	34.73	34.87	0.97	-0.04
pde9a	3	137502646	137598640	NC_041315.1	4	57875960	57943668	NC_006088.5	1	110824282	110867357	35.74	33.09	1.06	0.08
wdr4	3	137453244	137475046					NC_006088.5	1	110880693	110902129	34.07	30.36	1.1	0.13
ndufv3	3	137432311	137449275	NC_041315.1	4	57986761	57997789	NC_006088.5	1	110902128	110909259	28.8	33.66	0.84	-0.26
pknox1	3	137351349	137407241	NC_041315.1	4	58013576	58045380	NC_006088.5	1	110926403	110969233	34.21	34.53	0.97	-0.05
u2af1	3	137175109	137192616	NC_041315.1	4	58136610	58152593	NC_006088.5	1	111041973	111057806	31.49	31.75	0.97	-0.05
cryaa	3	137146448	137174777	NC_041315.1	4	58153098	58167100	NC_006088.5	1	111075233	111078619	30.7	28.48	1.05	0.07
sik1	3	136952077	136969504	NC_041315.1	4	58264723	58279368	NC_006088.5	1	111210235	111240002	35.12	34.06	1.01	0.01
hsf2bp	3	136767433	136802282	NC_041315.1	4	58287604	58388256	NC_006088.5	1	111301450	111338168	34.8	34	1	0
rrp1b	3	136735842	136765697	NC_041315.1	4	58389349	58408415	NC_006088.5	1	111336046	111358043	31.36	30.74	1	0
pdxk	3	136641108	136707596	NC_041315.1	4	58418982	58472938	NC_006088.5	1	111372024	111416363	28.26	32.2	0.86	-0.22
agpat3	3	136467860	136591477	NC_041315.1	4	58505248	58572387	NC_006088.5	1	111465239	111561231	35.05	32.81	1.04	0.06
trappc10	3	136372297	136441032	NC_041315.1	4	58587488	58633929	NC_006088.5	1	111575933	111618355	34.23	33.82	0.99	-0.02
pwp2	3	136342513	136368137	NC_041315.1	4	58635843	58658139	NC_006088.5	1	111618752	111635323	32.16	36.37	0.86	-0.21
kdm6a	3	135576038	135785582	NC_041315.1	4	59021787	59128075	NC_006088.5	1	112146806	112296773	30.35	32.57	0.91	-0.14
fundc1	3	135489554	135510885	NC_041315.1	4	59170931	59179643	NC_006088.5	1	112334465	112351015	29.67	37.11	0.78	-0.36
efhc2	3	135343222	135439443	NC_041315.1	4	59198116	59252882	NC_006088.5	1	112372336	112431837	31.47	30.72	1	0
ndp	3	135237661	135273319	NC_041315.1	4	59289562	59315935	NC_006088.5	1	112500373	112520395	30.61	28.44	1.05	0.07
nyx	3	134125565	134145547	NC_041315.1	4	59921051	59926999	NC_006088.5	1	113301350	113321773	31.57	33.86	0.91	-0.13
ddx3x	3	134104324	134124468	NC_041315.1	4	59929867	59949415	NC_006088.5	1	113327064	113344500	33.83	34.39	0.96	-0.06
rpl8	3	134050786	134057399	NC_041315.1	4	59971320	59976077	NC_006088.5	1	113370855	113374557	32.33	37.68	0.84	-0.25
usp9x	3	133943838	134043754	NC_041315.1	4	59984870	60057091	NC_006088.5	1	113383681	113484148	33.56	33.79	0.97	-0.04
med14	3	133853630	133899125	NC_041315.1	4	60078299	60115265	NC_006088.5	1	113533440	113567752	34.04	34.67	0.96	-0.06
atp6ap2	3	133808761	133824916	NC_041315.1	4	60133375	60147183	NC_006088.5	1	113578706	113587894	35.03	31.82	1.08	0.1
bcor	3	133398874	133501344	NC_041315.1	4	60289185	60374141	NC_006088.5	1	113671449	113730131	36.31	33.26	1.07	0.09
mid1ip1	3	132695821	132700197	NC_041315.1	4	60751428	60754280	NC_006088.5	1	114046400	114047548	38.81	21.24	1.78	0.84
tspan7	3	132520302	132616650	NC_041315.1	4	60797277	60871072	NC_006088.5	1	114074132	114163611	31.08	31.24	0.97	-0.04
otc	3	132456812	132494881	NC_041315.1	4	60885976	60906929	NC_006088.5	1	114206427	114232333	35.53	35.68	0.97	-0.04
rpgr	3	132407264	132454759	NC_041315.1	4	60907709	60928734	NC_006088.5	1	114233955	114272545	31.3	33.04	0.93	-0.11
srpx	3	132357149	132402233	NC_041315.1	4	60945203	60991794	NC_006088.5	1	114302617	114343558	34.39	34.72	0.97	-0.05
sytl5	3	132272508	132350381	NC_041315.1	4	60957463	61057716	NC_006088.5	1	114347326	114425752	34.71	30.81	1.1	0.14
xk	3	132126693	132167265	NC_041315.1	4	61102463	61114754	NC_006088.5	1	114494389	114509421	31.97	24.14	1.29	0.37
lancl3	3	132071987	132117636	NC_041315.1	4	61121084	61146257	NC_006088.5	1	114510878	114546974	30.59	30.94	0.97	-0.05
prrg1	3	132018798	132053219	NC_041315.1	4	61174035	61188786	NC_006088.5	1	114579211	114609343	42.16	30.42	1.35	0.44
tmem47	3	130976803	131023931	NC_041315.1	4	61629078	61659698	NC_006088.5	1	115288951	115315641	30.87	29.25	1.03	0.04
nr0b1	3	129401057	129408656	NC_041315.1	4	63202180	63206708	NC_006088.5	1	115748143	115750436	22.6	25.35	0.87	-0.2
tab3	3	128999490	129095133	NC_041315.1	4	62982703	63011344	NC_006088.5	1	115986869	116028579	29.81	31.87	0.91	-0.13
gk	3	129108471	129146229	NC_041315.1	4	63048283	63089292	NC_006088.5	1	116057523	116093801	32.21	34.34	0.92	-0.13
dmd	3	127257380	128903888					NC_006088.5	1	116192483	117188566	33.3	32.57	1	0
pola1	3	126064049	126336324	NC_041315.1	4	64817689	64993773	NC_006088.5	1	119273954	119465158	34.2	30.91	1.08	0.11
pcyt1b	3	126015908	126057788	NC_041315.1	4	64993890	65023206	NC_006088.5	1	119478907	119510452	35.37	31.51	1.1	0.13
pdk3	3	125913640	125994621	NC_041315.1	4	65032364	65072158	NC_006088.5	1	119517517	119567431	33.57	37.21	0.88	-0.18
zfx	3	125814240	125834671	NC_041315.1	4	65117416	65132823	NC_006088.5	1	119614635	119637276	32.77	33.69	0.95	-0.07
eif2s3	3	125777909	125790924	NC_041315.1	4	65138513	65150482	NC_006088.5	1	119653160	119666011	38.57	32.16	1.17	0.23
klhl15	3	125742100	125773066	NC_041315.1	4	65150833	65175560	NC_006088.5	1	119666081	119695225	34.87	30.4	1.12	0.16
apoo	3	125693967	125721583	NC_041315.1	4	65191631	65206478	NC_006088.5	1	119704486	119735660	28.1	33.53	0.82	-0.29
sat1	3	125678238	125685691	NC_041315.1	4	65211900	65217092	NC_006088.5	1	119746943	119749754	32.41	29.73	1.06	0.09
acot9	3	125644279	125673210	NC_041315.1	4	65224607	65242237	NC_006088.5	1	119753970	119774894	35.87	35.15	1	0
prdx4	3	125627255	125641332	NC_041315.1	4	65243184	65250829	NC_006088.5	1	119778663	119787313	31.11	33.69	0.9	-0.15
ptchd1	3	125466634	125554481	NC_041315.1	4	65317964	65370909	NC_006088.5	1	119857155	119891981	32.96	35.32	0.91	-0.13
phex	3	124664047	124811788	NC_041315.1	4	65710648	65811809	NC_006088.5	1	120313524	120408979	34.01	32.09	1.04	0.05
sms	3	124613945	124642689	NC_041315.1	4	65819870	65855250	NC_006088.5	1	120425332	120468447	33.61	27.52	1.19	0.25
mbtps2	3	124563499	124598236	NC_041315.1	4	65866474	65888633	NC_006088.5	1	120488119	120522883	36.84	33.45	1.08	0.11
smpx	3	124518746	124558562	NC_041315.1	4	65891824	65920978	NC_006088.5	1	120533913	120576703	28.65	30.8	0.91	-0.14
klhl34	3	124498293	124503336	NC_041315.1	4	65930812	65934217	NC_006088.5	1	120593777	120600043	34.95	32.52	1.05	0.07
cnksr2	3	124298893	124493881	NC_041315.1	4	65935228	66226610	NC_006088.5	1	120598073	120804591	35.47	30.17	1.15	0.2
rps6ka3	3	123934750	123987978	NC_041315.1	4	66278131	66322057	NC_006088.5	1	121157514	121228575	35.68	35.26	0.99	-0.02
map7d2	3	123825376	123907633	NC_041315.1	4	66342853	66396458	NC_006088.5	1	121301247	121338461	32.3	31.67	1	-0.01
sh3kbp1	3	123529575	123771028	NC_041315.1	4	66438171	66574715	NC_006088.5	1	121384415	121607316	36.15	32.64	1.08	0.11
map3k15	3	123411336	123502885	NC_041315.1	4	66587327	66668622	NC_006088.5	1	121618950	121692149	33.59	33.01	0.99	-0.01
pdha1	3	123385943	123411469	NC_041315.1	4	66668696	66688851	NC_006088.5	1	121691902	121703921	34.4	35.43	0.95	-0.08
adgrg2	3	123231583	123305870	NC_041315.1	4	66737474	66782992	NC_006088.5	1	121765797	121820965	33.27	34.69	0.94	-0.09
phka2	3	123148654	123218565	NC_041315.1	4	66787815	66839495	NC_006088.5	1	121822203	121861972	33.19	33.59	0.97	-0.05
ppef1	3	123076071	123138809	NC_041315.1	4	66848678	66885449	NC_006088.5	1	121862318	121891752	33.2	35.76	0.91	-0.14
rs1	3	123020395	123025410	NC_041315.1	4	66901071	66910209	NC_006088.5	1	121901006	121912944	36.6	30.68	1.17	0.22
cdkl5	3	122890985	123001490	NC_041315.1	4	66921062	66987089	NC_006088.5	1	121916980	122042524	36.15	33.43	1.06	0.08
rai2	3	122748559	122791878	NC_041315.1	4	67058494	67104572	NC_006088.5	1	122146193	122179404	36.62	34.13	1.05	0.07
nhs	3	122334402	122625586	NC_041315.1	4	67204441	67443343	NC_006088.5	1	122342883	122596955	31.33	32.52	0.94	-0.09
reps2	3	122156535	122255706	NC_041315.1	4	67505261	67581029	NC_006088.5	1	122667265	122761316	31.66	31.98	0.97	-0.05
txlng	3	122114224	122138512	NC_041315.1	4	67590031	67632921	NC_006088.5	1	122797862	122820108	36.06	28.09	1.25	0.33
syap1	3	122094631	122106264	NC_041315.1	4	67634369	67645238	NC_006088.5	1	122824941	122843874	35.94	31.84	1.1	0.14
ctps2	3	122029502	122114089	NC_041315.1	4	67633127	67698863	NC_006088.5	1	122843947	122900763	33.12	33.96	0.95	-0.07
grpr	3	121764758	121796502	NC_041315.1	4	67792585	67816946	NC_006088.5	1	123085896	123107333	28.41	33.06	0.84	-0.25
ap1s2	3	121622270	121665356	NC_041315.1	4	67864353	67888894	NC_006088.5	1	123220526	123254525	38.16	31.72	1.18	0.23
zrsr2	3	121600710	121620281	NC_041315.1	4	67893483	67906538	NC_006088.5	1	123253847	123275292	36.47	33.18	1.07	0.1
tmem27	3	121548250	121580673					NC_006088.5	1	123277805	123301686	30.27	32.38	0.91	-0.13
ace2	3	121501128	121544841					NC_006088.5	1	123308711	123331184	30.47	31.75	0.94	-0.09
bmx	3	121472591	121500821	NC_041315.1	4	67946970	67978178	NC_006088.5	1	123333052	123360195	33.47	32.22	1.01	0.02
piga	6	53508070	53528040	NC_041317.1	6	18351	60836	NC_006088.5	1	123457995	123467287	35.11	35.68	0.96	-0.06
asb11				NC_041315.1	4	68039982	68049751	NC_006088.5	1	123465419	123483669	31.92	25.05	1.24	0.32
asb9								NC_006088.5	1	123496141	123510438	34.31	35.58	0.94	-0.09
mospd2	3	121169159	121203725	NC_041315.1	4	68152764	68173878	NC_006088.5	1	123679401	123713845	35.06	37.29	0.92	-0.12
fancb	3	121147923	121169029	NC_041315.1	4	68174123	68188326	NC_006088.5	1	123713849	123729213	33.44	32.04	1.02	0.03
glra2	3	120920803	121095050	NC_041315.1	4	68209789	68329750	NC_006088.5	1	123760274	123887833	37.77	40.6	0.91	-0.14
gemin8	3	120695806	120746557	NC_041315.1	4	68465512	68506972	NC_006088.5	1	124157187	124185246	31.34	22.9	1.34	0.42
gpm6b	3	120524526	120678702	NC_041315.1	4	68522088	68601549	NC_006088.5	1	124201058	124307982	32.12	29.94	1.05	0.07
ofd1	3	120474444	120523286	NC_041315.1	4	68598625	68627312	NC_006088.5	1	124308398	124337711	31.85	29.25	1.06	0.09
trappc2	3	120465610	120474327	NC_041315.1	4	68627392	68633138	NC_006088.5	1	124337755	124343421	34.44	32.86	1.02	0.03
rab9a	3	120451584	120463932	NC_041315.1	4	68635274	68642997	NC_006088.5	1	124344118	124352679	40.38	44.06	0.9	-0.16
tceanc	3	120440827	120446426	NC_041315.1	4	68647591	68651095	NC_006088.5	1	124357466	124367373	30.3	31.34	0.94	-0.08
prps2	3	119989981	120026766	NC_041315.1	4	68973922	69001905	NC_006088.5	1	124459861	124485273	42.66	46.22	0.9	-0.15
tlr7	3	120031332	120038783					NC_006088.5	1	124484206	124508751	30.5	30.76	0.97	-0.05
tmsb4x	3	120074103	120077365	NC_041315.1	4	68931008	68933246	NC_006088.5	1	124544420	124546074	19.08	22.82	0.82	-0.29
egfl6	3	120366682	120417729	NC_041315.1	4	68655186	68695399	NC_006088.5	1	124845519	124907268	36.39	31.6	1.12	0.17
frmpd4	3	119569948	119965313	NC_041315.1	4	69012454	69093281	NC_006088.5	1	124927949	125232328	33	32.4	0.99	-0.01
msl3	3	119510923	119536563	NC_041315.1	4	69350392	69370230	NC_006088.5	1	125359832	125384712	35.19	33.48	1.03	0.04
arhgap6	3	119450013	119495558	NC_041315.1	4	69399337	69575441	NC_006088.5	1	125422216	125726156	30.8	33.33	0.9	-0.15
mid1	3	119079543	119346223	NC_041315.1	4	69581179	69852555	NC_006088.5	1	125858499	126107977	34.94	35.21	0.97	-0.04
clcn4	3	118896398	118945486					NC_006088.5	1	126195715	126233549	34.59	35.55	0.95	-0.07
wwc3	3	118795226	118888487	NC_041315.1	4	69998860	70060463	NC_006088.5	1	126236844	126334725	32.78	34.13	0.94	-0.09
shroom2	3	118724896	118755742	NC_041315.1	4	70077968	70184816	NC_006088.5	1	126382157	126504735	31.35	30.73	1	0
gpr143	3	118552480	118578100	NC_041315.1	4	70188920	70208992	NC_006088.5	1	126518232	126531997	34.2	31.75	1.05	0.07
tbl1x	3	118377569	118549084	NC_041315.1	4	70210328	70341254	NC_006088.5	1	126545073	126745184	35.91	32.52	1.08	0.11
anos1	3	118028246	118138846	NC_041315.1	4	70494402	70587498	NC_006088.5	1	127043959	127168215	35.72	31.92	1.09	0.13
pnpla4	3	117644383	117678959	NC_041315.1	4	70826702	70837852	NC_006088.5	1	127493302	127513081	32.14	33.03	0.95	-0.07
sts	3	117218317	117361393	NC_041315.1	4	71028166	71098287	NC_006088.5	1	127707646	127827226	33.46	32.77	1	0
pudp	3	117100662	117218647	NC_041315.1	4	71097458	71158385	NC_006088.5	1	127826522	127896240	26.85	30.47	0.86	-0.22
prkx	3	114407535	114481771	NC_041315.1	4	72426341	72491795	NC_006088.5	1	129430051	129485175	31.31	33.04	0.93	-0.11
mxra5	3	114179255	114217771	NC_041315.1	4	72613514	72640725	NC_006088.5	1	129625903	129647637	35.52	30.98	1.12	0.16
gyg2	3	113912622	113936926	NC_041315.1	4	72777869	72795534	NC_006088.5	1	129814541	129833589	35.06	34.59	0.99	-0.01
xg				NC_041315.1	4	72798072	72817165	NC_006088.5	1	129834275	129858045	25.36	33.6	0.74	-0.44
dhrsx	3	113555594	113723215					NC_006088.5	1	129980980	130145451	36.56	30.95	1.15	0.21
zbed1	3	113708092	113722917	NC_041315.1	4	72891615	73028552	NC_006088.5	1	129981060	129993306	34.41	30.05	1.12	0.16
asmt	3	113364351	113385484	NC_041315.1	4	73173183	73185871	NC_006088.5	1	130327374	130334873	32.48	29.22	1.09	0.12
akap17a	3	113343635	113360440	NC_041315.1	4	73191228	73203197	NC_006088.5	1	130340807	130350924	31.19	29.29	1.04	0.06
asmtl	3	113259241	113282023	NC_041315.1	4	73260594	73280701	NC_006088.5	1	130423730	130450202	31.12	31.25	0.97	-0.04
slc25a6	3	113241438	113251085	NC_041315.1	4	73281703	73288093	NC_006088.5	1	130453455	130456984	33.28	31.11	1.04	0.06
shox	3	112626688	112660032	NC_041315.1	4	73664716	73687437	NC_006088.5	1	131032587	131040414	33.72	25.25	1.3	0.38
ppp2r3b	3	112267420	112330948	NC_041315.1	4	73892628	73933515	NC_006088.5	1	131249682	131299891	33.78	34.37	0.96	-0.06
gtpbp6	3	112175594	112191243	NC_041315.1	4	73990878	74001913	NC_006088.5	1	131359528	131370446	33.63	31	1.06	0.08
plcxd1	3	112152667	112173074	NC_041315.1	4	74002075	74015611	NC_006088.5	1	131370555	131388802	34.81	34.34	0.99	-0.01
jade3	3	112046519	112090086	NC_041315.1	4	74067524	74106536	NC_006088.5	1	131435816	131498508	34.51	37	0.91	-0.13
rp2	3	112022592	112038298	NC_041315.1	4	74112167	74126373	NC_006088.5	1	131504405	131522593	32.98	30.79	1.05	0.07
slc9a7	3	111941318	112009694	NC_041315.1	4	74130125	74182448	NC_006088.5	1	131536018	131606965	33.77	34.45	0.96	-0.06
chst7	3	111912369	111938366	NC_041315.1	4	74186924	74200675	NC_006088.5	1	131622976	131624723	23.17	21.19	1.07	0.1
tubgcp5	3	111841775	111869915	NC_041315.1	4	74222141	74240380	NC_006088.5	1	131653601	131676362	32.87	32.5	0.99	-0.02
nipa2	3	111729582	111756695	NC_041315.1	4	74305116	74322758	NC_006088.5	1	131746787	131757836	38.6	36.11	1.04	0.06
nipa1	3	111701042	111712218	NC_041315.1	4	74326570	74346565	NC_006088.5	1	131761289	131775936	33.83	27.27	1.21	0.28
herc2	3	111527622	111671015					NC_006088.5	1	131806220	131911397	35.22	33.55	1.03	0.04
oca2	3	111252899	111519039	NC_041315.1	4	74478827	74621936	NC_006088.5	1	131924919	132106250	31.25	38.3	0.8	-0.33
gabra5	3	110466452	110565126	NC_041315.1	4	75078621	75146555	NC_006088.5	1	132566479	132622426	37.05	35.65	1.02	0.02
atp10a	3	109753648	109921345	NC_041315.1	4	75449953	75603476	NC_006088.5	1	132986277	133096993	31.66	31.21	0.99	-0.01
ube3a	3	109595749	109629135	NC_041315.1	4	75684034	75723866	NC_006088.5	1	133181026	133230538	35.43	33.54	1.03	0.05
cnga3				NC_041315.1	4	75734561	75769854	NC_006088.5	1	133234443	133268781	35.29	32.98	1.05	0.06
vwa3b	3	109442200	109531130	NC_041315.1	4	75791681	75855937	NC_006088.5	1	133283021	133351907	34.84	32.63	1.04	0.06
tmem131	3	109312179	109399244	NC_041315.1	4	75881384	75955377	NC_006088.5	1	133387876	133479419	35.71	32.85	1.06	0.09
inpp4a	3	109169581	109290153	NC_041315.1	4	75980465	76078077	NC_006088.5	1	133488998	133602459	33	35.21	0.92	-0.13
unc50	3	109146562	109157578	NC_041315.1	4	76084961	76096632	NC_006088.5	1	133610603	133628682	36.02	32.58	1.08	0.11
mgat4a	3	109056163	109141644	NC_041315.1	4	76093622	76147266	NC_006088.5	1	133618519	133693798	34.34	32.66	1.03	0.04
tsga10	NW_003339488.1	4729	47744	NC_041315.1	4	76214480	76255436	NC_006088.5	1	133773169	133800170	32.41	32.39	0.98	-0.03
lipt1	NW_003339488.1	63265	69009	NC_041315.1	4	76260918	76263463	NC_006088.5	1	133803248	133805114	34.4	28.73	1.17	0.23
mitd1	NW_003339488.1	86262	94971	NC_041315.1	4	76263406	76270124	NC_006088.5	1	133809546	133813641	32.87	33.29	0.96	-0.05
mrpl30	NW_003339488.1	94916	98617	NC_041315.1	4	76270205	76275821	NC_006088.5	1	133813716	133816121	40.35	25.91	1.52	0.61
txndc9	NW_003339003.1	11680	25522	NC_041315.1	4	76278046	76284078	NC_006088.5	1	133848480	133859413	38.42	35.91	1.05	0.06
eif5b	NW_003339003.1	35286	77062	NC_041315.1	4	76285598	76315386	NC_006088.5	1	133860171	133890836	30.97	31.71	0.95	-0.07
rev1	NW_003339003.1	78899	134342	NC_041315.1	4	76316550	76357730	NC_006088.5	1	133893037	133946437	36.63	34.24	1.05	0.06
aff3	NW_003339003.1	154485	487910	NC_041315.1	4	76366790	76641698	NC_006088.5	1	133963507	134294207	32.12	33.47	0.94	-0.09
chst10	NW_003339003.1	627682	647819	NC_041315.1	4	76693724	76714817	NC_006088.5	1	134407602	134425901	31.3	29.49	1.04	0.05
pdcl3	NW_003339089.1	415931	427249	NC_041315.1	4	76746369	76757835	NC_006088.5	1	134464298	134469962	33.64	28.15	1.17	0.22
npas2	NW_003339089.1	243432	337801	NC_041315.1	4	76805794	76882147	NC_006088.5	1	134570730	134668759	33.74	33.68	0.98	-0.03
rpl31	NW_003339089.1	229272	238064	NC_041315.1	4	76885528	76891499	NC_006088.5	1	134671448	134676808	30.69	40.21	0.75	-0.42
tbc1d8	NW_003339089.1	179034	227538	NC_041315.1	4	76891750	76943790	NC_006088.5	1	134677024	134727147	35.14	35.51	0.97	-0.05
cnot11	NW_003339089.1	137098	153882	NC_041315.1	4	76952265	76962311	NC_006088.5	1	134748685	134759226	34.26	36.26	0.92	-0.12
rnf149	NW_003339089.1	107328	135787	NC_041315.1	4	76964238	76982801	NC_006088.5	1	134760865	134784121	28.77	33.27	0.84	-0.24
creg2	NW_003339089.1	79215	99997	NC_041315.1	4	76984326	76998225	NC_006088.5	1	134786593	134805381	34.52	28.68	1.18	0.23
map4k4	NW_003338790.1	1821385	2018044	NC_041315.1	4	77135676	77273025	NC_006088.5	1	134881018	135033361	34.38	32.8	1.02	0.03
il18r1	NW_003338790.1	1583930	1613503	NC_041315.1	4	77407585	77428424	NC_006088.5	1	135207947	135223219	30.41	32	0.93	-0.11
il18rap	NW_003338790.1	1552679	1576602	NC_041315.1	4	77437746	77454433	NC_006088.5	1	135227717	135245620	33.17	32.39	1	0
slc9a4	NW_003338790.1	1511901	1546661	NC_041315.1	4	77457920	77483210	NC_006088.5	1	135246919	135278427	33.76	31.86	1.04	0.05
slc9a2	NW_003338790.1	1436898	1478888	NC_041315.1	4	77499360	77531807	NC_006088.5	1	135300958	135332438	31.16	35.21	0.86	-0.21
mfsd9	NW_003338790.1	1416694	1433632	NC_041315.1	4	77529706	77540692	NC_006088.5	1	135336070	135347224	33.12	31.5	1.03	0.04
tmem182	NW_003338790.1	1357626	1409013	NC_041315.1	4	77544030	77561232	NC_006088.5	1	135354509	135378739	33.34	30.52	1.07	0.09
mrps9	NW_003338790.1	6003	46790	NC_041315.1	4	78574120	78613133	NC_006088.5	1	136339083	136370991	37.96	32.52	1.14	0.19
tgfbrap1	3	108921800	108947783	NC_041315.1	4	78631867	78658051	NC_006088.5	1	136391852	136425553	32.7	34.19	0.93	-0.1
fhl2	3	108873147	108905974	NC_041315.1	4	78676189	78707953	NC_006088.5	1	136439348	136481079	28.65	29.44	0.95	-0.07
nck2	3	108597808	108697543	NC_041315.1	4	78792901	78867596	NC_006088.5	1	136578811	136660607	34.53	33.47	1.01	0.01
uxs1	3	108454747	108515944	NC_041315.1	4	78912080	78953054	NC_006088.5	1	136727250	136782459	34.75	33.05	1.03	0.04
st6gal2	3	108241304	108321920	NC_041315.1	4	79038473	79114102	NC_006088.5	1	136948852	137123646	31.97	30.91	1.01	0.01
slc5a7	3	107703607	107738179	NC_041315.1	4	79444864	79487554	NC_006088.5	1	137342523	137368789	31.9	30.94	1.01	0.01
gcc2	3	107596643	107629799	NC_041315.1	4	79565412	79595966	NC_006088.5	1	137478979	137507779	34.45	32.7	1.03	0.04
lims1	3	107508373	107588123	NC_041315.1	4	79604799	79682109	NC_006088.5	1	137514681	137578645	32.13	33.56	0.94	-0.1
ccdc138	3	107401206	107453674	NC_041315.1	4	79729423	79758475	NC_006088.5	1	137803068	137812436	33.33	31.9	1.02	0.03
edar	3	107291747	107381797	NC_041315.1	4	79766361	79844464	NC_006088.5	1	137821536	137894512	29.47	30.1	0.96	-0.06
sh3rf3	3	106963465	107257916	NC_041315.1	4	79873556	80085682	NC_006088.5	1	137927597	138156476	35.34	31.95	1.08	0.11
sowahc				NC_041315.1	4	80158608	80165598	NC_006088.5	1	138198280	138203094	25.74	20.25	1.24	0.31
champ1	3	106816220	106824431	NC_041315.1	4	80193794	80202941	NC_006088.5	1	138242770	138253534	30.91	26.57	1.14	0.18
upf3a	3	106777617	106800143	NC_041315.1	4	80213941	80228800	NC_006088.5	1	138258479	138281841	37.29	37.9	0.96	-0.06
cdc16	3	106756841	106774988	NC_041315.1	4	80230945	80251855	NC_006088.5	1	138283640	138303660	33.41	31.26	1.04	0.06
rasa3	3	106548285	106726004	NC_041315.1	4	80251993	80401841	NC_006088.5	1	138347996	138478858	35.21	33.89	1.01	0.02
gas6	3	106410530	106471646	NC_041315.1	4	80452226	80498595	NC_006088.5	1	138512504	138549866	34.66	33.27	1.02	0.03
tmem255b	3	106344230	106408124	NC_041315.1	4	80497914	80540033	NC_006088.5	1	138554072	138617320	31.12	34.42	0.88	-0.18
atp4b	3	106303168	106316656	NC_041315.1	4	80560044	80566169	NC_006088.5	1	138638385	138644098	31.31	29.01	1.05	0.08
tfdp1	3	106247434	106303566	NC_041315.1	4	80568183	80596759	NC_006088.5	1	138648961	138690364	33.75	31.49	1.05	0.07
tmco3	3	106220804	106245061	NC_041315.1	4	80601358	80625329	NC_006088.5	1	138695873	138727922	33.28	35.7	0.91	-0.14
dcun1d2	3	106198144	106219692	NC_041315.1	4	80625421	80641938	NC_006088.5	1	138728030	138749323	37.21	35.08	1.04	0.05
adprhl1	3	106160642	106193661	NC_041315.1	4	80643784	80679439	NC_006088.5	1	138749447	138785559	35.2	32.15	1.07	0.1
grtp1	3	106079943	106114356	NC_041315.1	4	80703247	80725810	NC_006088.5	1	138803158	138831233	37.44	33.29	1.1	0.14
lamp1	3	106060256	106078240	NC_041315.1	4	80726815	80744224	NC_006088.5	1	138832128	138850358	30	31.76	0.92	-0.12
cul4a	3	106014239	106054558	NC_041315.1	4	80746270	80781143	NC_006088.5	1	138854760	138890354	33.66	34.81	0.94	-0.08
pcid2	3	105989926	106012318	NC_041315.1	4	80782888	80796576	NC_006088.5	1	138891004	138903905	31	31	0.98	-0.03
proz	3	105978324	105990278	NC_041315.1	4	80797198	80806203	NC_006088.5	1	138904391	138912205	35.16	31.48	1.09	0.13
mcf2l	3	105778729	105922531	NC_041315.1	4	80835963	80947803	NC_006088.5	1	138951176	139099745	34.41	34.41	0.98	-0.03
atp11a	3	105622297	105768796	NC_041315.1	4	80951817	81063340	NC_006088.5	1	139109141	139231492	34.79	32.51	1.05	0.06
tubgcp3	3	105516520	105585169	NC_041315.1	4	81081003	81136811	NC_006088.5	1	139263827	139314282	37.87	39.73	0.93	-0.1
col4a2	1	137277588	137420386	NC_041314.1	3	232083	427874	NC_006088.5	1	140249172	140391078	32.32	30.32	1.04	0.06
rab20	1	137422598	137431430	NC_041314.1	3	431608	450938	NC_006088.5	1	140394684	140418449	30.71	22.89	1.31	0.39
cars2	3	104453979	104500867	NC_041315.1	4	81858434	81903556	NC_006088.5	1	140506974	140546054	31.36	33.44	0.92	-0.13
ing1	3	104501537	104509012	NC_041315.1	4	81846180	81853940	NC_006088.5	1	140546081	140550989	34.93	27.21	1.25	0.33
ankrd10	3	104563665	104596929	NC_041315.1	4	81800425	81825771	NC_006088.5	1	140577898	140612182	35.05	31.49	1.09	0.12
arhgef7	3	104649975	104784007	NC_041315.1	4	81688906	81778583	NC_006088.5	1	140644717	140752733	34.05	33.72	0.99	-0.02
tnfsf13b	1	137084332	137092114	NC_041312.1	1	135905426	135913977	NC_006088.5	1	141624407	141642881	34.8	31.59	1.08	0.11
abhd13	1	137064477	137075834	NC_041312.1	1	135891762	135897822	NC_006088.5	1	141644840	141655299	34.61	32.2	1.05	0.07
lig4	1	137057311	137064384	NC_041312.1	1	135886766	135891706	NC_006088.5	1	141655421	141659430	32.68	32.31	0.99	-0.02
arglu1	3	103620522	103632191	NC_041315.1	4	82493134	82503551	NC_006088.5	1	142495232	142505858	30.9	29.63	1.02	0.03
efnb2	3	103536725	103607359	NC_041315.1	4	82509939	82567096	NC_006088.5	1	142513096	142554063	31.47	36.54	0.84	-0.25
slc10a2	3	101163403	101179678	NC_041315.1	4	84298768	84316608	NC_006088.5	1	144099552	144110941	36.18	33.88	1.04	0.06
ercc5								NC_006088.5	1	144193572	144209371	29.29	28.92	0.99	-0.02
bivm	3	101046669	101063681	NC_041315.1	4	84384798	84397435	NC_006088.5	1	144209954	144226593	28.75	32.11	0.87	-0.19
kdelc1	3	101019369	101043384					NC_006088.5	1	144230528	144241407	30.66	33.98	0.88	-0.18
mettl21c	3	100939763	100947819	NC_041315.1	4	84458777	84487859	NC_006088.5	1	144278090	144285924	32.03	38.97	0.8	-0.32
tpp2	3	100881961	100938966	NC_041315.1	4	84487463	84528281	NC_006088.5	1	144283852	144332776	31.95	33.02	0.95	-0.08
fgf14	3	100433169	100828670	NC_041315.1	4	84566041	84873809	NC_006088.5	1	144408036	144798242	27.78	29.93	0.91	-0.14
itgbl1	3	100231135	100419722	NC_041315.1	4	84882275	85010614	NC_006088.5	1	144798253	144931485	32.7	33.71	0.95	-0.08
nalcn	3	99931734	100225016	NC_041315.1	4	85018892	85204466	NC_006088.5	1	144940109	145155038	33.67	32.67	1.01	0.01
tmtc4	3	99681175	99755616	NC_041315.1	4	85319520	85364170	NC_006088.5	1	145329081	145386163	33.8	35.25	0.94	-0.09
ggact	3	99650526	99678292	NC_041315.1	4	85369123	85421264	NC_006088.5	1	145387492	145417364	21.23	42.72	0.49	-1.04
pcca	3	99366388	99649762	NC_041315.1	4	85391893	85618070	NC_006088.5	1	145416732	145689410	33.98	32.94	1.01	0.01
zic2				NC_041315.1	4	85670932	85676136	NC_006088.5	1	145716937	145722002	26.73	29.8	0.88	-0.19
zic5				NC_041315.1	4	85688892	85698437	NC_006088.5	1	145728360	145731837	24.19	24.17	0.98	-0.03
clybl	3	98943401	99168492	NC_041315.1	4	85762487	85962419	NC_006088.5	1	145748630	145880796	33.15	33.57	0.96	-0.05
tm9sf2	3	98896196	98931683	NC_041315.1	4	85968422	85996773	NC_006088.5	1	145918621	145946473	30.6	30.41	0.98	-0.02
ubac2	3	98759297	98868913	NC_041315.1	4	86019790	86095790	NC_006088.5	1	145983457	146084650	32.06	33.78	0.93	-0.11
gpr183	3	98796945	98828402	NC_041315.1	4	86054474	86061965	NC_006088.5	1	146021131	146034582	34.82	31.05	1.1	0.13
gpr18	3	98774423	98782385	NC_041315.1	4	86075046	86081889	NC_006088.5	1	146060182	146065443	35.42	28.86	1.2	0.26
dock9	3	98572325	98693068	NC_041315.1	4	86095938	86250610	NC_006088.5	1	146109700	146228834	34.42	33.26	1.01	0.02
slc15a1	3	98501911	98552425	NC_041315.1	4	86268154	86305956	NC_006088.5	1	146243022	146267056	35.63	32.18	1.08	0.11
stk24	3	98451720	98498046	NC_041315.1	4	86311938	86353015	NC_006088.5	1	146278754	146334798	33.91	34.96	0.95	-0.08
farp1	3	98214729	98447428	NC_041315.1	4	86354548	86543335	NC_006088.5	1	146337724	146535912	33.87	31.91	1.04	0.05
ipo5	3	98154299	98196537	NC_041315.1	4	86552940	86587826	NC_006088.5	1	146550084	146587993	33.26	31.01	1.05	0.07
rap2a	3	86073604	86098886	NC_041315.1	4	96243814	96262735	NC_006088.5	1	146711365	146744388	44.43	38.88	1.12	0.16
mbnl2	3	85946374	86043452	NC_041315.1	4	96147410	96222296	NC_006088.5	1	146761697	146870151	41.88	38.38	1.07	0.09
uggt2	3	85418012	85531473	NC_041315.1	4	95762889	95845336	NC_006088.5	1	147288683	147367495	32.05	32.03	0.98	-0.03
dnajc3	3	85358966	85417658	NC_041315.1	4	95715192	95762564	NC_006088.5	1	147369992	147401864	35.27	32.86	1.05	0.07
dzip1	3	85311296	85347682	NC_041315.1	4	95680784	95715023	NC_006088.5	1	147410973	147448715	35.52	35.74	0.97	-0.04
cldn10	3	85235157	85309111	NC_041315.1	4	95609825	95679626	NC_006088.5	1	147451550	147510990	37.42	27.04	1.35	0.43
abcc4	3	85020302	85221056	NC_041315.1	4	95347886	95475733	NC_006088.5	1	147470494	147695961	34.79	30.35	1.12	0.16
gpr180	3	84790785	84808962	NC_041315.1	4	95134437	95153810	NC_006088.5	1	147852197	147878350	33.42	26.66	1.22	0.29
tgds	3	84760713	84789688	NC_041315.1	4	95113451	95132515	NC_006088.5	1	147878341	147891038	35.19	28.8	1.19	0.26
dct	3	84711216	84745284	NC_041315.1	4	94991476	95010328	NC_006088.5	1	147897398	147922631	31.64	32.75	0.94	-0.08
gpc6	3	83725893	84691780	NC_041315.1	4	94160002	94978789	NC_006088.5	1	147929344	148680045	36.54	31.99	1.12	0.16
slitrk5	3	91190047	91200538	NC_041315.1	4	91678096	91685883	NC_006088.5	1	150812970	150818935	28.73	30.94	0.91	-0.14
slitrk6	3	92499662	92514235	NC_041315.1	4	90743751	90757053	NC_006088.5	1	151665231	151679314	33.95	27.31	1.21	0.28
slitrk1	3	93916398	93920421	NC_041315.1	4	89572857	89578359	NC_006088.5	1	152610299	152618350	29.81	27.97	1.04	0.06
spry2	3	96683717	96691425	NC_041315.1	4	87794260	87801395	NC_006088.5	1	154055377	154060716	35.71	34.94	1	0
ndfip2	3	96960338	97022675	NC_041315.1	4	87491444	87524369	NC_006088.5	1	154396098	154442843	33.52	38.6	0.85	-0.24
rbm26	3	97068234	97125594	NC_041315.1	4	87421223	87467916	NC_006088.5	1	154484732	154533145	34.04	34.33	0.97	-0.05
rnf219	3	97483161	97514245	NC_041315.1	4	87014164	87041090	NC_006088.5	1	154873117	154899984	30.25	28.53	1.04	0.05
ednrb	3	98046610	98075479	NC_041315.1	4	86626101	86650896	NC_006088.5	1	155291853	155305829	32.18	31.68	0.99	-0.01
slain1	3	86178240	86228976	NC_041315.1	4	96329972	96369334	NC_006088.5	1	155363810	155418979	37.48	27.02	1.36	0.44
mycbp2	3	86478958	86636385	NC_041315.1	4	96480509	96655931	NC_006088.5	1	155590258	155794536	33.79	32.89	1	0.01
fbxl3	3	86640914	86648008	NC_041315.1	4	96659249	96672616	NC_006088.5	1	155810094	155831149	30.8	32.45	0.93	-0.11
cln5	3	86652516	86660190	NC_041315.1	4	96673302	96680864	NC_006088.5	1	155832771	155841295	35.58	33.88	1.03	0.04
lmo7	3	87082841	87272916	NC_041315.1	4	97112135	97257559	NC_006088.5	1	156241202	156370180	29.7	28.6	1.01	0.02
uchl3	3	87307176	87336064	NC_041315.1	4	97265048	97295518	NC_006088.5	1	156376949	156428387	29.93	31.1	0.94	-0.09
commd6	3	87345333	87361681	NC_041315.1	4	97301698	97309651	NC_006088.5	1	156436726	156446730	31.24	39.63	0.77	-0.38
tbc1d4	3	87380248	87491857	NC_041315.1	4	97316242	97411095	NC_006088.5	1	156455039	156562060	35.79	32.07	1.09	0.12
klf5	3	88390852	88432489	NC_041315.1	4	98101937	98135458	NC_006088.5	1	157438785	157456439	32.17	31.96	0.98	-0.02
pibf1	3	88476853	88598487	NC_041315.1	4	98155846	98246551	NC_006088.5	1	157475886	157592642	33.37	31.5	1.03	0.05
dis3	3	88594257	88622732	NC_041315.1	4	98246700	98271015	NC_006088.5	1	157591898	157612694	31.28	32.55	0.94	-0.09
bora	3	88625136	88643669	NC_041315.1	4	98274919	98293121	NC_006088.5	1	157621738	157641309	26.6	29.38	0.88	-0.18
mzt1	3	88643685	88652955	NC_041315.1	4	98294271	98299721	NC_006088.5	1	157641451	157646198	38.09	31.08	1.2	0.26
dach1	3	82506891	82913181	NC_041315.1	4	98663626	99015803	NC_006088.5	1	158037352	158406041	31.01	31.53	0.96	-0.06
pcdh9	3	78719876	79709493	NC_041315.1	4	101053100	101898255	NC_006088.5	1	160443650	161152789	26.63	27.9	0.93	-0.1
pcdh20	3	76240479	76249866	NC_041315.1	4	103523283	103530512	NC_006088.5	1	163198027	163204708	31.92	33.04	0.94	-0.08
tdrd3	3	75723287	75813155	NC_041315.1	4	103777368	103843559	NC_006088.5	1	163529024	163630615	33.23	36.23	0.9	-0.16
diaph3	3	75534754	75670206	NC_041315.1	4	103878152	104002577	NC_006088.5	1	163718002	163957279	33.2	31.13	1.04	0.06
pcdh17	3	73953326	74143344	NC_041315.1	4	104969343	105106605	NC_006088.5	1	164777980	164865039	27.32	30.82	0.87	-0.21
olfm4	3	71180446	71224158	NC_041318.1	7	92285970	92305917	NC_006088.5	1	166896762	166920965	32.71	33.68	0.95	-0.08
pcdh8	3	70901442	70912125	NC_041318.1	7	92104451	92110455	NC_006088.5	1	167019605	167023868	31.5	31.76	0.97	-0.05
sugt1	3	70778210	70807395	NC_041318.1	7	91941715	91992901	NC_006088.5	1	167057758	167080314	33.39	32.95	0.99	-0.01
elf1	3	70748281	70768297	NC_041318.1	7	91843856	91938492	NC_006088.5	1	167082225	167169096	28.75	30.07	0.93	-0.1
wbp4	3	70670136	70687820	NC_041318.1	7	91817870	91843778	NC_006088.5	1	167169141	167191801	32.06	32.02	0.98	-0.03
mtrf1	3	70636951	70660334	NC_041318.1	7	91786723	91801182	NC_006088.5	1	167195780	167214311	33.2	33.86	0.96	-0.06
naa16	3	70584636	70631451	NC_041318.1	7	84837200	84874489	NC_006088.5	1	167213714	167277588	34.48	33.67	1	0
rgcc	3	70554583	70575903	NC_041318.1	7	84878551	84901593	NC_006088.5	1	167287787	167299948	35.29	35.38	0.97	-0.04
vwa8	3	70423059	70533712	NC_041318.1	7	84902188	84994660	NC_006088.5	1	167324505	167503014	32.3	31.76	0.99	-0.01
akap11	3	70207971	70238239	NC_041318.1	7	85120123	85138679	NC_006088.5	1	167725825	167766314	28.97	34.38	0.82	-0.28
tnfsf11	3	70130061	70153037	NC_041318.1	7	85203534	85233011	NC_006088.5	1	167839433	167861460	33.53	33.63	0.97	-0.04
epsti1	3	69841775	69920345	NC_041318.1	7	85331469	85371090	NC_006088.5	1	167989483	168042137	30.98	31.7	0.95	-0.07
dnajc15	3	69815938	69851651	NC_041318.1	7	85371530	85390303	NC_006088.5	1	168054028	168078478	36.05	35.4	0.99	-0.01
enox1	3	69555847	69729099	NC_041318.1	7	85409313	85708046	NC_006088.5	1	168111309	168477322	36	30.9	1.14	0.19
lacc1	NW_003338942.1	365625	442267	NC_041324.1	13	9973480	10005820	NC_006088.5	1	168498065	168546215	29.72	27.6	1.05	0.07
ccdc122	NW_003338942.1	349075	369161	NC_041324.1	13	9963663	9974793	NC_006088.5	1	168499547	168510967	32.74	35.09	0.91	-0.13
tsc22d1	NW_003338942.1	502172	579434	NC_041316.1	5	7910624	7966567	NC_006088.5	1	168740723	168819406	11.02	12.7	0.85	-0.24
nufip1	NW_003338942.1	592214	615739	NC_041316.1	5	7971307	7994485	NC_006088.5	1	168926223	168950766	29.67	30.09	0.96	-0.05
gpalpp1	NW_003338942.1	615758	645864					NC_006088.5	1	168950859	168965646	32.55	27.77	1.14	0.2
gtf2f2	NW_003338942.1	657798	747824	NC_041316.1	5	8033499	8112419	NC_006088.5	1	168988717	169082382	35.07	31.61	1.08	0.12
kctd4	NW_003338942.1	701258	704221	NC_041316.1	5	8064673	8066089	NC_006088.5	1	169017605	169018944	34	31.97	1.04	0.06
tpt1	NW_003338942.1	751613	762972	NC_041316.1	5	8116400	8125525	NC_006088.5	1	169085321	169089246	32.13	28.64	1.1	0.13
cog3	NW_003338844.1	1327212	1355795	NC_041316.1	5	11074276	11127708	NC_006088.5	1	169110893	169143086	36.25	31.36	1.13	0.18
spert	NW_003338844.1	1312103	1316709	NC_041316.1	5	11051724	11071556	NC_006088.5	1	169183556	169188020	22.36	20.13	1.09	0.12
zc3h13	1	132110247	132158771	NC_041314.1	3	9145031	9196265	NC_006088.5	1	169277443	169323227	32.3	29.49	1.07	0.1
cpb2	1	132089984	132107574	NC_041314.1	3	9197853	9224153	NC_006088.5	1	169324718	169340635	36.52	33.47	1.07	0.09
lrrc63	1	132210421	132240134	NC_041314.1	3	9062573	9077574	NC_006088.5	1	169403163	169407263	34.99	31.19	1.1	0.13
esd	1	132240856	132255036	NC_041314.1	3	9045847	9060572	NC_006088.5	1	169645532	169655054	36.76	36.73	0.98	-0.03
htr2a	1	137031032	137053757					NC_006088.5	1	169666572	169697160	32.07	23.27	1.35	0.43
sucla2	1	136997525	137022600	NC_041312.1	1	135862931	135882325	NC_006088.5	1	169965367	169985664	33.24	31.47	1.03	0.05
nudt15	1	136977433	136982441	NC_041312.1	1	135841533	135845284	NC_006088.5	1	169995439	169998554	26.16	27.73	0.92	-0.12
med4	1	136983649	136997475	NC_041312.1	1	135848710	135861349	NC_006088.5	1	170000865	170009973	33.21	25.87	1.25	0.33
itm2b	1	136937900	136961054	NC_041312.1	1	135816488	135836369	NC_006088.5	1	170036141	170062172	32.81	31.35	1.02	0.03
rb1	1	136866680	136935171	NC_041312.1	1	135757656	135812732	NC_006088.5	1	170072965	170150029	33.41	33.81	0.97	-0.05
lpar6	1	136894769	136896614	NC_041312.1	1	135779682	135781510	NC_006088.5	1	170117167	170118599	30.74	31.15	0.96	-0.05
rcbtb2	1	136830301	136864903	NC_041312.1	1	135725408	135757593	NC_006088.5	1	170149368	170180705	33.33	31.91	1.02	0.03
fndc3a	NW_003338749.1	2201280	2255918	NC_041330.1	Z	27581820	27637602	NC_006088.5	1	170318524	170431952	29.58	29.86	0.97	-0.05
mlnr	1	124034692	124037499	NC_041314.1	3	5618809	5622037	NC_006088.5	1	170432827	170436669	34.11	32.29	1.03	0.05
cdadc1								NC_006088.5	1	170447991	170463866	38.93	31.07	1.22	0.29
cab39l								NC_006088.5	1	170465092	170526727	34.53	28.57	1.18	0.24
setdb2	1	137439041	137485400	NC_041314.1	3	451013	494739	NC_006088.5	1	170526801	170564892	24.87	25.91	0.94	-0.09
rcbtb1	1	137486358	137527419	NC_041314.1	3	495950	536170	NC_006088.5	1	170565630	170586395	41.66	38.55	1.06	0.08
kpna3	1	137551183	137583973					NC_006088.5	1	170597160	170650244	33.75	31.31	1.05	0.07
spryd7	1	137587524	137600265	NC_041314.1	3	588658	599218	NC_006088.5	1	170674866	170683661	30.68	27.97	1.07	0.1
trim13	1	137602963	137607362	NC_041314.1	3	599798	601930	NC_006088.5	1	170686981	170696398	40.93	37.78	1.06	0.08
kcnrg	1	137613280	137616262	NC_041314.1	3	602033	606340	NC_006088.5	1	170697181	170700202	33.59	28.38	1.16	0.21
rnaseh2b	1	140176523	140198300					NC_006088.5	1	171220939	171282281	32.92	35.66	0.9	-0.15
fam124a	1	140105385	140139440	NC_041314.1	3	8290919	8303903	NC_006088.5	1	171336721	171377902	29.48	28.72	1	0
serpine3	1	139981439	139996081	NC_041314.1	3	8328842	8341490	NC_006088.5	1	171398844	171416703	30.74	31.86	0.94	-0.09
wdfy2	1	140000703	140063098	NC_041314.1	3	8406280	8451945	NC_006088.5	1	171476437	171542083	33.62	29.7	1.11	0.15
atp7b	1	132800303	132844176	NC_041314.1	3	8495167	8545295	NC_006088.5	1	171624631	171678658	28.73	29.7	0.94	-0.08
alg11	1	132791969	132800179	NC_041314.1	3	8545387	8553212	NC_006088.5	1	171682415	171686255	25.57	26.62	0.94	-0.09
nek3	1	132744397	132761948					NC_006088.5	1	171712433	171724948	30.72	33.38	0.9	-0.15
ckap2	1	132715754	132736300	NC_041314.1	3	8605407	8620079	NC_006088.5	1	171725372	171734808	31.53	28.89	1.07	0.09
vps36	1	132683142	132711954	NC_041314.1	3	8621757	8649522	NC_006088.5	1	171735034	171755699	30.19	34.73	0.85	-0.24
thsd1	1	132654110	132672916	NC_041314.1	3	8654194	8678150	NC_006088.5	1	171764039	171793826	31.8	31.48	0.99	-0.02
slc25a15	1	132576012	132594164	NC_041314.1	3	8727316	8749213	NC_006088.5	1	171829700	171845298	30.58	31.25	0.96	-0.07
mrps31	1	132548439	132571255	NC_041314.1	3	8749297	8765991	NC_006088.5	1	171849779	171873661	30.6	26.14	1.14	0.19
foxo1	1	132469520	132519571	NC_041314.1	3	8790859	8838805	NC_006088.5	1	171900263	171963540	34.18	28.32	1.18	0.24
cog6	1	132332833	132366988	NC_041314.1	3	8946973	8974035	NC_006088.5	1	172218064	172269404	33.65	33.43	0.98	-0.02
lhfp	1	132275273	132315607					NC_006088.5	1	172287762	172427229	31.87	31.99	0.97	-0.04
nhlrc3	1	132255093	132309788	NC_041314.1	3	9028684	9045569	NC_006088.5	1	172554893	172565969	32.11	30.97	1.01	0.02
proser1	1	23991653	24008234	NC_041312.1	1	32851616	32873922	NC_006088.5	1	172566162	172586926	32.45	35.2	0.9	-0.15
ufm1	NW_003339155.1	225796	230159	NC_041319.1	8	80370135	80373906	NC_006088.5	1	172895467	172906501	28.83	41.35	0.68	-0.55
trpc4	2	82098204	82274402	NC_041328.1	17	30744851	30810904	NC_006088.5	1	173127352	173268522	33.65	34.93	0.94	-0.09
postn	2	82311656	82395952	NC_041328.1	17	30673776	30723814	NC_006088.5	1	173372467	173406144	32.66	31.83	1	0
supt20h	2	82488573	82535291	NC_041328.1	17	30539779	30572044	NC_006088.5	1	173654548	173691649	34.71	34.23	0.99	-0.01
exosc8	2	82534972	82552732	NC_041328.1	17	30525002	30539975	NC_006088.5	1	173691575	173700701	37.07	34.93	1.04	0.05
smad9	3	181419736	181447421	NC_041315.1	4	30373037	30404826	NC_006088.5	1	173744731	173786052	26.97	30.77	0.86	-0.22
rfxap	3	181461133	181472045	NC_041315.1	4	30363628	30370525	NC_006088.5	1	173788648	173795652	26.24	28.16	0.91	-0.14
sertm1	3	181512031	181537765	NC_041315.1	4	30334797	30348579	NC_006088.5	1	173839989	173855830	31.31	28.88	1.06	0.08
ccna1	3	181636037	181656034	NC_041315.1	4	30257067	30271426	NC_006088.5	1	173950850	173956696	29.57	36.87	0.78	-0.35
spg20	3	181727163	181754308					NC_006088.5	1	173995677	174011950	31.19	28.76	1.06	0.08
dclk1	3	181840410	182107187	NC_041315.1	4	29917343	30159671	NC_006088.5	1	174079577	174317535	33.25	34.43	0.94	-0.08
rfc3	3	183105103	183124032	NC_041315.1	4	29213067	29233778	NC_006088.5	1	175226087	175239857	29.21	29.38	0.97	-0.04
stard13	NW_003339589.1	22756	70470	NC_041315.1	4	28943259	29104411	NC_006088.5	1	175277167	175576163	34.41	27.98	1.2	0.26
kl	NW_003339589.1	76746	82678	NC_041315.1	4	28914458	28938738	NC_006088.5	1	175584103	175631583	31.39	29.29	1.05	0.07
pds5b	3	183558343	183659058	NC_041315.1	4	28804124	28872069	NC_006088.5	1	175730272	175832231	34.09	32.08	1.04	0.05
n4bp2l2								NC_006088.5	1	175842295	175887181	31.41	29.42	1.04	0.06
n4bp2l1	3	183702102	183720994	NC_041315.1	4	28704009	28714265	NC_006088.5	1	175887797	175900550	32.26	28.59	1.1	0.14
brca2	3	183721565	183748129	NC_041315.1	4	28667018	28701899	NC_006088.5	1	175900477	175938644	32.32	32.04	0.99	-0.02
zar1l	3	183758338	183765704	NC_041315.1	4	28635223	28663388	NC_006088.5	1	175938760	175941165	30.13	27.69	1.06	0.09
fry	3	183768077	184055084	NC_041315.1	4	28474126	28656423	NC_006088.5	1	175942138	176186653	32.23	33.54	0.94	-0.09
b3glct	3	184178234	184299132	NC_041315.1	4	28307651	28419214	NC_006088.5	1	176283076	176328262	31.95	35.18	0.89	-0.17
hsph1	3	184320987	184346382	NC_041315.1	4	28264681	28293615	NC_006088.5	1	176342852	176364944	34.41	33.1	1.02	0.02
alox5ap	3	184490944	184504850	NC_041315.1	4	28120135	28127713	NC_006088.5	1	176416568	176424552	39.55	33.82	1.14	0.19
uspl1	3	184521025	184537393	NC_041315.1	4	28090553	28107900	NC_006088.5	1	176429802	176446252	27.34	27.2	0.98	-0.03
hmgb1	3	184556884	184568666	NC_041315.1	4	28063220	28072955	NC_006088.5	1	176491447	176499617	39.19	29.71	1.29	0.37
katnal1	3	184623024	184655758	NC_041315.1	4	27988404	28024992	NC_006088.5	1	176569175	176609189	31.98	35.21	0.89	-0.17
ubl3	3	184823191	184872085	NC_041315.1	4	27860489	27901695	NC_006088.5	1	176669165	176726088	41.78	33.38	1.22	0.29
slc7a1	3	184999280	185043832	NC_041315.1	4	27787545	27830968	NC_006088.5	1	176768276	176812419	33.73	31.08	1.06	0.08
mtus2	3	185055687	185492202	NC_041315.1	4	27476185	27777079	NC_006088.5	1	176814145	177082427	37.8	32.18	1.15	0.2
slc46a3	3	185540741	185569510	NC_041315.1	4	27421889	27442168	NC_006088.5	1	177110945	177124883	34.1	30.23	1.1	0.14
pomp	3	185573193	185580652	NC_041315.1	4	27408361	27418700	NC_006088.5	1	177125947	177134374	38.9	31.97	1.19	0.25
flt1	3	185628367	185771785	NC_041315.1	4	27270352	27382211	NC_006088.5	1	177165538	177266964	31.51	32.42	0.95	-0.07
pan3	3	185772804	185853373	NC_041315.1	4	27203167	27266982	NC_006088.5	1	177271327	177348868	32.42	32.56	0.97	-0.04
flt3	3	185864369	185939279	NC_041315.1	4	27148821	27199067	NC_006088.5	1	177355418	177390462	33.8	31.8	1.04	0.05
cdx2				NC_041315.1	4	27092770	27116997	NC_006088.5	1	177395776	177399233	34.57	31.17	1.08	0.12
pdx1	NW_003338853.1	1494122	1524662	NC_041315.1	4	27053617	27071791	NC_006088.5	1	177408738	177413501	30.55	16.98	1.76	0.81
mtif3	NW_003338853.1	1167959	1174185	NC_041315.1	4	26802890	26807830	NC_006088.5	1	177589239	177595005	31.5	37.52	0.82	-0.29
gtf3a	NW_003338853.1	1156993	1170524	NC_041315.1	4	26793708	26802926	NC_006088.5	1	177594912	177599321	28.71	26.8	1.05	0.07
rasl11a	NW_003338853.1	1067382	1072244	NC_041315.1	4	26741413	26746360	NC_006088.5	1	177647055	177648419	33.8	35.64	0.93	-0.11
rpl21	NW_003338853.1	1036921	1045804	NC_041315.1	4	26725868	26730247	NC_006088.5	1	177653547	177658054	35.88	38.14	0.92	-0.12
usp12	NW_003338853.1	1001607	1037018	NC_041315.1	4	26694450	26716507	NC_006088.5	1	177672601	177709050	38.71	42.13	0.9	-0.16
gpr12	NW_003338853.1	872622	875706	NC_041315.1	4	26603587	26606442	NC_006088.5	1	177816268	177837186	34.38	30.83	1.09	0.12
wasf3	NW_003338853.1	783469	839934	NC_041315.1	4	26550770	26582513	NC_006088.5	1	177841178	177913417	35.6	28.77	1.21	0.27
cdk8	NW_003338853.1	727375	773105	NC_041315.1	4	26481244	26522629	NC_006088.5	1	177955965	178025861	34.2	33.09	1.01	0.01
rnf6	NW_003338853.1	680930	691272	NC_041315.1	4	26469600	26481074	NC_006088.5	1	178030563	178041042	34.68	20.61	1.64	0.72
atp8a2	NW_003338853.1	190168	658331	NC_041315.1	4	26132295	26463666	NC_006088.5	1	178053063	178368323	31.77	33.56	0.92	-0.11
shisa2	NW_003338853.1	151109	162593	NC_041315.1	4	26104015	26114105	NC_006088.5	1	178373699	178377553	24.65	21.99	1.1	0.13
nup58	NW_003338853.1	84470	119281	NC_041315.1	4	26052949	26081066	NC_006088.5	1	178380227	178420214	31.67	31.07	1	-0.01
mtmr6	NW_003338853.1	51887	75302	NC_041315.1	4	26026815	26048772	NC_006088.5	1	178421297	178449068	31.25	31.39	0.97	-0.04
amer2	3	189153418	189157640	NC_041315.1	4	25972613	25984195	NC_006088.5	1	178475645	178486380	25.94	25.22	1	0.01
spata13	3	188885033	189178509					NC_006088.5	1	178578943	178727840	36.65	33.79	1.06	0.08
c1qtnf9								NC_006088.5	1	178730431	178738726	35.77	37.36	0.94	-0.1
mipep	3	188801925	188863975	NC_041315.1	4	25720116	25771332	NC_006088.5	1	178738887	178807133	35.51	32.25	1.08	0.11
sacs	3	188596719	188670148	NC_041315.1	4	25546840	25639579	NC_006088.5	1	178925593	178983820	30.36	36.31	0.82	-0.29
sgcg	3	188560867	188596373	NC_041315.1	4	25518869	25549722	NC_006088.5	1	178986655	179102540	32.56	30.44	1.04	0.06
fgf9	3	188008556	188053887	NC_041315.1	4	25061906	25103947	NC_006088.5	1	179687260	179717135	30.84	29.3	1.03	0.04
micu2	3	187871216	187963571	NC_041315.1	4	24974292	25043840	NC_006088.5	1	179741513	179879589	35.9	35.69	0.98	-0.03
zdhhc20	3	187796978	187855750	NC_041315.1	4	24919749	24963180	NC_006088.5	1	179883870	179928833	39.3	35.95	1.07	0.09
mrpl57	3	187791431	187795381	NC_041315.1	4	24908076	24911886	NC_006088.5	1	179930607	179931814	37.11	39.56	0.92	-0.13
sap18	3	187765121	187770330	NC_041315.1	4	24891892	24896376	NC_006088.5	1	179947434	179949736	24.54	37.75	0.64	-0.66
lats2	3	187651404	187724775	NC_041315.1	4	24823253	24891639	NC_006088.5	1	179976378	180023242	28.51	33.67	0.83	-0.27
xpo4	3	187557710	187637183	NC_041315.1	4	24743502	24809402	NC_006088.5	1	180044066	180118107	34.37	32.95	1.02	0.03
eef1akmt1	3	187538159	187547264	NC_041315.1	4	24732637	24738890	NC_006088.5	1	180122214	180133571	39.19	36.53	1.05	0.07
il17d	3	187508798	187529050	NC_041315.1	4	24717404	24728195	NC_006088.5	1	180137515	180137865	33.69	32.2	1.02	0.03
ift88	3	187453771	187501552	NC_041315.1	4	24675456	24712831	NC_006088.5	1	180147546	180181820	36.08	35.4	1	-0.01
cryl1	3	187421333	187445634	NC_041315.1	4	24637516	24672280	NC_006088.5	1	180188436	180239004	31.31	32.93	0.93	-0.11
gjb2				NC_041315.1	4	24565474	24572905	NC_006088.5	1	180294098	180307555	35.47	32.05	1.08	0.11
gja3	3	187268235	187269835	NC_041315.1	4	24547320	24560356	NC_006088.5	1	180306572	180320654	29.7	31.92	0.91	-0.14
zmym2	3	187128094	187234722	NC_041315.1	4	24466399	24526755	NC_006088.5	1	180354562	180451644	31.49	32.17	0.96	-0.06
pspc1	3	187037000	187095783	NC_041315.1	4	24392657	24450631	NC_006088.5	1	180485235	180553187	35.44	30.68	1.13	0.17
mphosph8	3	187005774	187028945	NC_041315.1	4	24372158	24391932	NC_006088.5	1	180549515	180568884	34.41	33.61	1	0
parp4	3	186937408	186997956	NC_041315.1	4	24294767	24370321	NC_006088.5	1	180569335	180612944	33.06	31.89	1.01	0.02
cenpj	3	186905884	186933036	NC_041315.1	4	24262639	24281248	NC_006088.5	1	180615148	180632392	33.71	34.29	0.96	-0.06
rnf17	3	186821172	186905562	NC_041315.1	4	24215512	24262429	NC_006088.5	1	180634724	180677573	33.65	29.63	1.11	0.15
arhgap20	3	186530049	186641496	NC_041315.1	4	24006218	24092166	NC_006088.5	1	180822193	180882175	33.26	33.96	0.96	-0.06
fdx1	3	186482156	186495404	NC_041315.1	4	23973548	23988655	NC_006088.5	1	180901126	180917603	29.37	31.54	0.91	-0.14
rdx	3	186419160	186459180	NC_041315.1	4	23924010	23956157	NC_006088.5	1	180936321	180971907	35.42	37.34	0.93	-0.11
zc3h12c	3	186345113	186397739	NC_041315.1	4	23864822	23917202	NC_006088.5	1	180981934	181027936	31.78	30.09	1.03	0.05
ddx10	5	125140430	125365517	NC_041315.1	4	23415377	23575074	NC_006088.5	1	181322902	181487159	34.65	33.27	1.02	0.02
exph5	5	125031973	125134022	NC_041315.1	4	23353250	23409399	NC_006088.5	1	181515015	181549729	31.76	26.32	1.18	0.24
kdelc2	5	124997019	125026674					NC_006088.5	1	181553541	181572944	26.82	29.88	0.88	-0.19
atm	5	124955241	124967199	NC_041315.1	4	23253334	23307802	NC_006088.5	1	181590958	181650696	34.1	32.67	1.02	0.03
npat								NC_006088.5	1	181650709	181671860	31	32.74	0.92	-0.11
acat1	NW_003339206.1	244926	261579	NC_041315.1	4	23217066	23230513	NC_006088.5	1	181673273	181685648	38.74	42.39	0.89	-0.16
cul5	NW_003339206.1	194557	241358	NC_041315.1	4	23177289	23214650	NC_006088.5	1	181690174	181720556	35.17	32.31	1.06	0.09
rab39a	NW_003339206.1	175538	187670	NC_041315.1	4	23161252	23171663	NC_006088.5	1	181729900	181742587	27.67	24.92	1.08	0.12
slc35f2	NW_003339206.1	134181	165258	NC_041315.1	4	23118632	23145106	NC_006088.5	1	181760874	181779146	32.18	31.6	0.99	-0.01
sln	NW_003339206.1	80162	80792	NC_041315.1	4	23081015	23083846	NC_006088.5	1	181822186	181824110	30.66	29.57	1.01	0.02
elmod1	NW_003339206.1	38643	64358	NC_041315.1	4	23025529	23073068	NC_006088.5	1	181839718	181882063	31.25	29.1	1.05	0.07
alkbh8	3	189400108	189502993	NC_041315.1	4	22953722	23025951	NC_006088.5	1	181880054	181939492	32.62	30.06	1.06	0.08
cwf19l2	3	189527642	189617814	NC_041315.1	4	22863426	22937393	NC_006088.5	1	181960594	182023275	31.05	34.03	0.89	-0.17
vmo1								NC_006088.5	1	182061433	182065423	27.41	23.15	1.16	0.21
gucy1a2	3	189977176	190177065	NC_041315.1	4	22364600	22501984	NC_006088.5	1	182130418	182275691	34.53	35.57	0.95	-0.08
aasdhppt	3	190311792	190338200	NC_041315.1	4	22226463	22255423	NC_006088.5	1	182414225	182437220	37.83	30.43	1.21	0.28
kbtbd3	3	190339550	190347631	NC_041315.1	4	22215347	22226248	NC_006088.5	1	182437359	182454856	34.78	36.09	0.94	-0.09
msantd4	3	190343693	190367684	NC_041315.1	4	22206227	22213198	NC_006088.5	1	182456211	182471903	36.77	28.35	1.27	0.34
gria4	3	190375770	190707507	NC_041315.1	4	21975943	22197434	NC_006088.5	1	182496376	182720301	35.47	35.78	0.97	-0.05
pdgfd	3	191399725	191603602	NC_041315.1	4	21316714	21457491	NC_006088.5	1	183232488	183372535	29.51	27.12	1.06	0.09
dync2h1	3	191762329	191949725	NC_041315.1	4	21049930	21203600	NC_006088.5	1	183536345	183673172	32.7	31.96	1	0
dcun1d5	3	191953341	191981602	NC_041315.1	4	21034456	21048417	NC_006088.5	1	183673320	183689576	38.87	27.97	1.36	0.44
yap1	3	192364898	192476797	NC_041315.1	4	20614805	20694928	NC_006088.5	1	183976430	184056963	28.4	28.89	0.96	-0.06
angptl5	3	192541844	192574983	NC_041315.1	4	20548116	20566733	NC_006088.5	1	184143212	184157279	36.29	34.6	1.02	0.04
arhgap42	3	193007102	193217064	NC_041315.1	4	19997979	20190352	NC_006088.5	1	184542775	184703330	30.79	30.8	0.98	-0.03
ccdc82	3	195047455	195060246	NC_041315.1	4	18418167	18429498	NC_006088.5	1	186228658	186242501	31.36	31.45	0.97	-0.04
maml2	3	195069124	195286095	NC_041315.1	4	18288704	18414237	NC_006088.5	1	186248216	186459976	22.93	20.95	1.07	0.1
mtmr2	3	195295083	195344323	NC_041315.1	4	18241775	18276763	NC_006088.5	1	186477871	186536162	29.26	29.65	0.96	-0.05
cep57	3	195354412	195376292	NC_041315.1	4	18218324	18237239	NC_006088.5	1	186544479	186557880	32.96	30.39	1.06	0.08
fam76b	3	195376608	195389282	NC_041315.1	4	18200589	18217821	NC_006088.5	1	186558458	186569255	35.47	34.09	1.02	0.02
sesn3	3	195475481	195541424	NC_041315.1	4	18032515	18097144	NC_006088.5	1	186709431	186755154	30	29.75	0.99	-0.02
endod1	3	195560045	195584687	NC_041315.1	4	18012734	18028809	NC_006088.5	1	186758984	186769074	24	19.98	1.17	0.23
cwc15	3	195611218	195623015	NC_041315.1	4	17988176	17998906	NC_006088.5	1	186781159	186795987	32.69	29.56	1.08	0.11
amotl1	3	195636353	195753040	NC_041315.1	4	17915261	17977564	NC_006088.5	1	186812201	186878971	32.42	31.48	1.01	0.01
fut4	3	195845867	195847427	NC_041315.1	4	17814810	17818256	NC_006088.5	1	186918010	186919080	27.43	25.67	1.04	0.06
ankrd49	3	195877170	195885852	NC_041315.1	4	17762304	17773352	NC_006088.5	1	186932542	186935338	31.86	30.05	1.04	0.05
gpr83	NW_003339012.1	715457	720902	NC_041315.1	4	17719603	17729292	NC_006088.5	1	186958524	186961472	30.03	32.32	0.91	-0.14
panx1	3	195937641	195961144	NC_041315.1	4	17686202	17704095	NC_006088.5	1	186973798	186995102	33.33	26.28	1.24	0.31
hephl1	3	195965713	196006606	NC_041315.1	4	17640405	17681152	NC_006088.5	1	186998175	187034776	31.45	30.67	1	0
vstm5	3	196054405	196067772	NC_041315.1	4	17576524	17587224	NC_006088.5	1	187083370	187092170	30.32	45.62	0.65	-0.62
med17				NC_041315.1	4	17564479	17576919	NC_006088.5	1	187090984	187105017	32.23	29.98	1.05	0.07
cep295	3	196127633	196172495	NC_041315.1	4	17497858	17534626	NC_006088.5	1	187126323	187166103	30.86	31.17	0.97	-0.05
smco4	3	196213792	196299366					NC_006088.5	1	187190211	187218915	37.78	42.76	0.86	-0.21
slc36a4	3	196429771	196589036	NC_041315.1	4	17223818	17345001	NC_006088.5	1	187334848	187440561	30.49	29.42	1.01	0.02
mtnr1b	3	196736244	196811561	NC_041315.1	4	17098907	17133246	NC_006088.5	1	187524139	187544369	25.68	24.24	1.03	0.05
fat3	3	196997053	197570287	NC_041315.1	4	16531402	16994701	NC_006088.5	1	187668483	188084168	31.07	33.73	0.9	-0.15
chordc1	3	198696120	198715335	NC_041315.1	4	15731201	15747963	NC_006088.5	1	188868387	188880806	35.59	41.44	0.84	-0.25
nox4	3	198898190	199031746	NC_041315.1	4	15458044	15560292	NC_006088.5	1	189025655	189140212	36.82	37.4	0.96	-0.06
tyr	3	199046169	199124701	NC_041315.1	4	15392794	15448817	NC_006088.5	1	189153120	189202973	26.77	30.97	0.84	-0.24
grm5	3	199155159	199429105	NC_041315.1	4	15112089	15371988	NC_006088.5	1	189235312	189490666	33.24	29.29	1.11	0.15
ctsc	3	199471447	199507539	NC_041315.1	4	15029532	15058867	NC_006088.5	1	189543432	189559491	31.81	29.12	1.07	0.09
tmem135	3	199789310	199977160	NC_041315.1	4	14577399	14758942	NC_006088.5	1	189832683	189998640	26.2	29.62	0.86	-0.21
fzd4	3	200019313	200029841	NC_041315.1	4	14540171	14547695	NC_006088.5	1	190012922	190017370	26.39	24.14	1.07	0.09
prss23	3	200137084	200156052	NC_041315.1	4	14407526	14426464	NC_006088.5	1	190098085	190104362	32.75	33.14	0.97	-0.05
me3	3	200211774	200347956	NC_041315.1	4	14259003	14356461	NC_006088.5	1	190149688	190268115	30.69	30.66	0.98	-0.03
rab30	3	202144521	202223668	NC_041315.1	4	12844430	12885871	NC_006088.5	1	190337158	190385603	34.23	27.5	1.22	0.28
ankrd42	3	202048936	202074887	NC_041315.1	4	12942017	12961771	NC_006088.5	1	190428653	190446204	30.24	31.29	0.94	-0.08
ccdc90b	3	202038168	202048514	NC_041315.1	4	12964709	12976457	NC_006088.5	1	190445980	190454198	32.44	26.98	1.17	0.23
dlg2	3	200687587	201955908	NC_041315.1	4	13020521	13974450	NC_006088.5	1	190535984	191534865	34.38	31.47	1.07	0.09
tmem126a								NC_006088.5	1	191534907	191541194	25	34.67	0.7	-0.51
ccdc89	3	200657557	200660954	NC_041315.1	4	13989971	13995988	NC_006088.5	1	191549704	191552051	42.81	30.21	1.38	0.47
sytl2	3	200583229	200654946	NC_041315.1	4	13997764	14058739	NC_006088.5	1	191553785	191606555	30.98	27.28	1.11	0.15
ccdc83	3	200508105	200553211	NC_041315.1	4	14084205	14104048	NC_006088.5	1	191606646	191632202	29.61	25.79	1.12	0.17
picalm	3	200434982	200514639	NC_041315.1	4	14105970	14168650	NC_006088.5	1	191631664	191694179	33.25	33.59	0.97	-0.05
eed	3	200402906	200419185	NC_041315.1	4	14195749	14209730	NC_006088.5	1	191746049	191761996	34.04	30.26	1.1	0.14
gab2	NW_003338884.1	254855	456461	NC_041315.1	4	10628424	10799451	NC_006088.5	1	193942504	194032912	28.88	29.4	0.96	-0.06
usp35	NW_003338884.1	465567	499039					NC_006088.5	1	194251099	194279096	28.84	35.81	0.79	-0.35
kctd21	NW_003338884.1	501738	509861	NC_041315.1	4	10549575	10562054	NC_006088.5	1	194279097	194290853	34.88	30.35	1.12	0.17
alg8	NW_003338884.1	515647	533618	NC_041315.1	4	10530966	10544996	NC_006088.5	1	194292666	194303045	32.89	33.04	0.97	-0.04
kctd14	NW_003338884.1	581891	586898	NC_041315.1	4	10476184	10481148	NC_006088.5	1	194325421	194328770	34.59	36.45	0.93	-0.11
ints4	NW_003338884.1	595128	630197	NC_041315.1	4	10431731	10469564	NC_006088.5	1	194331658	194364002	30.79	31.02	0.97	-0.04
aamdc	NW_003338884.1	638360	656922	NC_041315.1	4	10413052	10430016	NC_006088.5	1	194363484	194374740	29.94	30.91	0.95	-0.08
rsf1	NW_003338884.1	657231	723717	NC_041315.1	4	10368329	10412820	NC_006088.5	1	194375001	194433346	34.46	29.28	1.15	0.2
clns1a	NW_003338884.1	729419	747140	NC_041315.1	4	10348152	10358782	NC_006088.5	1	194436212	194446357	31.82	27.47	1.13	0.18
aqp11	NW_003338884.1	750182	761554	NC_041315.1	4	10332375	10345269	NC_006088.5	1	194446073	194462939	30.96	29.9	1.01	0.02
pak1	NW_003338884.1	826120	932484	NC_041315.1	4	10199799	10307493	NC_006088.5	1	194485124	194554457	35.46	35.8	0.97	-0.05
myo7a	NW_003338884.1	1034397	1190340	NC_041315.1	4	9962792	10143320	NC_006088.5	1	194595112	194693931	32.87	30.13	1.07	0.09
capn5	NW_003339040.1	16390	115176	NC_041315.1	4	9870874	9954017	NC_006088.5	1	194696828	194747129	32.98	34.71	0.93	-0.11
omp	NW_003339040.1	38448	39355	NC_041315.1	4	9922965	9924974	NC_006088.5	1	194712339	194717972	38.28	28.19	1.33	0.41
acer3	NW_003339040.1	136682	176145	NC_041315.1	4	9791697	9841891	NC_006088.5	1	194760383	194819421	34.3	30.7	1.09	0.13
gucy2f				NC_041315.1	4	9567009	9621546	NC_006088.5	1	194959652	195002780	28.86	26.53	1.06	0.09
lrrc32	NW_003339040.1	435234	453721	NC_041315.1	4	9538213	9558590	NC_006088.5	1	195021647	195040782	29.5	30.05	0.96	-0.06
emsy	NW_003339040.1	502176	550945	NC_041315.1	4	9451500	9500280	NC_006088.5	1	195122953	195162521	30.1	31.2	0.94	-0.09
wnt11	NW_003338845.1	1597899	1667183	NC_041315.1	4	9192611	9276477	NC_006088.5	1	195311154	195346046	34.99	28.28	1.21	0.27
uvrag	NW_003338845.1	1332566	1435788	NC_041315.1	4	8947149	9040491	NC_006088.5	1	195482144	195567724	33.69	31.75	1.04	0.05
numa1	NW_003339339.1	110081	168235	NC_041315.1	4	4847982	4922823	NC_006088.5	1	195605956	195620667	30.48	27.33	1.09	0.12
lamtor1	NW_003339339.1	67962	83992	NC_041315.1	4	4935371	4951847	NC_006088.5	1	195624134	195629492	29.41	31.67	0.91	-0.14
anapc15	NW_003339339.1	8433	21419	NC_041315.1	4	4990708	4996119	NC_006088.5	1	195634137	195636365	30.27	31.4	0.94	-0.09
wdr73	NW_003339446.1	126427	151079	NC_041315.1	4	5919412	5956114	NC_006088.5	1	195654471	195660367	26.68	26.87	0.97	-0.04
adam15				NC_041327.1	16	9921335	9967091	NC_006088.5	1	195670610	195685220	26.73	31.15	0.84	-0.25
tpbgl				NC_041315.1	4	6366149	6370031	NC_006088.5	1	195806397	195808663	20.15	21.99	0.9	-0.16
pgm2l1	NW_003339335.1	32350	100513	NC_041315.1	4	6527523	6569168	NC_006088.5	1	195813191	195850986	31.15	26.4	1.15	0.2
kcne3				NC_041315.1	4	6673059	6692401	NC_006088.5	1	195858570	195863712	34.11	21.85	1.52	0.61
pold3	NW_003339036.1	585218	619704					NC_006088.5	1	195879128	195910184	31.1	30.8	0.99	-0.02
chrdl2	NW_003339036.1	539569	564329	NC_041315.1	4	6881075	6931183	NC_006088.5	1	195926251	195964081	30.53	29.84	1	0
rnf169	NW_003339036.1	501529	519968	NC_041315.1	4	6957153	6979265	NC_006088.5	1	195964020	195987402	38.22	38.86	0.96	-0.06
spcs2	NW_003339036.1	431104	449720	NC_041315.1	4	7017070	7027139	NC_006088.5	1	196000701	196008838	29.49	21.14	1.36	0.45
neu3				NC_041315.1	4	7035442	7046878	NC_006088.5	1	196008362	196013053	40.52	38.25	1.03	0.05
ppme1				NC_041315.1	4	7148201	7191619	NC_006088.5	1	196023418	196053237	27.51	37.73	0.71	-0.49
c2cd3				NC_041315.1	4	7193450	7255108	NC_006088.5	1	196053371	196115976	26.54	27.79	0.93	-0.1
dnajb13	NW_003339680.1	41303	52761	NC_041315.1	4	7315981	7329103	NC_006088.5	1	196119550	196123957	30.64	30.75	0.97	-0.04
paaf1	NW_003339680.1	9759	35465	NC_041315.1	4	7331745	7349790	NC_006088.5	1	196124041	196138961	29.3	31.63	0.9	-0.14
mrpl48	NW_003339531.1	381	22132	NC_041315.1	4	7352956	7380010	NC_006088.5	1	196141731	196151565	32.39	31.19	1.01	0.02
rab6a	NW_003339531.1	92312	113988	NC_041315.1	4	7395752	7461096	NC_006088.5	1	196157062	196221090	30.17	33.25	0.89	-0.17
relt	NW_003338884.1	1261254	1273986	NC_041315.1	4	7739389	7783217	NC_006088.5	1	196383051	196396224	21.03	27.7	0.74	-0.43
p2ry6	NW_003338845.1	281463	360783	NC_041315.1	4	8079035	8132297	NC_006088.5	1	196443820	196444982	29.61	32.87	0.88	-0.18
fchsd2	NW_003338845.1	502194	682200	NC_041315.1	4	8286430	8433009	NC_006088.5	1	196494668	196623752	27.88	30.33	0.9	-0.16
serpinh1	NW_003338845.1	712884	732635	NC_041315.1	4	8436711	8451531	NC_006088.5	1	196648339	196655176	33.29	26.71	1.22	0.28
gdpd5	NW_003338845.1	898808	1058072	NC_041315.1	4	8592736	8636428	NC_006088.5	1	196687397	196845684	31.91	29.96	1.04	0.06
mogat2	NW_003338845.1	1197770	1246964	NC_041315.1	4	8760826	8845975	NC_006088.5	1	196939391	196957121	30.32	30.46	0.97	-0.04
dgat2	NW_003338845.1	1305850	1324067	NC_041315.1	4	8870709	8934939	NC_006088.5	1	196969914	196986056	38.65	39.05	0.97	-0.05
chrna10				NC_041315.1	4	4098426	4108966	NC_006088.5	1	197033423	197037102	30.7	31.61	0.95	-0.08
nup98	NW_003339447.1	198	80264	NC_041315.1	4	4051704	4095046	NC_006088.5	1	197038113	197076398	33.68	28.66	1.15	0.2
pgap2	NW_003339447.1	80502	115677	NC_041315.1	4	4035191	4051449	NC_006088.5	1	197077006	197090759	29.35	30.17	0.95	-0.07
rhog	NW_003339447.1	130271	132801	NC_041315.1	4	4000553	4029228	NC_006088.5	1	197092912	197097271	35.02	28.42	1.2	0.27
stim1	NW_003339240.1	4116	100497	NC_041315.1	4	3884927	3988180	NC_006088.5	1	197098421	197144903	27.47	25.17	1.07	0.09
rrm1	NW_003339240.1	159394	195562	NC_041315.1	4	3823724	3842508	NC_006088.5	1	197157405	197175421	30.95	26.6	1.14	0.18
rps11	NW_003339240.1	227828	234351					NC_006088.5	1	197371004	197373890	21.69	20.19	1.05	0.07
fam160a2				NC_041315.1	4	2230800	2262788	NC_006088.5	1	197379398	197386962	23.49	27.23	0.84	-0.25
cnga4				NC_041315.1	4	2213448	2226752	NC_006088.5	1	197387069	197391211	28.29	29.54	0.94	-0.1
cckbr				NC_041315.1	4	1525659	1536640	NC_006088.5	1	197392646	197395026	27.05	24.67	1.07	0.1
smpd1	NW_003340575.1	8571	14803	NC_041315.1	4	1461915	1473648	NC_006088.5	1	197398852	197402741	29.03	26.91	1.05	0.08
apbb1	NW_003340575.1	3857	6642	NC_041315.1	4	1435228	1460329	NC_006088.5	1	197402790	197408312	31.05	36.08	0.84	-0.25
hpx	NW_003343699.1	709	4068	NC_041315.1	4	1404666	1409932	NC_006088.5	1	197409247	197412887	32.26	31.88	0.99	-0.02
trim3	NW_003341643.1	2558	9407	NC_041315.1	4	1372441	1396029	NC_006088.5	1	197413239	197421223	27.97	26.88	1.02	0.02
arfip2	NW_003339500.1	85684	103115	NC_041315.1	4	1343422	1349829	NC_006088.5	1	197432696	197438849	22.38	32.14	0.68	-0.56
rrp8				NC_041315.1	4	1281339	1294591	NC_006088.5	1	197464301	197467711	23.53	26.33	0.87	-0.2
ilk	NW_003342003.1	1058	7995	NC_041315.1	4	1275165	1280987	NC_006088.5	1	197467877	197473316	32.06	28.08	1.12	0.16
taf10				NC_041315.1	4	1271311	1273145	NC_006088.5	1	197473784	197476083	29.3	25.9	1.11	0.14
tpp1	NW_003339756.1	2434	24884	NC_041315.1	4	1263315	1271112	NC_006088.5	1	197476189	197480661	25.41	21.83	1.14	0.19
dchs1	NW_003339756.1	34969	64830	NC_041315.1	4	1223428	1258558	NC_006088.5	1	197487500	197563691	31.07	27.96	1.09	0.12
lcmt2	NW_003340948.1	4668	14064	NC_041315.1	4	1196384	1212509	NC_006088.5	1	197563781	197584851	23.42	26.51	0.86	-0.21
smarcd3				NC_041323.1	12	974258	1014132	NC_006089.5	2	58534	147629	30.8	27.16	1.11	0.15
chpf2				NC_041323.1	12	960196	970638	NC_006089.5	2	154525	159355	33.64	31	1.06	0.08
abcf2				NC_041323.1	12	949419	960038	NC_006089.5	2	159572	170332	26	26.49	0.96	-0.06
asb10				NC_041323.1	12	916484	925057	NC_006089.5	2	185803	198308	34.26	30.67	1.09	0.13
agap3				NC_041323.1	12	800202	899961	NC_006089.5	2	218098	296725	32.91	29.88	1.08	0.11
tmub1	NW_003343975.1	183	6315	NC_041323.1	12	782024	786281	NC_006089.5	2	304395	306482	12.7	13.62	0.91	-0.13
fastk	NW_003340057.1	22209	26725	NC_041323.1	12	768938	780339	NC_006089.5	2	306708	316265	30.97	32.96	0.92	-0.12
slc4a2	NW_003340057.1	1296	21372	NC_041323.1	12	705170	768930	NC_006089.5	2	316268	327811	29.01	28.16	1.01	0.01
cdk5				NC_041323.1	12	587443	596544	NC_006089.5	2	328651	331191	31.26	27.87	1.1	0.13
abcb8				NC_041323.1	12	233363	244512	NC_006089.5	2	338106	344022	32.33	27.55	1.15	0.2
kcnh2	NW_003339354.1	122082	201215	NC_041323.1	12	328803	414726	NC_006089.5	2	370085	394348	36.61	29.98	1.19	0.25
aoc1	NW_003339354.1	221404	229700	NC_041323.1	12	420353	426982	NC_006089.5	2	394482	398235	32.09	21.3	1.47	0.56
rarres2	NW_003339337.1	25172	32942	NC_041323.1	12	2261846	2267623	NC_006089.5	2	457092	458880	28	26.23	1.04	0.06
lrrc61	NW_003339337.1	37655	39338	NC_041323.1	12	2255941	2257641	NC_006089.5	2	458715	461798	31	31.13	0.97	-0.04
sspo	NW_003339337.1	78652	189419	NC_041323.1	12	2040859	2181048	NC_006089.5	2	467007	503021	30.98	29.27	1.03	0.05
cdc25a	NW_003342058.1	242	10222	NC_041323.1	12	3707695	3721574	NC_006089.5	2	629830	644019	32.28	31.34	1.01	0.01
map4				NC_041323.1	12	3780688	3970467	NC_006089.5	2	657539	772708	30.49	28.22	1.06	0.08
dhx30	NW_003339167.1	192085	223113	NC_041323.1	12	2664920	2680559	NC_006089.5	2	772886	805121	33.47	31.96	1.02	0.03
smarcc1	NW_003339167.1	306550	417178	NC_041323.1	12	2745402	2841096	NC_006089.5	2	830791	898316	29.56	29.16	0.99	-0.01
cspg5				NC_041323.1	12	2847266	2874801	NC_006089.5	2	901382	910800	22.58	23.21	0.95	-0.07
elp6								NC_006089.5	2	914076	929143	34.35	27.21	1.23	0.3
scap	NW_003339539.1	34538	88186	NC_041323.1	12	2900361	2939465	NC_006089.5	2	930714	981287	29.75	27.73	1.05	0.07
ptpn23	NW_003339539.1	456	29972	NC_041323.1	12	2939922	3013557	NC_006089.5	2	981344	996632	30.5	30.1	0.99	-0.01
fam188b	6	1766398	1838810					NC_006089.5	2	1061932	1140793	30.42	29.63	1	0
sec22c	6	2599594	2623559	NC_041323.1	12	7225677	7238583	NC_006089.5	2	1979148	1998460	30.25	26.57	1.11	0.15
nktr	6	2642923	2674908	NC_041323.1	12	7179783	7220489	NC_006089.5	2	2020323	2060329	32.35	32.53	0.97	-0.04
zbtb47	6	2678617	2713229	NC_041323.1	12	7128691	7167938	NC_006089.5	2	2070866	2090875	27.22	28.37	0.94	-0.09
klhl40	6	2720936	2733558	NC_041323.1	12	7107602	7119484	NC_006089.5	2	2092193	2102704	29.59	32.63	0.89	-0.17
hhatl	6	2742956	2767804	NC_041323.1	12	7067640	7098809	NC_006089.5	2	2106160	2125850	36.41	29.5	1.21	0.27
ccdc13	6	2779984	2799725	NC_041323.1	12	3372398	3405649	NC_006089.5	2	2122524	2155671	31.91	30.64	1.02	0.02
higd1a	NW_003338879.1	1380636	1393136					NC_006089.5	2	2154712	2159678	29.85	30.9	0.94	-0.08
obscn	6	2933386	3131805	NC_041323.1	12	6702388	6906128	NC_006089.5	2	2172891	2353488	33.39	32.21	1.01	0.02
iba57	6	3159119	3163079	NC_041323.1	12	6616193	6625634	NC_006089.5	2	2388030	2392484	31.99	29.68	1.05	0.07
gjc2	6	3165043	3224568					NC_006089.5	2	2394461	2440924	29.51	36.98	0.78	-0.36
guk1	6	3239097	3257110	NC_041323.1	12	6441554	6487717	NC_006089.5	2	2426957	2440924	28.16	34.3	0.8	-0.32
mrpl55	6	3257205	3262328					NC_006089.5	2	2441007	2443404	32.62	32.97	0.97	-0.05
arf1	6	3285931	3306119	NC_041323.1	12	6380551	6399504	NC_006089.5	2	2449665	2461652	25.58	26.2	0.95	-0.07
wnt9a	NW_003339400.1	111501	128893	NC_041323.1	12	6054713	6113735	NC_006089.5	2	2666082	2717022	30.68	28.02	1.07	0.1
snap47	NW_003338996.1	447787	483870	NC_041323.1	12	5578940	5607230	NC_006089.5	2	3277464	3303728	31.79	27.32	1.14	0.18
jmjd4	NW_003338996.1	429876	447725	NC_041323.1	12	5568703	5578798	NC_006089.5	2	3303811	3312928	30.79	31.32	0.96	-0.06
pth1r	NW_003339234.1	174154	229487	NC_041323.1	12	5094187	5224335	NC_006089.5	2	3652705	3758795	34.15	31.93	1.04	0.06
ccdc12	NW_003339234.1	35250	59348	NC_041323.1	12	4840305	4874851	NC_006089.5	2	3896887	3930379	27.51	32.77	0.82	-0.29
nbeal2				NC_041323.1	12	4626708	4823351	NC_006089.5	2	3930814	3957534	34.15	29.85	1.12	0.16
setd2	NW_003339466.1	10153	112373	NC_041323.1	12	4392173	4482315	NC_006089.5	2	3969179	4023444	34.43	30.94	1.09	0.12
kif9	NW_003339412.1	145644	171663	NC_041323.1	12	4243126	4282415	NC_006089.5	2	4025273	4048258	30.26	28.44	1.04	0.06
klhl18	NW_003339412.1	109877	143392	NC_041323.1	12	4195362	4236802	NC_006089.5	2	4048292	4069915	31.56	29.06	1.06	0.09
tbrg4	NW_003339670.1	1427	30362	NC_041323.1	12	3247470	3277787	NC_006089.5	2	4081290	4090677	34.29	33.1	1.01	0.02
ccm2	NW_003339907.1	17977	40417					NC_006089.5	2	4100172	4126164	31.56	31	0.99	-0.01
gars	6	1391300	1409339	NC_041323.1	12	8574434	8602673	NC_006089.5	2	4427801	4450143	31.79	32.71	0.95	-0.07
ctdspl	6	1189417	1219518	NC_041323.1	12	8723626	8789856	NC_006089.5	2	4568816	4640232	33.49	30.79	1.06	0.09
dlec1	6	1023122	1063398	NC_041323.1	12	8923051	8973286	NC_006089.5	2	4751374	4788885	31.28	29.96	1.02	0.03
acaa1	6	1012866	1025819	NC_041323.1	12	8973408	8990331	NC_006089.5	2	4788891	4796965	32.11	27.97	1.12	0.17
myd88	6	882458	890959	NC_041323.1	12	9144488	9158948	NC_006089.5	2	4892500	4905115	31.74	35.63	0.87	-0.2
oxsr1	6	785780	870694	NC_041323.1	12	9177380	9262015	NC_006089.5	2	4915790	5007664	33.07	29.9	1.08	0.11
csrnp1	6	413601	454164	NC_041323.1	12	9775990	9812707	NC_006089.5	2	5314874	5328336	28.69	31	0.9	-0.15
gorasp1	6	354510	369748	NC_041323.1	12	9872832	9891528	NC_006089.5	2	5347141	5353927	43.88	42.4	1.01	0.02
wdr48	6	326394	352427	NC_041323.1	12	9893646	9928569	NC_006089.5	2	5355491	5379083	32.41	32.29	0.98	-0.03
exog	NW_003339077.1	275219	302705	NC_041323.1	12	10457339	10484237	NC_006089.5	2	5774902	5805669	32.69	35.29	0.9	-0.14
acvr2b	NW_003339077.1	318903	352159	NC_041323.1	12	10498519	10636359	NC_006089.5	2	5811828	5901825	34.39	34.21	0.98	-0.03
xylb	6	3730589	3834364	NC_041323.1	12	10891099	11011927	NC_006089.5	2	6125042	6256021	35.67	32.33	1.08	0.11
nub1	6	3842841	3863090	NC_041323.1	12	11025593	11049358	NC_006089.5	2	6273854	6290629	31.16	31.22	0.97	-0.04
wdr86	6	3865699	3916199	NC_041323.1	12	11054459	11087390	NC_006089.5	2	6292135	6311275	32.61	36.48	0.87	-0.2
rheb	6	3958037	3971885	NC_041323.1	12	11111451	11143134	NC_006089.5	2	6331550	6362989	39.03	34.13	1.12	0.16
prkag2	6	3989868	4205650	NC_041323.1	12	11148803	11355657	NC_006089.5	2	6368753	6550794	32.97	29.38	1.1	0.13
galnt11	6	4229993	4254877	NC_041323.1	12	11376566	11406754	NC_006089.5	2	6578345	6620874	32.92	32.49	0.99	-0.01
kmt2c	6	4257594	4463624	NC_041323.1	12	11405405	11548307	NC_006089.5	2	6620024	6808024	33.18	33.55	0.97	-0.05
xrcc2	6	4502452	4511885	NC_041323.1	12	11572591	11584100	NC_006089.5	2	6837267	6857325	34.53	31.56	1.07	0.1
dpp6	6	5238227	5419217	NC_041323.1	12	11922433	12469944	NC_006089.5	2	7233214	7720910	31.79	31.74	0.98	-0.03
paxip1	6	5435820	5460362	NC_041323.1	12	12489640	12516436	NC_006089.5	2	7743776	7779201	31.15	29.37	1.04	0.05
htr5a	6	5478969	5490977	NC_041323.1	12	12538356	12548512	NC_006089.5	2	7796832	7800301	30.15	25.95	1.13	0.18
insig1	6	5580340	5593166	NC_041323.1	12	12644005	12657634	NC_006089.5	2	7910231	7918978	29.13	29.43	0.97	-0.05
en2	6	5704675	5712917	NC_041323.1	12	12720890	12728335	NC_006089.5	2	7961555	7963672	27.07	28.37	0.93	-0.1
rbm33	6	5834844	5914877	NC_041323.1	12	12874811	12965687	NC_006089.5	2	8053758	8146915	29.26	28.97	0.99	-0.02
shh	6	5935960	5968719	NC_041323.1	12	12982167	13014695	NC_006089.5	2	8166226	8175850	44.17	34.61	1.25	0.32
rnf32	6	6278263	6299132	NC_041323.1	12	13337824	13358228	NC_006089.5	2	8499996	8516977	37.42	37.21	0.98	-0.03
lmbr1	6	6299072	6344889	NC_041323.1	12	13360112	13423051	NC_006089.5	2	8520589	8580724	31.57	33.12	0.93	-0.1
nom1	6	6371335	6385066	NC_041323.1	12	13443443	13459713	NC_006089.5	2	8600315	8615716	33.78	31.45	1.05	0.07
ube3c	6	6464402	6516686	NC_041323.1	12	13536638	13598495	NC_006089.5	2	8668155	8732646	32.4	32.62	0.97	-0.04
dnajb6	6	6533266	6594971	NC_041323.1	12	13602787	13675176	NC_006089.5	2	8738313	8788235	32.39	32.86	0.96	-0.05
ptprn2	6	6739213	7190395	NC_041323.1	12	13783863	14469944	NC_006089.5	2	8870166	9492875	37.91	35.69	1.04	0.05
ncapg2	6	7301854	7329095	NC_041323.1	12	14484333	14523017	NC_006089.5	2	9507031	9543428	34.72	34.46	0.98	-0.02
esyt2	NW_003339646.1	15705	78337	NC_041323.1	12	14530515	14600698	NC_006089.5	2	9550963	9621255	34.44	35.15	0.96	-0.06
wdr60	6	7331099	7356821	NC_041323.1	12	14608824	14636551	NC_006089.5	2	9626766	9653044	33.04	29.44	1.1	0.13
vipr2	6	7384282	7436378	NC_041323.1	12	14666629	14726219	NC_006089.5	2	9699019	9749765	34.56	29.31	1.15	0.2
zmynd11	6	7515385	7610858	NC_041323.1	12	14812458	14915726	NC_006089.5	2	9877644	9980522	32.96	31.09	1.04	0.05
larp4b	6	7997649	8058258	NC_041323.1	12	15271968	15333155	NC_006089.5	2	10331483	10385003	32.46	31.6	1	0
gtpbp4	6	8095894	8110894	NC_041323.1	12	15352326	15381300	NC_006089.5	2	10442186	10453089	31.34	30.63	1	0
wdr37	6	8117811	8170806	NC_041323.1	12	15401990	15451473	NC_006089.5	2	10464000	10502390	29.91	31.15	0.94	-0.09
adarb2	6	8200359	8579874	NC_041323.1	12	15476651	15848422	NC_006089.5	2	10524695	10822457	34	31.25	1.06	0.09
pfkp	6	9232635	9303313	NC_041323.1	12	16484125	16543239	NC_006089.5	2	11439905	11481490	33.32	31.97	1.02	0.03
pitrm1	6	9303576	9331291	NC_041323.1	12	16544134	16573371	NC_006089.5	2	11482052	11507235	33.67	32.71	1.01	0.01
klf6	6	9649973	9662106	NC_041323.1	12	16908549	16921511	NC_006089.5	2	11821968	11830930	31.49	34.88	0.88	-0.18
fzd8	6	10677929	10681392	NC_041323.1	12	17916529	17919328	NC_006089.5	2	12842879	12846039	32.67	28.13	1.13	0.18
crem	6	10821216	10854481	NC_041323.1	12	18068196	18098303	NC_006089.5	2	13013159	13049065	32.9	27.79	1.16	0.21
cul2	6	10864576	10898963	NC_041323.1	12	18105255	18153581	NC_006089.5	2	13054712	13101033	31.3	34.05	0.9	-0.16
pard3	6	11025353	11523805	NC_041323.1	12	18191652	18765404	NC_006089.5	2	13147839	13582327	34	31.6	1.05	0.07
nrp1	6	12049224	12209328	NC_041323.1	12	19177232	19303698	NC_006089.5	2	13897619	14006927	32.01	32.33	0.97	-0.05
itgb1	6	12274824	12323885	NC_041323.1	12	19399929	19433043	NC_006089.5	2	14057653	14099289	33.09	33.62	0.96	-0.06
epc1	6	12469341	12532141	NC_041323.1	12	19636072	19691327	NC_006089.5	2	14123576	14182573	34.39	35.57	0.94	-0.08
kif5b	6	12562043	12595598	NC_041323.1	12	19715513	19755114	NC_006089.5	2	14216681	14250579	34.46	33.97	0.99	-0.01
arhgap12	6	12645347	12708204	NC_041323.1	12	19802405	19867882	NC_006089.5	2	14270958	14342139	32.55	34	0.94	-0.1
zeb1	6	12786565	12908263	NC_041323.1	12	19930498	19983831	NC_006089.5	2	14388427	14494371	31.97	32.38	0.96	-0.05
svil	6	13106917	13260904	NC_041323.1	12	20190100	20280509	NC_006089.5	2	14680448	14814583	31.51	30.58	1.01	0.01
kiaa1462	6	13342775	13413763					NC_006089.5	2	14902012	14959522	19.96	21.39	0.91	-0.13
mtpap	6	13460726	13475157	NC_041323.1	12	20527130	20533301	NC_006089.5	2	14989578	15011655	33.04	31.73	1.02	0.02
map3k8	6	13481101	13510611	NC_041323.1	12	20545339	20569289	NC_006089.5	2	15014395	15032491	29.07	29.13	0.97	-0.04
bambi	6	13785582	13801682	NC_041323.1	12	20849967	20860570	NC_006089.5	2	15314196	15318463	34.74	31.48	1.08	0.11
wac	6	13819929	13874012	NC_041323.1	12	20891454	20936394	NC_006089.5	2	15338544	15396145	35.06	33.18	1.03	0.05
ssna1	6	13881273	13885657	NC_041323.1	12	20936510	20940991	NC_006089.5	2	15397367	15399485	32.91	30.94	1.04	0.06
mpp7	6	13944470	14028840	NC_041323.1	12	20975586	21061119	NC_006089.5	2	15436766	15580424	35.99	35.43	0.99	-0.01
mkx	6	14173060	14237099	NC_041323.1	12	21221129	21281116	NC_006089.5	2	15687208	15731021	34.93	34.09	1	0
rab18	5	670924	686338	NC_041323.1	12	21354440	21367319	NC_006089.5	2	15786145	15799223	33.67	32.38	1.02	0.02
ptchd3	6	14351515	14359606					NC_006089.5	2	15909586	15920455	32.36	32.04	0.99	-0.02
yme1l1	6	14470242	14491867					NC_006089.5	2	15924134	15944225	28.48	31.6	0.88	-0.18
mastl	6	14492902	14511736	NC_041323.1	12	21686442	21710488	NC_006089.5	2	15947040	15964490	31.83	33.64	0.92	-0.11
acbd5	6	14513099	14537668	NC_041323.1	12	21705986	21736625	NC_006089.5	2	15965513	15992749	31.37	35.29	0.87	-0.2
abi1	6	14588665	14658017	NC_041323.1	12	21750537	21845100	NC_006089.5	2	16014525	16094754	33.1	30.39	1.06	0.09
pdss1	6	14657807	14672096	NC_041323.1	12	21845192	21863562	NC_006089.5	2	16093455	16116800	34.32	31.14	1.08	0.11
apbb1ip	6	14709520	14758290	NC_041323.1	12	21890395	21948428	NC_006089.5	2	16143797	16201613	30.35	33.5	0.88	-0.18
gad2	6	14801678	14843880	NC_041323.1	12	21994408	22030912	NC_006089.5	2	16266376	16299256	32.28	30.99	1.02	0.03
myo3a	6	14850301	14949619	NC_041323.1	12	22035529	22145895	NC_006089.5	2	16300354	16404565	34.39	31.76	1.06	0.08
gpr158	6	15030313	15163394	NC_041323.1	12	22204610	22327158	NC_006089.5	2	16494334	16674486	30.24	24.75	1.19	0.26
thnsl1	6	15197522	15204694	NC_041323.1	12	22356183	22364807	NC_006089.5	2	16720751	16731084	34.89	34.54	0.99	-0.02
enkur	6	15204785	15213588	NC_041323.1	12	22364894	22374079	NC_006089.5	2	16731138	16740294	37.33	29.77	1.22	0.29
prtfdc1	6	15219466	15263940	NC_041323.1	12	22379272	22430008	NC_006089.5	2	16749479	16797005	30.87	36.89	0.82	-0.29
arhgap21	6	15288098	15420210	NC_041323.1	12	22457668	22568253	NC_006089.5	2	16795056	16932053	33.32	29.5	1.1	0.14
kiaa1217	6	15426297	15814339	NC_041323.1	12	22573194	22942172	NC_006089.5	2	16933939	17284925	33.14	31.25	1.04	0.05
otud1	6	15869384	15872009	NC_041323.1	12	22993192	22995799	NC_006089.5	2	17354853	17357310	23.82	20.94	1.11	0.15
ptf1a	6	15956702	15960290	NC_041323.1	12	23064260	23066887	NC_006089.5	2	17416151	17417467	24.78	22.11	1.09	0.13
armc3	6	16028930	16111323	NC_041323.1	12	23104155	23160975	NC_006089.5	2	17448620	17506436	31.85	32.38	0.96	-0.06
pip4k2a	6	16137685	16212710	NC_041323.1	12	23191649	23256479	NC_006089.5	2	17543261	17645207	44.91	42.8	1.03	0.04
spag6	6	16248472	16317199	NC_041323.1	12	23312068	23361654	NC_006089.5	2	17682386	17731271	30.88	33	0.91	-0.13
bmi1				NC_041323.1	12	23385070	23395646	NC_006089.5	2	17733159	17747723	31.26	27.49	1.11	0.15
dnajc1	6	16471224	16559519	NC_041323.1	12	23460800	23577303	NC_006089.5	2	17823830	17917737	31.07	32.09	0.95	-0.08
mllt10	6	16563737	16709166	NC_041323.1	12	23577712	23703702	NC_006089.5	2	17919865	18038338	33.44	33.63	0.97	-0.04
skida1	6	16715647	16721748					NC_006089.5	2	18042852	18052817	22.29	19.59	1.11	0.15
nebl	6	16798074	16932634	NC_041323.1	12	23761131	23892182	NC_006089.5	2	18124289	18371628	32.63	35.25	0.9	-0.15
plxdc2	6	17060162	17277637	NC_041323.1	12	24033981	24267325	NC_006089.5	2	18524423	18759179	28.43	29.38	0.95	-0.08
malrd1	6	17306152	17527994	NC_041323.1	12	24286876	24527613	NC_006089.5	2	18779711	18995157	31.96	31.63	0.99	-0.02
arl5b	6	17684592	17699091	NC_041323.1	12	24621258	24633278	NC_006089.5	2	19078341	19094395	34.07	30.93	1.08	0.11
nsun6	6	17702885	17727118	NC_041323.1	12	24633426	24661183	NC_006089.5	2	19094534	19114348	30.9	33.3	0.91	-0.14
cacnb2	6	17731690	17898707	NC_041323.1	12	24666409	24798169	NC_006089.5	2	19115996	19343809	32.65	32.79	0.97	-0.04
slc39a12	6	17921965	17959804	NC_041323.1	12	24812316	24827853	NC_006089.5	2	19368566	19405489	32.96	27.16	1.19	0.25
mrc1								NC_006089.5	2	19573334	19621981	32.17	34.45	0.91	-0.13
stam	6	18125840	18143071	NC_041323.1	12	25171503	25199512	NC_006089.5	2	19638448	19672963	33.07	29.63	1.09	0.12
hacd1	6	18161723	18175953	NC_041323.1	12	25199094	25221158	NC_006089.5	2	19682110	19699098	32.13	32.61	0.96	-0.06
st8sia6	6	18217719	18270871	NC_041323.1	12	25255677	25297961	NC_006089.5	2	19733418	19766338	38.3	31.83	1.18	0.23
vim	6	18298646	18317361	NC_041323.1	12	25312496	25326320	NC_006089.5	2	19795145	19802856	32.98	28.49	1.13	0.18
trdmt1	6	18339946	18366683					NC_006089.5	2	19802064	19845989	28.66	29.42	0.95	-0.07
cubn	6	18373406	18519069	NC_041323.1	12	25368571	25495272	NC_006089.5	2	19855404	19994610	33.66	31.82	1.03	0.05
rsu1	6	18523623	18613644	NC_041323.1	12	25498705	25565388	NC_006089.5	2	19997121	20097307	33.34	31.43	1.04	0.05
c1ql3	6	18676666	18692616	NC_041323.1	12	25589708	25599217	NC_006089.5	2	20119892	20127297	23.89	25.23	0.92	-0.11
pter	6	18695506	18720435	NC_041323.1	12	25602433	25629578	NC_006089.5	2	20127429	20148700	31.57	28.85	1.07	0.1
fam188a	6	18858557	18891455					NC_006089.5	2	20283144	20330247	38.73	38.11	0.99	-0.01
itga8	6	18898898	19030762	NC_041323.1	12	25828725	25971226	NC_006089.5	2	20336159	20437301	32.64	31.48	1.01	0.02
fam171a1	6	19132911	19180831	NC_041323.1	12	26030100	26100940	NC_006089.5	2	20492301	20576295	27.75	32.09	0.84	-0.24
nmt2	6	19205920	19228558	NC_041323.1	12	26107071	26136417	NC_006089.5	2	20586010	20616616	30.64	33.28	0.9	-0.15
rpp38	6	19233228	19234214	NC_041323.1	12	26137086	26141324	NC_006089.5	2	20616523	20619955	33.37	29.88	1.09	0.13
acbd7	6	19239675	19247975	NC_041323.1	12	26146157	26153786	NC_006089.5	2	20620092	20629145	32.38	30.79	1.03	0.04
crot	6	19262699	19284681	NC_041323.1	12	26161404	26187962	NC_006089.5	2	20644335	20664076	35.14	29.83	1.15	0.2
rundc3b	6	19355463	19394192	NC_041323.1	12	26260153	26291546	NC_006089.5	2	20767116	20812730	31.27	33.2	0.92	-0.12
slc25a40	6	19394285	19410143	NC_041323.1	12	26293801	26306769	NC_006089.5	2	20812599	20826913	34.66	32.44	1.04	0.06
dbf4	6	19413890	19424340	NC_041323.1	12	26306868	26325082	NC_006089.5	2	20828341	20845668	29.46	29.37	0.98	-0.03
adam22	6	19428929	19577157	NC_041323.1	12	26329096	26459263	NC_006089.5	2	20849792	20980998	33.1	35.98	0.9	-0.15
sri	4	120008898	120021972	NC_041323.1	12	3429017	3455436	NC_006089.5	2	20983476	20992017	26.88	29.18	0.9	-0.15
steap4	6	19611361	19639709	NC_041323.1	12	26462174	26482161	NC_006089.5	2	21007319	21043063	30.14	26.56	1.11	0.15
znf804b	6	19791687	20064553					NC_006089.5	2	21353391	21386109	31.44	30.72	1	0
steap1	6	20282997	20302850	NC_041323.1	12	27027027	27036852	NC_006089.5	2	21641329	21651293	30.94	24.54	1.23	0.3
steap2	6	20313658	20333109	NC_041323.1	12	27044799	27065967	NC_006089.5	2	21661562	21678142	31.02	28.09	1.08	0.11
cfap69	6	20336015	20364439	NC_041323.1	12	27072556	27100291	NC_006089.5	2	21682554	21707838	34.2	33.8	0.99	-0.02
gtpbp10	6	20395520	20407173	NC_041323.1	12	27126711	27141299	NC_006089.5	2	21718839	21731540	31.46	33.29	0.92	-0.12
cldn12	6	20409602	20423071	NC_041323.1	12	27142750	27148739	NC_006089.5	2	21718847	21739244	31.24	37.37	0.82	-0.29
pttg1ip	3	33886527	33908430	NC_041316.1	5	61451124	61464560	NC_006089.5	2	21749405	21771949	32.52	36.62	0.87	-0.21
cdk14	6	20475095	20721286	NC_041323.1	12	27183967	27412273	NC_006089.5	2	21788223	22101086	30.95	33.36	0.91	-0.14
fzd1	6	20754833	20758939	NC_041323.1	12	27433191	27437626	NC_006089.5	2	22134758	22137079	31.75	24.05	1.29	0.37
akap9	6	20976170	21082860	NC_041323.1	12	27645108	27748926	NC_006089.5	2	22394327	22493502	33.21	31.47	1.03	0.04
krit1	6	21116611	21136150	NC_041323.1	12	27772080	27791548	NC_006089.5	2	22512900	22533249	35.87	33.74	1.04	0.05
ankib1	6	21136170	21194244	NC_041323.1	12	27792127	27846951	NC_006089.5	2	22532847	22617417	34.48	31.99	1.05	0.07
gatad1	6	21221967	21230442	NC_041323.1	12	27869856	27875776	NC_006089.5	2	22622554	22625627	31.43	27.44	1.12	0.16
pex1	6	21261651	21284260	NC_041323.1	12	27932382	27954500	NC_006089.5	2	22652717	22674966	34.24	32.67	1.02	0.03
rbm48	6	21284515	21291110	NC_041323.1	12	27954683	27959920	NC_006089.5	2	22675195	22680507	40.58	27.45	1.44	0.53
efcab1	6	21291252	21299307	NC_041323.1	12	27960106	27968048	NC_006089.5	2	22678101	22684109	29.8	27.79	1.05	0.07
fam133b	6	21300634	21313788	NC_041323.1	12	27969778	27984108	NC_006089.5	2	22684318	22700704	34.25	36.34	0.92	-0.12
cdk6	6	21323564	21460089	NC_041323.1	12	27988496	28100040	NC_006089.5	2	22703452	22835554	35.52	30.3	1.15	0.2
vps50	6	21588975	21658642					NC_006089.5	2	22950158	23019350	33.31	34.15	0.95	-0.07
calcr	6	21687935	21828860	NC_041323.1	12	28345745	28490345	NC_006089.5	2	23055265	23197833	35.73	32.5	1.07	0.1
tfpi2	6	21938727	21948423					NC_006089.5	2	23301638	23307375	27.92	38.54	0.71	-0.5
bet1	6	22015809	22025911	NC_041323.1	12	28678527	28693544	NC_006089.5	2	23397175	23403089	30.18	29.37	1	0.01
col1a2	6	22171027	22230100	NC_041323.1	12	28792225	28859580	NC_006089.5	2	23572787	23611758	33.77	33.28	0.99	-0.01
casd1	6	22243241	22276814	NC_041323.1	12	28871115	28901360	NC_006089.5	2	23621602	23647455	34.96	35.6	0.96	-0.06
sgce	6	22277321	22308767	NC_041323.1	12	28902026	28929060	NC_006089.5	2	23650642	23678203	34.73	31.91	1.06	0.09
ppp1r9a	6	22333544	22501951	NC_041323.1	12	28947240	29094019	NC_006089.5	2	23715250	23851627	33.11	34.44	0.94	-0.09
pon2	6	22506823	22522686					NC_006089.5	2	23847295	23867263	54.25	58.03	0.91	-0.13
pdk4	6	22568830	22580425	NC_041323.1	12	29149276	29160583	NC_006089.5	2	23874761	23914452	36.86	35.36	1.02	0.03
asb4	6	22537041	22547275					NC_006089.5	2	23881940	23891372	33.54	33.26	0.99	-0.02
dync1i1	6	22623161	22830786	NC_041323.1	12	29181690	29386051	NC_006089.5	2	23942084	24123400	33.84	33.71	0.98	-0.03
slc25a13	6	22834459	22959333	NC_041323.1	12	29388657	29529594	NC_006089.5	2	24127768	24221691	31.85	31.16	1	0
dlx6	6	23237471	23243809	NC_041323.1	12	29730055	29736444	NC_006089.5	2	24442918	24446535	33.65	31.77	1.03	0.05
dlx5	6	23266555	23277521	NC_041323.1	12	29747546	29752712	NC_006089.5	2	24451493	24453750	24.97	31.72	0.77	-0.38
sdhaf3	6	23306090	23343181	NC_041323.1	12	29807287	29831908	NC_006089.5	2	24478719	24505947	35.49	33.49	1.04	0.05
tac1	6	23494120	23519706	NC_041323.1	12	29954628	29975749	NC_006089.5	2	24644607	24650418	31.53	32.77	0.94	-0.09
asns	6	23533781	23548894	NC_041323.1	12	29990155	30006249	NC_006089.5	2	24662428	24676238	32.91	34.16	0.94	-0.09
c1galt1	6	23562276	23573463	NC_041323.1	12	30012085	30024990	NC_006089.5	2	24688334	24702578	29.24	27.37	1.04	0.06
col28a1	6	23588080	23657540	NC_041323.1	12	30029446	30094047	NC_006089.5	2	24708471	24769680	31.19	28.48	1.07	0.1
mios	6	23665949	23682481	NC_041323.1	12	30107899	30123006	NC_006089.5	2	24774047	24788804	33.63	31.8	1.03	0.05
rpa3	6	23579956	23585265	NC_041323.1	12	30123316	30127183	NC_006089.5	2	24790715	24794022	25.77	29.53	0.85	-0.23
umad1	6	23686705	23721470	NC_041323.1	12	30127290	30167459	NC_006089.5	2	24794019	24862536	27.47	31.45	0.85	-0.23
glcci1	6	23744948	23798828	NC_041323.1	12	30187741	30229011	NC_006089.5	2	24891270	24943692	34.63	31.48	1.07	0.1
ica1	6	23805177	23873217	NC_041323.1	12	30239082	30305826	NC_006089.5	2	24952229	25024584	31.33	32.64	0.94	-0.09
nxph1	6	23949714	24140539	NC_041323.1	12	30363444	30533793	NC_006089.5	2	25087324	25223320	35.42	28.09	1.23	0.3
ndufa4				NC_041323.1	12	3515677	3526197	NC_006089.5	2	26015139	26018867	48.81	44.05	1.08	0.11
phf14	6	25016907	25159458	NC_041323.1	12	31293005	31424341	NC_006089.5	2	26038667	26194334	31.94	32.39	0.96	-0.05
thsd7a	6	25218339	25549522	NC_041323.1	12	31473007	31734713	NC_006089.5	2	26258252	26528121	34.42	32.94	1.02	0.03
tmem106b	6	25607304	25630404	NC_041323.1	12	31773716	31798824	NC_006089.5	2	26570971	26588987	31.25	29.96	1.02	0.03
vwde	6	25678023	25727288	NC_041323.1	12	31865441	31910626	NC_006089.5	2	26630218	26675608	31.93	32.32	0.97	-0.05
scin	6	25776879	25842873	NC_041323.1	12	31963569	32011750	NC_006089.5	2	26738375	26787923	30.96	33.52	0.9	-0.15
arl4a	6	25852563	25856852	NC_041323.1	12	32018889	32022676	NC_006089.5	2	26785439	26803358	38.57	37.81	1	-0.01
etv1	6	26364728	26468653	NC_041323.1	12	32478502	32571827	NC_006089.5	2	27266295	27337471	31.62	30.38	1.02	0.02
dgkb	6	26501983	26813599	NC_041323.1	12	32615469	32849639	NC_006089.5	2	27385984	27721471	35.85	31.74	1.1	0.14
ispd	6	27319536	27374815					NC_006089.5	2	28274782	28389660	34.84	32.86	1.04	0.05
sostdc1	6	27391558	27396266	NC_041323.1	12	33465724	33471068	NC_006089.5	2	28399440	28403563	31.97	33.69	0.93	-0.11
lrrc72				NC_041323.1	12	33523300	33544858	NC_006089.5	2	28435010	28452652	34.82	30.84	1.1	0.14
ankmy2	6	27458322	27482913	NC_041323.1	12	33546767	33563461	NC_006089.5	2	28455012	28475976	32.52	28.61	1.11	0.15
bzw2	6	27483103	27532474	NC_041323.1	12	33563795	33608249	NC_006089.5	2	28475866	28528179	35.36	32.32	1.07	0.1
tspan13	6	27554769	27575708	NC_041323.1	12	33629298	33646702	NC_006089.5	2	28543307	28560140	30.12	27.14	1.08	0.12
agr2	6	27579310	27599878	NC_041323.1	12	33652106	33662786	NC_006089.5	2	28562924	28566949	30.63	33.67	0.89	-0.17
agr3	6	27606621	27620965	NC_041323.1	12	33680686	33691525	NC_006089.5	2	28589343	28601141	30.56	35.62	0.84	-0.25
ahr	6	27753726	27823749	NC_041323.1	12	33879468	33927467	NC_006089.5	2	28753779	28814243	30.58	31.9	0.94	-0.09
snx13	6	27926079	28005571	NC_041323.1	12	34017698	34084773	NC_006089.5	2	28962238	29056420	32.39	31.97	0.99	-0.01
hdac9	6	28074715	28465772	NC_041323.1	12	34085038	34561252	NC_006089.5	2	29076506	29525063	30.09	30.12	0.98	-0.04
ferd3l	6	28677681	28679547	NC_041323.1	12	34637717	34640904	NC_006089.5	2	29582759	29584279	27.65	20.13	1.34	0.42
twistnb	6	28881108	28886769	NC_041323.1	12	34813124	34818921	NC_006089.5	2	29750691	29753965	24.93	30.31	0.8	-0.32
tmem196	6	28908338	28929250	NC_041323.1	12	34835596	34860682	NC_006089.5	2	29771896	29788844	28.54	34.55	0.81	-0.31
macc1	6	29082795	29125283	NC_041323.1	12	34934753	34965867	NC_006089.5	2	29898546	29934015	31.95	29.74	1.05	0.07
itgb8	6	29205801	29260584	NC_041323.1	12	35005467	35072185	NC_006089.5	2	29980833	30043352	29.43	31.49	0.91	-0.13
abcb5	6	29308595	29374743	NC_041323.1	12	35082215	35132411	NC_006089.5	2	30046438	30103663	32.8	32.68	0.98	-0.03
sp4	6	29757495	29776770	NC_041323.1	12	35437553	35459436	NC_006089.5	2	30404975	30430871	33.33	31.17	1.04	0.06
cdca7l	6	29973096	29995714	NC_041323.1	12	35606959	35630097	NC_006089.5	2	30557467	30596162	35.4	33.29	1.04	0.05
rapgef5	6	30068780	30221535	NC_041323.1	12	35689250	35816415	NC_006089.5	2	30624911	30776873	34.04	32.11	1.04	0.05
il6	6	30304240	30312276	NC_041323.1	12	35882559	35887482	NC_006089.5	2	30862822	30873241	29.09	34.99	0.81	-0.3
tomm7	6	30312634	30321751	NC_041323.1	12	35891181	35897186	NC_006089.5	2	30874339	30878365	19.98	29.68	0.66	-0.6
fam126a	6	30337335	30379964	NC_041323.1	12	35917713	35949442	NC_006089.5	2	30895602	30933264	28.92	29.58	0.96	-0.07
klhl7	6	30404007	30423805	NC_041323.1	12	35974020	35992930	NC_006089.5	2	30953069	30977413	29.14	35.81	0.79	-0.33
nupl2	6	30426994	30435586					NC_006089.5	2	30977891	30984343	34.15	30.66	1.09	0.12
gpnmb	6	30459500	30486302	NC_041323.1	12	36016390	36043667	NC_006089.5	2	31127744	31144996	34.28	30.28	1.11	0.15
malsu1	6	30496009	30502334	NC_041323.1	12	36046282	36053984	NC_006089.5	2	31145506	31155325	31.21	27.35	1.11	0.16
igf2bp3	6	30504023	30589107	NC_041323.1	12	36056979	36133995	NC_006089.5	2	31154362	31261778	30.74	32.64	0.92	-0.12
tra2a	6	30627025	30643292	NC_041323.1	12	36158293	36178882	NC_006089.5	2	31280845	31304603	36.22	34.06	1.04	0.05
ccdc126	6	30652820	30656216	NC_041323.1	12	36181509	36187489	NC_006089.5	2	31310230	31322676	33.78	49.39	0.67	-0.58
fam221a	6	30657292	30668975	NC_041323.1	12	36190512	36200296	NC_006089.5	2	31310268	31335766	41.39	33.54	1.21	0.27
stk31	6	30672285	30721492	NC_041323.1	12	36202433	36236274	NC_006089.5	2	31337931	31376337	33.54	32.75	1	0
npy	6	30849913	30870006	NC_041323.1	12	36352126	36367511	NC_006089.5	2	31464139	31472048	38.07	34.5	1.08	0.11
mpp6	6	31032728	31090369	NC_041323.1	12	36490978	36525384	NC_006089.5	2	31547919	31603914	32.24	31.16	1.01	0.02
dfna5	6	31093904	31131407					NC_006089.5	2	31606776	31631675	33.48	35.82	0.91	-0.13
osbpl3	6	31169949	31303624	NC_041323.1	12	36580318	36687848	NC_006089.5	2	31641120	31733269	33.77	32.62	1.01	0.02
npvf	6	31362155	31369091	NC_041323.1	12	36748291	36751462	NC_006089.5	2	31800647	31804213	35.43	29.88	1.16	0.21
hnrnpa2b1	6	31851293	31864537	NC_041323.1	12	37194541	37208772	NC_006089.5	2	32180024	32194955	36.65	30.53	1.17	0.23
cbx3	6	31864470	31876719	NC_041323.1	12	37208926	37221505	NC_006089.5	2	32194302	32208182	38.76	40.23	0.94	-0.09
snx10	6	31897173	31938631	NC_041323.1	12	37240858	37318066	NC_006089.5	2	32217074	32251178	31.37	31.49	0.97	-0.04
skap2	NW_003338822.1	1658021	1789235	NC_041323.1	12	37512590	37615805	NC_006089.5	2	32393652	32502381	33.31	34.76	0.94	-0.1
hoxa1	NW_003338822.1	1540527	1545004	NC_041323.1	12	37709483	37712600	NC_006089.5	2	32576149	32578528	34.03	31.96	1.04	0.06
hoxa2	NW_003338822.1	1530313	1532899	NC_041323.1	12	37717521	37729569	NC_006089.5	2	32582774	32584625	32.45	31.7	1	0
hoxa3	NW_003338822.1	1461696	1525097	NC_041323.1	12	37724826	37756336	NC_006089.5	2	32588738	32632582	22.74	25.6	0.87	-0.2
hoxa4	NW_003338822.1	1489718	1493120	NC_041323.1	12	37750356	37752812	NC_006089.5	2	32608898	32611204	28.38	28.17	0.98	-0.02
hoxa5	NW_003338822.1	1470981	1475249	NC_041323.1	12	37764395	37767691	NC_006089.5	2	32622230	32624987	35.54	25.29	1.37	0.46
hoxa6	NW_003338822.1	1465974	1470893	NC_041323.1	12	37768742	37772828	NC_006089.5	2	32626024	32628685	26.08	31.26	0.81	-0.3
hoxa7	NW_003338822.1	1454386	1459553	NC_041323.1	12	37778479	37782258	NC_006089.5	2	32633891	32637339	32.2	29.71	1.06	0.08
hoxa9	NW_003338822.1	1436624	1442162	NC_041323.1	12	37789508	37793241	NC_006089.5	2	32643254	32645922	19.98	25.23	0.77	-0.37
hoxa10	NW_003338822.1	1422616	1428221	NC_041323.1	12	37799384	37813626	NC_006089.5	2	32650957	32660740	38.87	30.04	1.26	0.34
hoxa11	NW_003338822.1	1402700	1409156	NC_041323.1	12	37813724	37827601	NC_006089.5	2	32662555	32666093	29.45	24.12	1.19	0.25
hoxa13	NW_003338822.1	1375064	1380375	NC_041323.1	12	37834688	37838940	NC_006089.5	2	32680689	32682123	23.71	19.86	1.17	0.22
evx1	NW_003338822.1	1242693	1256726	NC_041323.1	12	37917343	37923935	NC_006089.5	2	32714480	32718308	23.13	28.02	0.81	-0.31
tax1bp1	NW_003338822.1	946086	979191	NC_041323.1	12	38122640	38155062	NC_006089.5	2	32936016	32986430	32.24	34.63	0.91	-0.14
jazf1	NW_003338822.1	876124	943650	NC_041323.1	12	38156298	38283504	NC_006089.5	2	32987169	33160334	36.03	29.78	1.18	0.24
creb5	NW_003338822.1	361568	703300	NC_041323.1	12	38364970	38630257	NC_006089.5	2	33230869	33481810	32.85	31.18	1.03	0.04
tril	NW_003338822.1	287806	291858	NC_041323.1	12	38680720	38685493	NC_006089.5	2	33523588	33532593	33.16	25.07	1.29	0.37
chn2	NW_003338822.1	1582	167610	NC_041323.1	12	38786999	38934774	NC_006089.5	2	33620003	33781930	38	38.65	0.96	-0.06
wipf3	6	35551847	35600380	NC_041323.1	12	38987150	39020707	NC_006089.5	2	33827688	33863791	39.26	34.02	1.13	0.17
scrn1	6	35511028	35550440	NC_041323.1	12	39021656	39051940	NC_006089.5	2	33866045	33902714	36.48	33.34	1.07	0.1
fkbp14	6	35487725	35498703	NC_041323.1	12	39054173	39061999	NC_006089.5	2	33912394	33919749	30.27	30.72	0.96	-0.06
plekha8	6	35448148	35487555	NC_041323.1	12	39062503	39085996	NC_006089.5	2	33920032	33946239	28.38	29.21	0.95	-0.08
colq	6	35385481	35432791	NC_041323.1	12	39098601	39148282	NC_006089.5	2	33945154	33995748	32.7	30.88	1.03	0.05
hacl1	6	35343636	35374042	NC_041323.1	12	39152541	39180800	NC_006089.5	2	33996442	34016723	33.09	30.86	1.05	0.07
btd	6	35329030	35343674	NC_041323.1	12	39180729	39198473	NC_006089.5	2	34016958	34027627	30.05	28.64	1.02	0.04
ankrd28	6	35217588	35327666	NC_041323.1	12	39200376	39297832	NC_006089.5	2	34032784	34140208	33.67	30.77	1.07	0.1
galnt15	6	35105857	35130822	NC_041323.1	12	39366004	39386722	NC_006089.5	2	34254887	34286133	34.15	33.59	0.99	-0.01
dph3	6	35086736	35092573	NC_041323.1	12	39387110	39391529	NC_006089.5	2	34293910	34296722	25.35	28.71	0.86	-0.21
oxnad1	6	35060955	35086551	NC_041323.1	12	39391680	39423159	NC_006089.5	2	34296770	34315711	37.46	34.96	1.05	0.07
rftn1	6	34909945	35055505	NC_041323.1	12	39434247	39541916	NC_006089.5	2	34320041	34414155	30.07	30.52	0.96	-0.06
dazl	6	34873474	34893126	NC_041323.1	12	39554497	39571536	NC_006089.5	2	34429592	34442834	32.57	32.45	0.98	-0.03
plcl2	6	34682168	34821337	NC_041323.1	12	39640510	39719821	NC_006089.5	2	34518559	34615665	34.18	34.1	0.98	-0.03
tbc1d5	6	34279277	34589040	NC_041323.1	12	39696681	39985351	NC_006089.5	2	34647772	34954842	33.99	34.18	0.97	-0.04
satb1	6	33634156	33752636	NC_041323.1	12	40217551	40339269	NC_006089.5	2	35149984	35241241	33.74	31.6	1.04	0.06
kcnh8	6	33107594	33329167	NC_041323.1	12	40620744	40778030	NC_006089.5	2	35491626	35658800	32.01	34.9	0.9	-0.16
efhb	6	32980099	33004754	NC_041323.1	12	40864119	40883932	NC_006089.5	2	35741016	35760148	35.98	30.04	1.17	0.23
rab5a	6	32945889	32967649	NC_041323.1	12	40895945	40916769	NC_006089.5	2	35764554	35781507	42.73	42.03	0.99	-0.01
kat2b	6	32867348	32925033	NC_041323.1	12	40984173	41029923	NC_006089.5	2	35794317	35835802	31.4	32.06	0.96	-0.06
znf385d	6	32193850	32363717	NC_041323.1	12	41457863	41837273	NC_006089.5	2	36198544	36598911	35	30.58	1.12	0.16
ube2e1	NW_003338904.1	686020	770610	NC_041323.1	12	42216986	42274923	NC_006089.5	2	37075620	37120947	35.55	39.95	0.87	-0.2
nkiras1	NW_003338904.1	667274	685353	NC_041323.1	12	42280663	42304067	NC_006089.5	2	37120567	37133551	37.29	28.43	1.28	0.36
rpl15	NW_003338904.1	662902	667306	NC_041323.1	12	42292054	42296590	NC_006089.5	2	37133701	37138795	36.86	34.55	1.04	0.06
rarb	NW_003338927.1	790566	903315	NC_041323.1	12	42607416	42953391	NC_006089.5	2	37462374	37784739	33.35	34.43	0.95	-0.08
top2b	NW_003338927.1	735432	789518	NC_041323.1	12	42953446	42996019	NC_006089.5	2	37785716	37847266	33.92	34.1	0.97	-0.04
ngly1	NW_003338927.1	698184	726184	NC_041323.1	12	43004286	43030273	NC_006089.5	2	37862138	37881484	29.57	33.26	0.87	-0.2
oxsm	NW_003338927.1	685957	692116	NC_041323.1	12	43029902	43037416	NC_006089.5	2	37881687	37888169	31.2	29.6	1.03	0.04
lrrc3b	NW_003338927.1	272006	280574	NC_041323.1	12	43271474	43347306	NC_006089.5	2	38121831	38166188	25.97	40.68	0.62	-0.68
nek10	1	196439356	196515564	NC_041323.1	12	43504539	43613519	NC_006089.5	2	38166793	38378673	33.73	32.38	1.02	0.03
slc4a7	1	196335675	196428613	NC_041323.1	12	43640952	43705975	NC_006089.5	2	38383835	38517092	35.39	34.37	1.01	0.01
eomes	1	196231885	196244893	NC_041323.1	12	43772013	43777990	NC_006089.5	2	38541856	38546627	30.74	32.07	0.94	-0.09
cmc1	1	196003304	196038257	NC_041323.1	12	43948678	43991804	NC_006089.5	2	38726385	38770292	30.27	41.24	0.72	-0.48
azi2	1	195977403	196003065	NC_041323.1	12	43993141	44015095	NC_006089.5	2	38774532	38796875	31.41	36.91	0.83	-0.27
rbms3	1	194952910	195885435	NC_041323.1	12	44200647	44850142	NC_006089.5	2	38853298	39552113	29.62	34.72	0.83	-0.26
tgfbr2	1	194654476	194689172	NC_041323.1	12	45079497	45147846	NC_006089.5	2	39747911	39812095	30.4	34.69	0.86	-0.22
gadl1				NC_041323.1	12	45157388	45259136	NC_006089.5	2	39823210	39986267	34.91	33.72	1.01	0.02
stt3b	1	193857349	193908980	NC_041323.1	12	45559241	45604884	NC_006089.5	2	40078293	40128991	34.05	30.65	1.09	0.12
osbpl10	1	193738784	193850546	NC_041323.1	12	45608422	45689962	NC_006089.5	2	40132663	40237942	31.66	29.12	1.06	0.09
gpd1l	1	193668667	193700706	NC_041323.1	12	45725304	45751361	NC_006089.5	2	40237145	40289070	33.5	38.41	0.85	-0.23
cmtm8	1	193613217	193646079	NC_041323.1	12	45777212	45807347	NC_006089.5	2	40287706	40340907	31.92	32.82	0.95	-0.07
cmtm7	1	193552334	193561065	NC_041323.1	12	45815486	45829509	NC_006089.5	2	40344971	40372789	35.39	30.95	1.12	0.16
cmtm6				NC_041323.1	12	45836677	45853773	NC_006089.5	2	40380169	40393384	36.25	27.67	1.28	0.36
dync1li1	1	193476161	193508675	NC_041323.1	12	45860095	45885263	NC_006089.5	2	40398724	40421252	33.52	31.01	1.06	0.08
cnot10	1	193413635	193447642	NC_041323.1	12	45903287	45925174	NC_006089.5	2	40442858	40472054	33.66	31.93	1.03	0.04
trim71	1	193360319	193410904	NC_041323.1	12	45925815	45981499	NC_006089.5	2	40474702	40529607	25.79	29.21	0.86	-0.21
tcaim	1	193281442	193307678	NC_041323.1	12	46033439	46051827	NC_006089.5	2	40558061	40581115	34.24	33.71	0.99	-0.01
abhd5	1	192888862	192919414	NC_041323.1	12	46316455	46344111	NC_006089.5	2	40792849	40822455	34.95	32.2	1.06	0.08
ano10	1	192791092	192871412	NC_041323.1	12	46351571	46437310	NC_006089.5	2	40838358	40956499	34.93	30.63	1.11	0.16
snrk	1	192739062	192777019	NC_041323.1	12	46443601	46477897	NC_006089.5	2	40960345	40999704	33.5	31.97	1.02	0.03
pomgnt2	6	35810320	35849498	NC_041323.1	12	46582867	46597716	NC_006089.5	2	41054999	41087066	35.15	31.53	1.09	0.12
fam198a	6	35938277	35999147					NC_006089.5	2	41077546	41114829	35.87	28.64	1.22	0.29
rpl14	6	36031115	36037199	NC_041323.1	12	46630754	46637254	NC_006089.5	2	41121564	41124715	47.36	50.53	0.92	-0.13
entpd3	6	36043295	36089820	NC_041323.1	12	46640964	46670942	NC_006089.5	2	41121569	41147543	32.15	33.92	0.93	-0.11
ggct	6	36147498	36159095	NC_041323.1	12	46705145	46718131	NC_006089.5	2	41172038	41178884	32.93	32.01	1	0.01
nod1	6	36171458	36233643	NC_041323.1	12	46719690	46762232	NC_006089.5	2	41172456	41209368	31.53	33.04	0.93	-0.1
eaf1	6	36423097	36441976	NC_041323.1	12	46926086	46942359	NC_006089.5	2	41328393	41350775	32.52	31.52	1.01	0.01
mettl6	6	36441899	36453364	NC_041323.1	12	46942403	46960428	NC_006089.5	2	41350642	41359558	39.25	33.5	1.14	0.19
sh3bp5	6	36486454	36567977	NC_041323.1	12	46970715	47027029	NC_006089.5	2	41391821	41434407	34.78	25.56	1.33	0.41
capn7	6	36574198	36603650	NC_041323.1	12	46985284	47073170	NC_006089.5	2	41435464	41464675	33.14	29.63	1.09	0.13
pik3r4	6	37053476	37090165	NC_041323.1	12	47390244	47419902	NC_006089.5	2	41543358	41566491	33.67	32.58	1.01	0.01
atp2c1	6	37152468	37220109	NC_041323.1	12	47439429	47503339	NC_006089.5	2	41567138	41667077	34.79	31.66	1.07	0.1
aste1	6	37220026	37239161	NC_041323.1	12	47504052	47513411	NC_006089.5	2	41671424	41676373	30.88	32.7	0.92	-0.12
nek11	6	37239261	37382280	NC_041323.1	12	47513419	47593841	NC_006089.5	2	41676246	41775159	31.74	30.11	1.03	0.04
mrpl3	6	37468046	37501919	NC_041323.1	12	47642954	47664404	NC_006089.5	2	41825713	41854007	31	31.51	0.96	-0.06
cpne4	6	37520656	37801232	NC_041323.1	12	47670404	47936763	NC_006089.5	2	41858801	42075879	33.76	34.33	0.96	-0.06
dnajc13	6	38045043	38148768	NC_041323.1	12	48064726	48126686	NC_006089.5	2	42192068	42245867	32.74	33.16	0.96	-0.05
acad11	6	38150182	38193001	NC_041323.1	12	48126550	48167878	NC_006089.5	2	42247127	42275271	35.49	30.67	1.13	0.18
ackr4	6	38162199	38167732	NC_041323.1	12	48137122	48142230	NC_006089.5	2	42256779	42262626	24.62	28.75	0.84	-0.26
uba5	6	38196859	38211841	NC_041323.1	12	48168151	48179521	NC_006089.5	2	42275721	42285595	33.63	32.05	1.03	0.04
nphp3	6	38213960	38266625	NC_041323.1	12	48181613	48219352	NC_006089.5	2	42286596	42312837	32.24	30.09	1.05	0.07
tmem108	NW_003338771.1	2359956	2388264	NC_041323.1	12	48320182	48512746	NC_006089.5	2	42394259	42553659	36.9	50.29	0.72	-0.48
bfsp2	NW_003338771.1	2334005	2359141	NC_041323.1	12	48513875	48532839	NC_006089.5	2	42556658	42572136	32.77	33.16	0.97	-0.05
cdv3	NW_003338771.1	2313417	2330959	NC_041323.1	12	48538230	48552472	NC_006089.5	2	42576015	42583430	36.12	31.87	1.11	0.15
topbp1	NW_003338771.1	2267100	2312009	NC_041323.1	12	48553887	48584759	NC_006089.5	2	42590898	42614146	35.03	31.45	1.09	0.12
xcr1	NW_003338871.1	391913	393720	NC_041323.1	12	48653723	48656099	NC_006089.5	2	42681352	42682359	26.28	20.52	1.25	0.32
fyco1	NW_003338871.1	288630	380991	NC_041323.1	12	48662858	48714878	NC_006089.5	2	42690807	42726328	34.07	31.78	1.05	0.07
lztfl1	NW_003338871.1	256025	266595	NC_041323.1	12	48718892	48728546	NC_006089.5	2	42727996	42751510	32.8	34.17	0.94	-0.09
slc6a20	NW_003338871.1	219468	247432	NC_041323.1	12	48735559	48758871	NC_006089.5	2	42754762	42768108	32.46	35.99	0.88	-0.18
snrpd1	NW_003338871.1	215260	219523	NC_041323.1	12	48758136	48765034	NC_006089.5	2	42767073	42772128	32.57	29.76	1.07	0.1
sacm1l	NW_003338871.1	158095	211923	NC_041323.1	12	48769056	48803506	NC_006089.5	2	42772379	42796918	38.41	35.43	1.06	0.08
limd1	NW_003338871.1	103842	152321	NC_041323.1	12	48806171	48845222	NC_006089.5	2	42801527	42824459	32.89	31.49	1.02	0.03
lars2	NW_003338871.1	3095	82955	NC_041323.1	12	48937156	49025703	NC_006089.5	2	42832656	42919794	34.78	33.19	1.02	0.03
cdcp1	NW_003339158.1	212423	284449	NC_041323.1	12	49230365	49271961	NC_006089.5	2	43004229	43031028	29.99	34.55	0.85	-0.24
clec3b	NW_003339158.1	322191	334781	NC_041323.1	12	49291626	49303005	NC_006089.5	2	43035071	43041722	30.14	33.31	0.88	-0.18
exosc7	NW_003339158.1	355129	372728	NC_041323.1	12	49308338	49331787	NC_006089.5	2	43050870	43070357	29.47	31.6	0.91	-0.13
zdhhc3	NW_003338771.1	45176	64724	NC_041323.1	12	49333975	49380222	NC_006089.5	2	43070481	43101952	32.96	32.23	1	0
tgm4								NC_006089.5	2	43102689	43113202	31.98	32.38	0.96	-0.05
kif15	NW_003338771.1	249641	295850	NC_041323.1	12	49503117	49545944	NC_006089.5	2	43128048	43164145	34.33	36.33	0.92	-0.12
kiaa1143	NW_003338771.1	295961	321301	NC_041323.1	12	49546013	49562181	NC_006089.5	2	43164342	43170238	34.16	34.5	0.97	-0.05
ctnnb1	NW_003338771.1	861628	898758	NC_041323.1	12	49932251	49960594	NC_006089.5	2	43386047	43407736	34.04	29.42	1.13	0.18
ulk4	NW_003338771.1	898515	1152411	NC_041323.1	12	49960351	50122804	NC_006089.5	2	43407311	43629001	33.81	32.43	1.02	0.03
trak1	NW_003338771.1	1178147	1366271	NC_041323.1	12	50129795	50273061	NC_006089.5	2	43638250	43769677	32.36	33.26	0.95	-0.07
cck	NW_003338771.1	1385180	1392806	NC_041323.1	12	50284577	50295685	NC_006089.5	2	43774048	43778726	36.26	30.34	1.17	0.22
eif1b	NW_003338771.1	1599775	1614421	NC_041323.1	12	50393730	50400317	NC_006089.5	2	43913689	43925368	29.65	30.92	0.94	-0.09
myrip	NW_003338771.1	1657351	1862068	NC_041323.1	12	50420538	50574094	NC_006089.5	2	43938632	44144190	34.89	34.25	1	-0.01
tmc2	NW_003338771.1	2086759	2172485					NC_006089.5	2	44255625	44282080	31.47	32.71	0.94	-0.09
rpsa	NW_003338771.1	2172542	2181957					NC_006089.5	2	44295260	44300007	54.43	60.85	0.87	-0.19
slc25a38	NW_003338871.1	455249	503299					NC_006089.5	2	44306845	44315053	40.18	31.46	1.25	0.32
glb1	NW_003338871.1	588297	652157	NC_041323.1	12	53488540	53528297	NC_006089.5	2	44367312	44413022	29.14	27.55	1.03	0.05
crtap	NW_003338871.1	693238	714242	NC_041323.1	12	53470861	53485765	NC_006089.5	2	44415479	44436890	28.73	27.95	1	0.01
susd5	NW_003338871.1	721735	764528	NC_041323.1	12	53435896	53459555	NC_006089.5	2	44445957	44490199	33.26	33.92	0.96	-0.06
fbxl2	NW_003338871.1	786711	823973	NC_041323.1	12	53375560	53422456	NC_006089.5	2	44518151	44570429	32.44	31.86	0.99	-0.01
ubp1	NW_003338871.1	823075	880095	NC_041323.1	12	53361670	53392733	NC_006089.5	2	44569864	44605832	38.75	35.43	1.07	0.1
clasp2	NW_003338871.1	887149	1110634	NC_041323.1	12	53229092	53352404	NC_006089.5	2	44612219	44749602	31.92	33.88	0.92	-0.12
pdcd6ip	NW_003338871.1	1160824	1205054	NC_041323.1	12	53190294	53215996	NC_006089.5	2	44772822	44805675	31.57	33.1	0.93	-0.1
arpp21	6	42359215	42783096	NC_041323.1	12	52399979	52652133	NC_006089.5	2	45304349	45490611	33.65	32.51	1.01	0.02
stac				NC_041323.1	12	52157832	52231449	NC_006089.5	2	45700604	45774469	32.14	31.09	1.01	0.01
dclk3	6	43422240	43430464	NC_041323.1	12	52057851	52087485	NC_006089.5	2	45847446	45873749	34.11	27.17	1.23	0.29
trank1	6	43523943	43621772	NC_041323.1	12	51946690	52000818	NC_006089.5	2	45896643	45948910	32.58	31.91	1	0
mlh1	6	43632300	43673052	NC_041323.1	12	51893821	51925985	NC_006089.5	2	45962358	45980035	35.63	30.36	1.15	0.2
stard3nl	6	47875833	47905757	NC_041323.1	12	55672124	55697626	NC_006089.5	2	45981239	46001446	48.92	54.07	0.88	-0.18
epdr1	6	47811765	47831025	NC_041323.1	12	55613284	55623743	NC_006089.5	2	46065859	46094907	27.07	29.53	0.9	-0.16
sfrp4	6	47778621	47788942	NC_041323.1	12	55592987	55604712	NC_006089.5	2	46095018	46105431	30.9	31.9	0.95	-0.08
nme8	6	47729332	47772300	NC_041323.1	12	55564438	55589429	NC_006089.5	2	46118590	46138687	30.46	28.49	1.04	0.06
gpr141	6	47688435	47708762					NC_006089.5	2	46193308	46214571	28.21	34.91	0.79	-0.34
aoah	6	47001657	47111793	NC_041323.1	12	54996042	55077011	NC_006089.5	2	46603726	46673147	29.79	31.3	0.93	-0.11
anln	6	46963260	47001922	NC_041323.1	12	54962761	54994604	NC_006089.5	2	46673591	46702559	34.16	34.54	0.97	-0.05
kiaa0895	6	46918452	46938782	NC_041323.1	12	54933845	54957357	NC_006089.5	2	46711155	46736207	30.85	30.21	1	0
eepd1	6	46839233	46907885	NC_041323.1	12	54855542	54928088	NC_006089.5	2	46739306	46799057	28.96	31.75	0.89	-0.17
tbx20	6	46247027	46307668	NC_041323.1	12	54404563	54446153	NC_006089.5	2	47177036	47209226	32.45	25.47	1.24	0.32
dpy19l1	6	46177426	46228574	NC_041323.1	12	54336002	54373129	NC_006089.5	2	47234027	47281980	36.29	36.63	0.97	-0.05
npsr1	6	46061245	46154826	NC_041323.1	12	54241275	54317024	NC_006089.5	2	47314604	47379159	33.75	33.67	0.98	-0.03
fancd2os	6	45947392	45948029	NC_041323.1	12	54172575	54173105	NC_006089.5	2	47445834	47447372	40.37	27.85	1.42	0.5
bmper	6	45727038	45940322	NC_041323.1	12	53974891	54169076	NC_006089.5	2	47460646	47614127	32.87	32.69	0.98	-0.03
bbs9	6	45414824	45675045	NC_041323.1	12	53749261	53849295	NC_006089.5	2	47622783	47912758	32.53	34.52	0.92	-0.12
nt5c3a	6	45374066	45414634	NC_041323.1	12	53705285	53731800	NC_006089.5	2	47912825	47936392	35.85	32.79	1.07	0.09
fkbp9	6	45340006	45373229	NC_041323.1	12	53688916	53703460	NC_006089.5	2	47941763	47957624	33.67	30.48	1.08	0.11
kbtbd2	6	45274007	45288071	NC_041323.1	12	50815894	50836486	NC_006089.5	2	47997104	48012447	36.28	33.5	1.06	0.08
avl9	6	45232591	45272262	NC_041323.1	12	50838164	50875223	NC_006089.5	2	48014673	48053455	32.68	28.45	1.12	0.17
lsm5				NC_041323.1	12	50878647	50883342	NC_006089.5	2	48055803	48060206	29.58	37.14	0.78	-0.36
pde1c	6	44760912	45113253	NC_041323.1	12	50973480	51224361	NC_006089.5	2	48070232	48422409	36.65	36.59	0.98	-0.03
ppp1r17	6	44723821	44749821	NC_041323.1	12	51249069	51269496	NC_006089.5	2	48425187	48443414	23.48	35.2	0.65	-0.62
ccdc129	6	44623393	44709409					NC_006089.5	2	48466602	48515821	32.31	28.5	1.11	0.15
neurod6	6	44529533	44534732	NC_041323.1	12	51426669	51430263	NC_006089.5	2	48553366	48578625	28.44	35.27	0.79	-0.34
itga9	6	44033677	44407610	NC_041323.1	12	51512982	51740773	NC_006089.5	2	48649043	48868823	34.03	32.57	1.02	0.03
golga4	6	43851717	43989671	NC_041323.1	12	51759612	51810469	NC_006089.5	2	48886444	48949256	33.25	32.73	0.99	-0.01
lrrfip2	6	43765783	43836663	NC_041323.1	12	51844877	51894165	NC_006089.5	2	48965448	49016436	33.85	33.09	1	0
amph	6	47907801	48019765	NC_041323.1	12	55698225	55791461	NC_006089.5	2	49138824	49243847	36.45	33.43	1.07	0.09
vps41	6	48031964	48180817	NC_041323.1	12	55804576	55919851	NC_006089.5	2	49268406	49377534	35.38	33.86	1.02	0.03
pou6f2	6	48233234	48704961	NC_041323.1	12	56083034	56323962	NC_006089.5	2	49464838	49722356	31.41	29.99	1.02	0.03
yae1d1	6	48791693	48798698					NC_006089.5	2	49804295	49812878	23.43	45.65	0.5	-1
rala	6	48798700	48850952	NC_041323.1	12	56406200	56426791	NC_006089.5	2	49804311	49868305	34.65	26.75	1.27	0.34
cdk13	6	48864610	48908246	NC_041323.1	12	56438168	56473855	NC_006089.5	2	49886352	49945654	32.6	30.88	1.03	0.04
mplkip	6	48917013	48922154	NC_041323.1	12	56477202	56483420	NC_006089.5	2	49945149	49973603	28.76	23.84	1.18	0.24
sugct	6	48922369	49295388	NC_041323.1	12	56481147	56780455	NC_006089.5	2	49974128	50303422	33.89	32.23	1.03	0.04
inhba	6	49715150	49731438	NC_041323.1	12	57092019	57105638	NC_006089.5	2	50568700	50587618	30.88	27.08	1.11	0.16
gli3	6	49908274	50202860	NC_041323.1	12	57218166	57451684	NC_006089.5	2	50696713	50908081	38.4	34.14	1.1	0.14
psma2	6	50520770	50532882	NC_041323.1	12	57640133	57651896	NC_006089.5	2	51149470	51155323	33.3	26.43	1.23	0.3
mrpl32	6	50532981	50542219					NC_006089.5	2	51155614	51158036	63.43	61.19	1.01	0.02
hecw1	6	50595898	50806190	NC_041323.1	12	57742843	57935143	NC_006089.5	2	51254034	51490083	33.67	33.66	0.98	-0.03
stk17a	6	50814429	50848613	NC_041323.1	12	57943762	57986425	NC_006089.5	2	51496731	51521460	32.46	31.6	1	0
blvra	6	50938572	50967355	NC_041323.1	12	58054837	58152214	NC_006089.5	2	51575369	51620993	31.48	27.3	1.13	0.17
vopp1	6	50966346	51040604					NC_006089.5	2	51667730	51738595	34.4	27.25	1.23	0.3
lancl2	6	51050717	51078191	NC_041323.1	12	58163486	58191582	NC_006089.5	2	51744320	51778921	30.01	29.65	0.99	-0.02
egfr	6	51107082	51250795	NC_041323.1	12	58211351	58357669	NC_006089.5	2	51809290	51959527	32.75	30.21	1.06	0.08
sec61g	6	51419085	51427433	NC_041323.1	12	58421603	58426021	NC_006089.5	2	52114886	52118653	34.95	32.18	1.06	0.09
tpk1	6	51428023	51787329	NC_041323.1	12	58426578	58656192	NC_006089.5	2	52663226	53001514	30.97	30.06	1.01	0.01
cntnap2	6	52402918	53276153	NC_041323.1	12	59095761	60043345	NC_006089.5	2	53294665	54190322	30.38	33.58	0.88	-0.18
cul1	6	53291667	53334912	NC_041323.1	12	60063874	60109591	NC_006089.5	2	54229939	54279176	35.68	32.32	1.08	0.11
ezh2	6	53336460	53428966	NC_041323.1	12	60112089	60181165	NC_006089.5	2	54282222	54331872	30.85	33.24	0.91	-0.14
pdia4	6	53454678	53471776	NC_041317.1	6	85012	101925	NC_006089.5	2	54400029	54411549	32.21	29.22	1.08	0.11
ramp3	NW_003339748.1	44899	53890					NC_006089.5	2	54476067	54528041	24.48	30.45	0.79	-0.35
adcy1	6	53652934	53812778	NC_041323.1	12	60503347	60703991	NC_006089.5	2	54708498	54913784	31.94	28.52	1.09	0.13
igfbp1	6	53856881	53866939	NC_041323.1	12	60426892	60437335	NC_006089.5	2	54916531	54922765	32.09	30.19	1.04	0.05
igfbp3	6	53879662	53907006					NC_006089.5	2	54932446	54948020	27.4	26.09	1.03	0.04
tns3	6	53927543	53958494	NC_041324.1	13	6803318	6907535	NC_006089.5	2	55047671	55271485	32.48	27.87	1.14	0.19
ice1	NW_003338758.1	2742808	2781500	NC_041318.1	7	84484336	84521258	NC_006089.5	2	55320606	55354858	28.26	33.21	0.83	-0.27
nfx1	4	66781890	66839934	NC_041318.1	7	81203595	81240708	NC_006089.5	2	55355095	55431841	33.86	33.32	0.99	-0.01
trip13	6	56049695	56078946	NC_041324.1	13	5009584	5026791	NC_006089.5	2	55539271	55554517	33.36	36.55	0.89	-0.17
brd9	6	56078925	56105043	NC_041324.1	13	5026909	5047804	NC_006089.5	2	55554574	55585518	33.74	31.9	1.03	0.05
tppp	6	56143030	56210735	NC_041324.1	13	5100102	5134772	NC_006089.5	2	55608482	55665921	32.47	29.39	1.08	0.11
slc9a3	6	56341848	56401213	NC_041324.1	13	5237200	5292541	NC_006089.5	2	55719545	55786042	33.34	32.2	1.01	0.02
lrrc14b				NC_041324.1	13	5423808	5428888	NC_006089.5	2	55799363	55803184	27.82	31.06	0.87	-0.19
tgfbr1	6	55820788	55853499	NC_041324.1	13	4829332	4854274	NC_006089.5	2	55933804	55966769	36.08	33.03	1.07	0.09
reck	6	55742552	55809454	NC_041324.1	13	4742755	4823997	NC_006089.5	2	55968470	56050866	28.57	32.87	0.85	-0.24
adnp2	4	53227155	53248334	NC_041318.1	7	59367200	59382782	NC_006089.5	2	56052774	56071351	37.11	41.96	0.86	-0.21
rbfa	4	53194007	53203990	NC_041318.1	7	59342292	59348354	NC_006089.5	2	56089456	56105012	31.58	34.27	0.9	-0.15
txnl4a	4	53138500	53146667	NC_041318.1	7	59307804	59314416	NC_006089.5	2	56166292	56177703	37.07	32.78	1.1	0.14
pqlc1	4	53042901	53113506	NC_041318.1	7	59235240	59300915	NC_006089.5	2	56191033	56265429	31.4	31.97	0.96	-0.06
kcng2	4	52917335	53033304	NC_041318.1	7	59184472	59232496	NC_006089.5	2	56269863	56342379	30.85	25.59	1.18	0.24
ctdp1	4	52783129	52830400	NC_041318.1	7	59085815	59137099	NC_006089.5	2	56379048	56480181	33.99	32.11	1.03	0.05
nfatc1	4	52504017	52674663	NC_041318.1	7	58882613	59010912	NC_006089.5	2	56571870	56689629	33.66	32.67	1.01	0.01
atp9b	4	52299524	52458671	NC_041318.1	7	58735660	58853993	NC_006089.5	2	56707197	56875310	31.44	31.24	0.98	-0.02
sall3	4	52243563	52267979	NC_041318.1	7	58690996	58716115	NC_006089.5	2	56913263	56940043	32.59	30.7	1.04	0.05
kiaa0319	4	53983975	54025724	NC_041318.1	7	59913719	59946779	NC_006089.5	2	57759873	57816775	32.45	34.41	0.92	-0.12
aldh5a1	4	54025803	54045946	NC_041318.1	7	59946214	59962146	NC_006089.5	2	57814628	57824916	30.24	31.96	0.92	-0.11
gpld1	4	54046085	54088799	NC_041318.1	7	59961302	59987611	NC_006089.5	2	57826835	57852534	33.57	33.56	0.98	-0.03
mrs2	4	54090562	54109896	NC_041318.1	7	59991160	60018834	NC_006089.5	2	57853491	57864596	31.22	34.91	0.87	-0.19
dcdc2	4	54158277	54217309	NC_041318.1	7	60016768	60061081	NC_006089.5	2	57869507	57929954	34.87	31.12	1.09	0.13
nrsn1	4	54229468	54252051	NC_041318.1	7	60074214	60088967	NC_006089.5	2	57938757	57945892	30.53	32.13	0.93	-0.11
prl	4	54983217	54990003	NC_041318.1	7	60634497	60643690	NC_006089.5	2	58571228	58577382	29.2	34.56	0.83	-0.28
sox4	4	55340502	55345296	NC_041318.1	7	60936110	60938487	NC_006089.5	2	58890315	58891803	27.09	31.99	0.83	-0.27
cdkal1	4	55475855	55794805	NC_041318.1	7	61020141	61250645	NC_006089.5	2	59039260	59415499	31.56	23.78	1.3	0.37
e2f3	4	55797829	55833170	NC_041318.1	7	61252627	61277407	NC_006089.5	2	59418900	59462634	32.72	31.87	1	0
mboat1	4	55850414	55890911	NC_041318.1	7	61289897	61321836	NC_006089.5	2	59566566	59627238	28.02	28.84	0.95	-0.08
id4	4	56128061	56136383	NC_041318.1	7	61454432	61459785	NC_006089.5	2	59731677	59733510	21.54	22.59	0.93	-0.1
rnf144b	4	56752187	56823056	NC_041318.1	7	61852600	61923137	NC_006089.5	2	60234250	60324129	35.05	33.47	1.02	0.03
dek	4	56862959	56879579	NC_041318.1	7	61923912	61941909	NC_006089.5	2	60324480	60369323	35.07	33.48	1.02	0.03
kdm1b	4	56888788	56917704	NC_041318.1	7	61942598	61966838	NC_006089.5	2	60344878	60373545	34.4	32.98	1.02	0.03
tpmt	4	56925868	56938519	NC_041318.1	7	61966997	61986179	NC_006089.5	2	60373623	60382616	38.68	34.91	1.08	0.11
nhlrc1	4	56947412	56949006	NC_041318.1	7	61986222	61991549	NC_006089.5	2	60384193	60387204	35.32	33.4	1.03	0.05
kif13a				NC_041318.1	7	62001263	62073520	NC_006089.5	2	60397484	60511222	25.44	32.36	0.77	-0.38
sirt5	4	57071905	57080979	NC_041318.1	7	62076702	62087981	NC_006089.5	2	60510182	60519961	36.72	33.72	1.06	0.09
nol7	4	57083836	57090694	NC_041318.1	7	62088706	62096564	NC_006089.5	2	60520070	60523466	28.47	32.39	0.86	-0.22
ranbp9	4	57091148	57130383	NC_041318.1	7	62097492	62124918	NC_006089.5	2	60523847	60561356	31.78	29.36	1.06	0.08
mcur1	4	57164067	57179297	NC_041318.1	7	62138976	62151858	NC_006089.5	2	60595552	60610916	32.06	32.52	0.96	-0.05
rnf182	4	57228643	57267693	NC_041318.1	7	62182660	62201738	NC_006089.5	2	60639783	60668283	35.68	37.45	0.93	-0.1
cd83	4	57296074	57307320					NC_006089.5	2	60692960	60705668	32.79	28.61	1.12	0.16
dtnbp1	4	58164404	58241388	NC_041318.1	7	62754728	62796584	NC_006089.5	2	61272021	61340796	33.61	34.45	0.95	-0.07
mylip	4	58372670	58385416	NC_041318.1	7	62940931	62953626	NC_006089.5	2	61479711	61493936	33.77	27.27	1.21	0.27
atxn1	4	58476600	58785013	NC_041318.1	7	63015029	63238132	NC_006089.5	2	61566796	62027465	32.17	33.95	0.93	-0.11
rbm24	4	58991133	59014458	NC_041318.1	7	63326263	63344740	NC_006089.5	2	61921863	61947358	37.17	37.45	0.97	-0.04
cap2	4	59033485	59087233	NC_041318.1	7	63356559	63400839	NC_006089.5	2	61960397	62037361	35.49	33.64	1.03	0.04
nup153	4	59113606	59160671	NC_041318.1	7	63416700	63449528	NC_006089.5	2	62039157	62086250	30.87	30.12	1	0
pak1ip1	4	59187559	59197267	NC_041318.1	7	63472319	63480396	NC_006089.5	2	62101085	62110796	31.48	30.17	1.02	0.03
gfod1	4	59250602	59310594	NC_041318.1	7	63508438	63552322	NC_006089.5	2	62135877	62206799	26.85	24.02	1.09	0.13
phactr1	4	59354307	59703816	NC_041318.1	7	63576872	63828749	NC_006089.5	2	62237668	62533078	29.69	30.23	0.96	-0.06
hivep1				NC_041318.1	7	64005939	64092257	NC_006089.5	2	62710026	62823538	31.72	32.65	0.95	-0.08
adtrp	NW_003338756.1	3170635	3208109	NC_041318.1	7	64128224	64145666	NC_006089.5	2	62886187	62916961	32.24	50.12	0.63	-0.67
tmem170b	NW_003338756.1	3104728	3120634	NC_041318.1	7	64169131	64181365	NC_006089.5	2	62950803	62972895	30.31	28.51	1.04	0.05
nedd9	NW_003338756.1	2898671	2974830	NC_041318.1	7	64296034	64354173	NC_006089.5	2	63022193	63116579	33.33	33.84	0.96	-0.06
elovl2	NW_003338756.1	2746178	2841056	NC_041318.1	7	64395632	64448700	NC_006089.5	2	63142204	63183618	32.63	30.74	1.04	0.05
gcm2	NW_003338756.1	2655952	2670852	NC_041318.1	7	64488995	64495048	NC_006089.5	2	63211417	63216473	33.25	33.85	0.96	-0.06
mak	NW_003338756.1	2591048	2628803	NC_041318.1	7	64502726	64533073	NC_006089.5	2	63220145	63252528	30.45	29.06	1.02	0.03
gcnt2								NC_006089.5	2	63255945	63271687	32.39	35.22	0.9	-0.15
tfap2a	NW_003338756.1	2372629	2409008	NC_041318.1	7	64652458	64682364	NC_006089.5	2	63283222	63300911	30.69	30.22	0.99	-0.01
slc35b3	NW_003338756.1	1201251	1229136	NC_041318.1	7	65441947	65465126	NC_006089.5	2	64129051	64156540	32.41	34.16	0.93	-0.11
bloc1s5	NW_003338756.1	970249	979612	NC_041318.1	7	65590970	65604237	NC_006089.5	2	64317395	64330910	32.49	25.2	1.26	0.33
txndc5	NW_003338756.1	881466	912063	NC_041318.1	7	65630059	65656952	NC_006089.5	2	64356481	64377248	36.88	30.1	1.2	0.26
bmp6	NW_003338756.1	717242	881913	NC_041318.1	7	65657342	65682505	NC_006089.5	2	64375767	64462773	33.81	39.8	0.83	-0.27
dsp	NW_003338756.1	651659	709519	NC_041318.1	7	65822182	65853776	NC_006089.5	2	64524237	64561360	31.33	30.33	1.01	0.01
riok1	NW_003338858.1	482139	506674	NC_041318.1	7	65873728	65894219	NC_006089.5	2	64598088	64612791	33.45	32.25	1.01	0.02
ssr1	NW_003338858.1	461762	479941	NC_041318.1	7	65917021	65931004	NC_006089.5	2	64612806	64647744	32.71	29.13	1.1	0.13
rreb1	NW_003338858.1	147652	322128	NC_041318.1	7	66035613	66164067	NC_006089.5	2	64645157	64767532	33.44	29.92	1.09	0.13
[truncated: 16,688 more rows]

## Sheet: Table S3
Table S3: List of primers and relative male to female gene dose ratios, estimated from qPCR quantification values.
						Eublepharidae												Phyllodactylidae		Sphaerodactylidae
Gene symbol	Gene full name	Position in GGA	Primer name	Forward primer	Reverse primer	Aeluroscalabotes felinus	Coleonyx elegans	Coleonyx brevis	Coleonyx variegatus	Coleonyx mitratus G	Eublepharis hardwickii	Eublepharis macularius	Hemitheconyx caudicinctus	Holodactylus africanus	Goniurosaurus luii	Goniurosaurus hainanensis	Goniurosaurus splendens	Tarentola mauritanica	Ptyodactylus togoensis	Sphaerodactylus elegans
mecom	MDS1 and EVI1 complex locus	9	mecom_5	AGGAGATTTTGTGAGGGCAAGA	GCTGTTGGAAAGGTAAGACCAG	1	1	1	1	1	1	1	1	1	1	1	1	1	1	1
noct	nocturnin	4	noct_5	CTTGGGGAAGGCAAAGACAA	GACTAAGGAGTGGCTGAAAGGT	1.03	1.21	1.13	1.04	x	1.09	1.11	0.95	0.93	x	x	0.97	1.01	1.03	1.08
dusp16	dual specificity phosphatase 16	1	dusp16_19	CAAGTTATGCCAGTTCTCCCC	TGGTTCCCCCTAAGTGCTG	x	0.36	x	x	0.51	1.4	1.01	1	0.91	0.86	0.91	0.94	x	x	x
mansc4	MANSC domain containing 4	1	mansc4_3	TTGCTTTTGGGCTGGGTGTG	GAGTATCGTTTCAGGATGTGTGCT	0.94	0.27	1.08	0.98	0.53	1.2	1.2	1	0.93	0.98	x	0.97	x	1.29	x
bms1	BMS1, ribosome biogenesis factor	6	bms1_1	AGCGATGTTACTTTCCTACCCGA	GTCATACACTAATCCTCCCACACC	x	0.47	1.09	x	0.41	1.12	1.09	0.99	x	0.89	0.96	x	x	x	x
lrit1	leucine rich repeat, Ig-like and transmembrane domains 1	6	lrit1_5	CTGCCTGTTGTCTCTTACCTTGA	GCTGCCTCCATTCCACTCATTT	0.84	0.46	x	1.12	x	1.29	1.35	x	0.91	0.9	0.91	x	x	1.53	1.22
lrit2	leucine rich repeat, Ig-like and transmembrane domains 2	6	lrit2_1	ACTTGCTCCCCGCCACTAA	GATGAGTTTCTCCCTCTGTTCCA	0.99	0.35	1.08	1.04	0.59	0.85	1.02	1.09	0.94	0.87	0.97	1.18	0.84	x	0.94
ddx28	DEAD-box helicase 28	11	ddx28_2	AGGTGAAAGAGATTGGCGGA	CCAGGTCTACAAACGAGGGA	1.02	0.26	x	x	x	x	0.82	x	x	x	x	x	x	x	x
ttc38	tetratricopeptide repeat domain 38	1	ttc38_1	CAAGGCTGGGTCTTCCTCTG	CATTGCTTCCCCCTATCTCAAC		0.31
vwf	von Willebrand factor	1	vwf_1	AGAGTGGGCTGTGACGCAA	ATTTGGAGGGATGATGTGGTGG		0.45
sncg	synuclein gamma	6	sncg_1	GCCACAGAACCCAGTAACGA	AACGGAAACCAACCAAGCAC		0.71
osgin1	oxidative stress induced growth inhibitor 1	11	osgin1_1	CGGTGAAAAACCTTGGAGCAG	TGATGGTAGTGAGAAACCCGTC		0.43

## Sheet: Table S4
Table S4: Genes involved in gonad development and differentation from the genomic regions of GGA1, GGA6 and GGA11.
		Anolis carolinensis			Podarcis muralis				Gallus gallus
Gene code	Gene name	scaffold/chromosome	start	end	scaffold	chromosome	start	end	scaffold	chromosome	start	end
sbf1	SET binding factor 1	NW_003339402.1	138443	160045	NC_041321.1	10	75162506	75204113	NC_006088.5	1	1215112	1274500
nup107	nucleoporin 107	NW_003338803.1	1379507	1410655	NC_041321.1	10	29944807	29968772	NC_006088.5	1	35362957	35393184
kitlg	KIT ligand	5	33232428	33342038	NC_041321.1	10	37202910	37306122	NC_006088.5	1	43015486	43066975
stra8	stimulated by retinoic acid 8	5	27969410	27998492	NC_041321.1	10	41383453	41400368	NC_006088.5	1	47889127	47902219
ep300	E1A binding protein p300	5	26108885	26192195	NC_041321.1	10	43973792	44053371	NC_006088.5	1	49778616	49836401
pdgfb	platelet derived growth factor subunit B	5	24499105	24555928	NC_041321.1	10	45229618	45289678	NC_006088.5	1	50720076	50737739
dmc1	DNA meiotic recombinase 1	5	24081159	24100776	NC_041321.1	10	45575618	45596836	NC_006088.5	1	50860962	50876561
sox10	SRY-box 10	NW_003339007.1	123353	153282	NC_041321.1	10	45973383	45999677	NC_006088.5	1	51055238	51064412
igf1	insulin like growth factor 1	5	17591811	17674158	NC_041321.1	10	51316868	51381226	NC_006088.5	1	55281097	55329525
sycp3	synaptonemal complex protein 3	5	17374298	17383833	NC_041321.1	10	51557650	51571246	NC_006088.5	1	55559464	55572402
ccnd2	cyclin D2								NC_006088.5	1	73472300	73515288
g6pd	glucose-6-phosphate dehydrogenase	2	89700419	89736384	NC_041328.1	17	41006905	41030195	NC_006088.5	1	84097496	84102135
vgll3	vestigial like family member 3	3	161248744	161285728	NC_041315.1	4	43755189	43781510	NC_006088.5	1	94356143	94382261
nr0b1	nuclear receptor subfamily 0 group B member 1	3	129401057	129408656	NC_041315.1	4	63202180	63206708	NC_006088.5	1	115748143	115750436
dmd	dystrophin	3	127257380	128903888					NC_006088.5	1	116192483	117188566
glra2	glycine receptor alpha 2	3	120920803	121095050	NC_041315.1	4	68209789	68329750	NC_006088.5	1	123760274	123887833
tlr7	toll like receptor 7	3	120031332	120038783					NC_006088.5	1	124484206	124508751
rp2	retinitis pigmentosa 2 (X-linked recessive)	3	112022592	112038298	NC_041315.1	4	74112167	74126373	NC_006088.5	1	131504405	131522593
fhl2	four and a half LIM domains 2	3	108873147	108905974	NC_041315.1	4	78676189	78707953	NC_006088.5	1	136439348	136481079
fgf9	fibroblast growth factor 9	3	188008556	188053887	NC_041315.1	4	25061906	25103947	NC_006088.5	1	179687260	179717135
emx2	empty spiracles homeobox 2	NW_003338753.1	1110867	1136799	NC_041316.1	5	47569302	47580647	NC_006093.5	6	30230867	30237085
fgfr2	fibroblast growth factor receptor 2	3	64546678	64805724	NC_041316.1	5	45329200	45471803	NC_006093.5	6	31833205	31911251
znf423	zinc finger protein 423	NW_003338774.1	1990377	2486749	NC_041319.1	8	58022485	58326989	NC_006098.5	11	6658075	6892797
ccne1	cyclin E1	NW_003338846.1	1575716	1587954	NC_041319.1	8	60768398	60785796	NC_006098.5	11	8447460	8459801
